# Supplementary material for: Quantitative proteomic analytic approaches to identify metabolic changes in the medial prefrontal cortex of rats exposed to space radiation
Source: Front Physiol. 2022 Aug 26;13:971282. doi: 10.3389/fphys.2022.971282 (PMC9459391; doi:10.3389/fphys.2022.971282)
Supplement: Supplementary file 1 [file Table2.XLSX]

## Sheet: rat-descriptors
Supplementary Table 2: Protein names
UNIPROT_ACCESSION	Name	Species
Q6P6T0	sideroflexin 3(Sfxn3)	Rattus norvegicus
P62744	adaptor-related protein complex 2, sigma 1 subunit(Ap2s1)	Rattus norvegicus
D3ZRN3	actin, beta-like 2(Actbl2)	Rattus norvegicus
Q63270	aconitase 1(Aco1)	Rattus norvegicus
Q9Z272	GIT ArfGAP 1(Git1)	Rattus norvegicus
B5DFK6	adaptor-related protein complex 3, delta 1 subunit(Ap3d1)	Rattus norvegicus
P70600	protein tyrosine kinase 2 beta(Ptk2b)	Rattus norvegicus
Q9Z0J8	neuronal growth regulator 1(Negr1)	Rattus norvegicus
Q3MID5	phosphatidylinositol-4-phosphate 5-kinase type 1 gamma(Pip5k1c)	Rattus norvegicus
Q6P6V0	glucose-6-phosphate isomerase(Gpi)	Rattus norvegicus
D3ZDH8	septin 5(Sept5)	Rattus norvegicus
A8WCF8	tumor protein p63 regulated 1-like(Tprg1l)	Rattus norvegicus
P56558	O-linked N-acetylglucosamine (GlcNAc) transferase(Ogt)	Rattus norvegicus
P63036	DnaJ heat shock protein family (Hsp40) member A1(Dnaja1)	Rattus norvegicus
Q9EQX9	ubiquitin-conjugating enzyme E2N(Ube2n)	Rattus norvegicus
Q9EQS0	transaldolase 1(Taldo1)	Rattus norvegicus
Q5GFD9	impact RWD domain protein(Impact)	Rattus norvegicus
Q6AYN4	phytanoyl-CoA 2-hydroxylase interacting protein-like(Phyhipl)	Rattus norvegicus
P70615	lamin B1(Lmnb1)	Rattus norvegicus
P59215	G protein subunit alpha o1(Gnao1)	Rattus norvegicus
P34058	heat shock protein 90 alpha family class B member 1(Hsp90ab1)	Rattus norvegicus
O08629	tripartite motif-containing 28(Trim28)	Rattus norvegicus
P12785	fatty acid synthase(Fasn)	Rattus norvegicus
Q9QZA2	programmed cell death 6 interacting protein(Pdcd6ip)	Rattus norvegicus
P97685	neurofascin(Nfasc)	Rattus norvegicus
D3ZW56	neurofascin(Nfasc)	Rattus norvegicus
Q68FU3	electron transfer flavoprotein beta subunit(Etfb)	Rattus norvegicus
P14882	propionyl-CoA carboxylase alpha subunit(Pcca)	Rattus norvegicus
O88871	gamma-aminobutyric acid type B receptor subunit 2(Gabbr2)	Rattus norvegicus
D3ZC84	ubiquitin specific peptidase 9, X-linked(Usp9x)	Rattus norvegicus
P52481	CAP, adenylate cyclase-associated protein, 2 (yeast)(Cap2)	Rattus norvegicus
F1LV13	heterogeneous nuclear ribonucleoprotein M(Hnrnpm)	Rattus norvegicus
B2LYI9	tenascin C(Tnc)	Rattus norvegicus
Q568Z9	phytanoyl-CoA 2-hydroxylase interacting protein(Phyhip)	Rattus norvegicus
D4A6H8	catenin alpha 2(Ctnna2)	Rattus norvegicus
D3ZY46	engulfment and cell motility 1(Elmo1)	Rattus norvegicus
P46462	valosin-containing protein(Vcp)	Rattus norvegicus
Q64548	reticulon 1(Rtn1)	Rattus norvegicus
P55053	fatty acid binding protein 5, epidermal(Fabp5)	Rattus norvegicus
P54319	phospholipase A2, activating protein(Plaa)	Rattus norvegicus
P63029	tumor protein, translationally-controlled 1(Tpt1)	Rattus norvegicus
Q921A2	solute carrier family 2 member 13(Slc2a13)	Rattus norvegicus
B5DF65	biliverdin reductase B(Blvrb)	Rattus norvegicus
F1M4R7	chondroitin sulfate proteoglycan 5(Cspg5)	Rattus norvegicus
Q9ERQ6	chondroitin sulfate proteoglycan 5(Cspg5)	Rattus norvegicus
Q794F9	solute carrier family 3 member 2(Slc3a2)	Rattus norvegicus
Q66HA8	heat shock protein family H (Hsp110) member 1(Hsph1)	Rattus norvegicus
D3ZU74	dynein cytoplasmic 1 intermediate chain 2(Dync1i2)	Rattus norvegicus
Q99PF5	KH-type splicing regulatory protein(Khsrp)	Rattus norvegicus
P11730	calcium/calmodulin-dependent protein kinase II gamma(Camk2g)	Rattus norvegicus
D4A144	adhesion G protein-coupled receptor L1(Adgrl1)	Rattus norvegicus
E9PTX9	solute carrier family 12 member 2(Slc12a2)	Rattus norvegicus
Q6P502	chaperonin containing TCP1 subunit 3(Cct3)	Rattus norvegicus
D3ZKX8	family with sequence similarity 169, member A(Fam169a)	Rattus norvegicus
Q6TUE6	Rho GTPase activating protein 5(Arhgap5)	Rattus norvegicus
P19527	neurofilament, light polypeptide(Nefl)	Rattus norvegicus
O35458	solute carrier family 32 member 1(Slc32a1)	Rattus norvegicus
Q9JKB7	guanine deaminase(Gda)	Rattus norvegicus
Q920J4	thioredoxin-like 1(Txnl1)	Rattus norvegicus
Q05BA4	myeloid-associated differentiation marker(Myadm)	Rattus norvegicus
Q561S0	NADH dehydrogenase (ubiquinone) 1 alpha subcomplex 10-like 1(Ndufa10l1)	Rattus norvegicus
O35430	amyloid beta precursor protein binding family A member 1(Apba1)	Rattus norvegicus
Q62634	solute carrier family 17 member 7(Slc17a7)	Rattus norvegicus
F1M9G8	histidine triad nucleotide binding protein 3(Hint3)	Rattus norvegicus
D4AC23	chaperonin containing TCP1 subunit 7(Cct7)	Rattus norvegicus
P19490	glutamate ionotropic receptor AMPA type subunit 1(Gria1)	Rattus norvegicus
D4ACG7	copine 6(Cpne6)	Rattus norvegicus
Q1RP74	tubulin folding cofactor B(Tbcb)	Rattus norvegicus
P81795	eukaryotic translation initiation factor 2 subunit gamma(Eif2s3)	Rattus norvegicus
P62882	G protein subunit beta 5(Gnb5)	Rattus norvegicus
D3ZZ54	G protein subunit beta 5(Gnb5)	Rattus norvegicus
F1LUA1	early endosome antigen 1(Eea1)	Rattus norvegicus
Q63881	potassium voltage-gated channel subfamily D member 2(Kcnd2)	Rattus norvegicus
D4A3S6	metastasis suppressor 1-like(Mtss1l)	Rattus norvegicus
Q9JKE3	secretory carrier membrane protein 5(Scamp5)	Rattus norvegicus
P61206	ADP-ribosylation factor 3(Arf3)	Rattus norvegicus
P63004	platelet-activating factor acetylhydrolase 1b, regulatory subunit 1(Pafah1b1)	Rattus norvegicus
P63086	mitogen activated protein kinase 1(Mapk1)	Rattus norvegicus
F1M324	phospholipase C-like 2(Plcl2)	Rattus norvegicus
Q68FQ0	chaperonin containing TCP1 subunit 5(Cct5)	Rattus norvegicus
P32736	opioid binding protein/cell adhesion molecule-like(Opcml)	Rattus norvegicus
Q6RJR6	reticulon 3(Rtn3)	Rattus norvegicus
D3ZWA8	adaptor protein, phosphotyrosine interacting with PH domain and leucine zipper 1(Appl1)	Rattus norvegicus
Q52KS1	phosphofructokinase, muscle(Pfkm)	Rattus norvegicus
F1LP82	RAB2A, member RAS oncogene family(Rab2a)	Rattus norvegicus
D3ZQL7	tubulin polymerization promoting protein(Tppp)	Rattus norvegicus
Q8K4V4	sorting nexin family member 27(Snx27)	Rattus norvegicus
Q75Q39	translocase of outer mitochondrial membrane 70(Tomm70)	Rattus norvegicus
Q9JHU0	dihydropyrimidinase-like 5(Dpysl5)	Rattus norvegicus
Q01205	dihydrolipoamide S-succinyltransferase(Dlst)	Rattus norvegicus
Q6PCU0	ATP synthase, H+ transporting, mitochondrial F1 complex, gamma polypeptide 1(Atp5c1)	Rattus norvegicus
P19139	casein kinase 2 alpha 1(Csnk2a1)	Rattus norvegicus
D4A4F9	stum, mechanosensory transduction mediator homolog(Stum)	Rattus norvegicus
Q5EB55	1,4-alpha-glucan branching enzyme 1(Gbe1)	Rattus norvegicus
F1MAH8	CAP-GLY domain containing linker protein 1(Clip1)	Rattus norvegicus
Q5XI77	annexin A11(Anxa11)	Rattus norvegicus
Q9JLA3	UDP-glucose glycoprotein glucosyltransferase 1(Uggt1)	Rattus norvegicus
F1M9V7	aminopeptidase puromycin sensitive(Npepps)	Rattus norvegicus
Q6AXU4	ring finger protein 181(Rnf181)	Rattus norvegicus
Q99MZ4	gamma-glutamyltransferase 7(Ggt7)	Rattus norvegicus
Q9Z2L0	voltage-dependent anion channel 1(Vdac1)	Rattus norvegicus
P81155	voltage-dependent anion channel 2(Vdac2)	Rattus norvegicus
P08082	clathrin, light chain B(Cltb)	Rattus norvegicus
Q7TMB7	phospholipid phosphatase related 4(Plppr4)	Rattus norvegicus
Q9JHL4	drebrin-like(Dbnl)	Rattus norvegicus
Q80W89	NADH:ubiquinone oxidoreductase subunit A11(Ndufa11)	Rattus norvegicus
F1M978	inositol monophosphatase 1(Impa1)	Rattus norvegicus
Q8VBU2	NDRG family member 2(Ndrg2)	Rattus norvegicus
F1LPP6	A-kinase anchoring protein 5(Akap5)	Rattus norvegicus
P47861	synaptotagmin 5(Syt5)	Rattus norvegicus
D3ZLT1	NADH:ubiquinone oxidoreductase subunit B7(Ndufb7)	Rattus norvegicus
Q7TSP2	kinesin family member 15(Kif15)	Rattus norvegicus
F1LPB9	rabphilin 3A(Rph3a)	Rattus norvegicus
P47709	rabphilin 3A(Rph3a)	Rattus norvegicus
Q5XIF6	tubulin, alpha 4A(Tuba4a)	Rattus norvegicus
Q9Z1Y3	cadherin 2(Cdh2)	Rattus norvegicus
D4ACB8	chaperonin containing TCP1 subunit 8(Cct8)	Rattus norvegicus
P62824	RAB3C, member RAS oncogene family(Rab3c)	Rattus norvegicus
P69682	NECAP endocytosis associated 1(Necap1)	Rattus norvegicus
Q6P503	ATPase H+ transporting V1 subunit D(Atp6v1d)	Rattus norvegicus
P15999	ATP synthase, H+ transporting, mitochondrial F1 complex, alpha subunit 1, cardiac muscle(Atp5a1)	Rattus norvegicus
F1M7V6	cell adhesion molecule 4(Cadm4)	Rattus norvegicus
O70196	prolyl endopeptidase(Prep)	Rattus norvegicus
F1M8G9	neural cell adhesion molecule 2(Ncam2)	Rattus norvegicus
Q8SEZ5	COXII(COX2)	Rattus norvegicus
F1LM55	cell cycle and apoptosis regulator 2(Ccar2)	Rattus norvegicus
B2RYP0	ras homolog family member C(Rhoc)	Rattus norvegicus
P11608	ATPase subunit 8(ATP8)	Rattus norvegicus
Q923S8	pantothenate kinase 4(Pank4)	Rattus norvegicus
P49803	regulator of G-protein signaling 7(Rgs7)	Rattus norvegicus
D3ZWG2	regulator of G-protein signaling 7(Rgs7)	Rattus norvegicus
D3ZC55	heat shock protein family A (Hsp70) member 12A(Hspa12a)	Rattus norvegicus
P0C5Y8	alsin Rho guanine nucleotide exchange factor(Als2)	Rattus norvegicus
D4ABD7	thyroid hormone receptor interactor 11(Trip11)	Rattus norvegicus
P32851	syntaxin 1A(Stx1a)	Rattus norvegicus
F1LM47	succinate-CoA ligase ADP-forming beta subunit(Sucla2)	Rattus norvegicus
F1LQM9	exportin 7(Xpo7)	Rattus norvegicus
B5DF89	cullin 3(Cul3)	Rattus norvegicus
B4F772	heat shock protein 4-like(Hspa4l)	Rattus norvegicus
Q499N5	acyl-CoA synthetase family member 2(Acsf2)	Rattus norvegicus
B2RYG2	phosphoenolpyruvate carboxykinase 2 (mitochondrial)(Pck2)	Rattus norvegicus
D4A9D8	oxysterol binding protein(Osbp)	Rattus norvegicus
D3ZT20	F-box protein 41(Fbxo41)	Rattus norvegicus
P0C5X8	tweety family member 1(Ttyh1)	Rattus norvegicus
P82995	heat shock protein 90, alpha (cytosolic), class A member 1(Hsp90aa1)	Rattus norvegicus
P0C5W1	microtubule-associated protein 1S(Map1s)	Rattus norvegicus
Q4KLH4	paraspeckle component 1(Pspc1)	Rattus norvegicus
D4A054	RAN binding protein 2(Ranbp2)	Rattus norvegicus
F1LY04	kinase suppressor of ras 2(Ksr2)	Rattus norvegicus
C9WPN3	lysine demethylase 6A(Kdm6a)	Rattus norvegicus
Q5I0G4	glycyl-tRNA synthetase(Gars)	Rattus norvegicus
Q5U300	ubiquitin-like modifier activating enzyme 1(Uba1)	Rattus norvegicus
Q499R1	protein phosphatase 2, regulatory subunit B', delta(Ppp2r5d)	Rattus norvegicus
Q924N5	acyl-CoA synthetase bubblegum family member 1(Acsbg1)	Rattus norvegicus
B2GV54	neutral cholesterol ester hydrolase 1(Nceh1)	Rattus norvegicus
F1M403	ubiquitin-conjugating enzyme E2O(Ube2o)	Rattus norvegicus
B2GV73	actin related protein 2/3 complex, subunit 3(Arpc3)	Rattus norvegicus
D3ZQD3	oxoglutarate dehydrogenase-like(Ogdhl)	Rattus norvegicus
Q64361	latexin(Lxn)	Rattus norvegicus
B1WC61	acyl-CoA dehydrogenase family, member 9(Acad9)	Rattus norvegicus
Q5EBA4	nipsnap homolog 1 (C. elegans)(Nipsnap1)	Rattus norvegicus
D3ZT36	ADAM metallopeptidase domain 23(Adam23)	Rattus norvegicus
Q66HF1	NADH dehydrogenase (ubiquinone) Fe-S protein 1(Ndufs1)	Rattus norvegicus
D3ZAP9	glycerol-3-phosphate dehydrogenase 1-like(Gpd1l)	Rattus norvegicus
Q5XI78	oxoglutarate dehydrogenase(Ogdh)	Rattus norvegicus
Q5RK27	solute carrier family 12 member 7(Slc12a7)	Rattus norvegicus
P36201	cysteine-rich protein 2(Crip2)	Rattus norvegicus
D4A565	NADH:ubiquinone oxidoreductase subunit B5(Ndufb5)	Rattus norvegicus
D3ZNG0	adhesion G protein-coupled receptor L2(Adgrl2)	Rattus norvegicus
F1LPG3	phosphofurin acidic cluster sorting protein 1(Pacs1)	Rattus norvegicus
Q99ML5	prenylcysteine oxidase 1(Pcyox1)	Rattus norvegicus
Q4KM71	splicing factor proline and glutamine rich(Sfpq)	Rattus norvegicus
P20059	hemopexin(Hpx)	Rattus norvegicus
Q9QZM6	solute carrier family 24 member 1(Slc24a1)	Rattus norvegicus
F1LU71	AU RNA binding methylglutaconyl-CoA hydratase(Auh)	Rattus norvegicus
D3KR63	Rap guanine nucleotide exchange factor 4(Rapgef4)	Rattus norvegicus
Q62636	RAP1B, member of RAS oncogene family(Rap1b)	Rattus norvegicus
O88377	phosphatidylinositol-5-phosphate 4-kinase type 2 beta(Pip4k2b)	Rattus norvegicus
Q9EPH8	poly(A) binding protein, cytoplasmic 1(Pabpc1)	Rattus norvegicus
Q3MHS9	chaperonin containing TCP1 subunit 6A(Cct6a)	Rattus norvegicus
O88407	Fas apoptotic inhibitory molecule 2(Faim2)	Rattus norvegicus
O08875	doublecortin-like kinase 1(Dclk1)	Rattus norvegicus
F1LVC3	RAB6B, member RAS oncogene family(Rab6b)	Rattus norvegicus
B2GVB4	septin 9(Sept9)	Rattus norvegicus
P19511	ATP synthase, H+ transporting, mitochondrial Fo complex, subunit B1(Atp5f1)	Rattus norvegicus
P10719	ATP synthase, H+ transporting, mitochondrial F1 complex, beta polypeptide(Atp5b)	Rattus norvegicus
P19804	NME/NM23 nucleoside diphosphate kinase 2(Nme2)	Rattus norvegicus
Q9JKS6	piccolo (presynaptic cytomatrix protein)(Pclo)	Rattus norvegicus
F1LNP4	solute carrier family 12 member 5(Slc12a5)	Rattus norvegicus
Q6JAM9	transmembrane protein 35(Tmem35)	Rattus norvegicus
P85972	vinculin(Vcl)	Rattus norvegicus
D3ZWQ0	proline-rich transmembrane protein 3(Prrt3)	Rattus norvegicus
Q8VI04	asparaginase like 1(Asrgl1)	Rattus norvegicus
P55067	neurocan(Ncan)	Rattus norvegicus
D3ZBU7	similar to putative protein (5S487)(RGD1310819)	Rattus norvegicus
Q9QXU8	dynein cytoplasmic 1 light intermediate chain 1(Dync1li1)	Rattus norvegicus
Q4QQT7	epidermal growth factor receptor pathway substrate 15-like 1(Eps15l1)	Rattus norvegicus
D3ZUX5	coiled-coil-helix-coiled-coil-helix domain containing 3(Chchd3)	Rattus norvegicus
D3Z9H2	hyaluronan and proteoglycan link protein 4(Hapln4)	Rattus norvegicus
F1LQN3	reticulon 4(Rtn4)	Rattus norvegicus
P24268	cathepsin D(Ctsd)	Rattus norvegicus
Q62936	discs large MAGUK scaffold protein 3(Dlg3)	Rattus norvegicus
Q9JLT5	wolframin ER transmembrane glycoprotein(Wfs1)	Rattus norvegicus
E9PT53	wolframin ER transmembrane glycoprotein(Wfs1)	Rattus norvegicus
P63170	dynein light chain LC8-type 1(Dynll1)	Rattus norvegicus
Q8K4Y5	leucine-rich, glioma inactivated 1(Lgi1)	Rattus norvegicus
D3ZIP8	endonuclease domain containing 1(Endod1)	Rattus norvegicus
Q6AXX6	similar to RIKEN cDNA 5730469M10(RGD1309676)	Rattus norvegicus
P63047	sulfotransferase family 4A, member 1(Sult4a1)	Rattus norvegicus
Q62609	olfactomedin 1(Olfm1)	Rattus norvegicus
Q5RKI1	eukaryotic translation initiation factor 4A2(Eif4a2)	Rattus norvegicus
F1LRN3	septin 6(Sept6)	Rattus norvegicus
B5DFG5	septin 6(Sept6)	Rattus norvegicus
Q5BJU7	WAS protein family, member 1(Wasf1)	Rattus norvegicus
Q5XIF3	NADH:ubiquinone oxidoreductase subunit S4(Ndufs4)	Rattus norvegicus
O35095	neurochondrin(Ncdn)	Rattus norvegicus
P10860	glutamate dehydrogenase 1(Glud1)	Rattus norvegicus
Q76GL9	solute carrier family 1 member 4(Slc1a4)	Rattus norvegicus
P13264	glutaminase(Gls)	Rattus norvegicus
F1MAA5	RAN GTPase activating protein 1(Rangap1)	Rattus norvegicus
P02650	apolipoprotein E(Apoe)	Rattus norvegicus
P08050	gap junction protein, alpha 1(Gja1)	Rattus norvegicus
P30835	phosphofructokinase, liver type(Pfkl)	Rattus norvegicus
P19627	G protein subunit alpha z(Gnaz)	Rattus norvegicus
B2GV03	phosphorylase, glycogen; brain(Pygb)	Rattus norvegicus
P47819	glial fibrillary acidic protein(Gfap)	Rattus norvegicus
P31421	glutamate metabotropic receptor 2(Grm2)	Rattus norvegicus
A2VCW8	septin 7(Sept7)	Rattus norvegicus
B5DFG2	heterogeneous nuclear ribonucleoprotein L(Hnrnpl)	Rattus norvegicus
F1LPP9	heterogeneous nuclear ribonucleoprotein L(Hnrnpl)	Rattus norvegicus
P54311	G protein subunit beta 1(Gnb1)	Rattus norvegicus
P13221	glutamic-oxaloacetic transaminase 1(Got1)	Rattus norvegicus
P70566	tropomodulin 2(Tmod2)	Rattus norvegicus
Q9JLZ1	glutaredoxin 3(Glrx3)	Rattus norvegicus
D3ZLC1	lamin B2(Lmnb2)	Rattus norvegicus
P04906	glutathione S-transferase pi 1(Gstp1)	Rattus norvegicus
D3ZW08	adenylosuccinate lyase(Adsl)	Rattus norvegicus
O54755	NADH:ubiquinone oxidoreductase subunit V3(Ndufv3)	Rattus norvegicus
Q3B8P6	ALG2, alpha-1,3/1,6-mannosyltransferase(Alg2)	Rattus norvegicus
P24155	thimet oligopeptidase 1(Thop1)	Rattus norvegicus
O08700	vacuolar protein sorting 45(Vps45)	Rattus norvegicus
Q4FZT9	proteasome 26S subunit, non-ATPase 2(Psmd2)	Rattus norvegicus
P02091	hemoglobin subunit beta(Hbb)	Rattus norvegicus
D4AD15	eukaryotic translation initiation factor 4 gamma, 1(Eif4g1)	Rattus norvegicus
P50137	transketolase(Tkt)	Rattus norvegicus
Q9JJW1	tetraspanin 2(Tspan2)	Rattus norvegicus
P62804	histone cluster 1, H4b(Hist1h4b)	Rattus norvegicus
P07323	enolase 2, gamma, neuronal(Eno2)	Rattus norvegicus
B2RYS2	ubiquinol-cytochrome c reductase binding protein(Uqcrb)	Rattus norvegicus
P04764	enolase 1(Eno1)	Rattus norvegicus
Q5M7U6	ARP2 actin related protein 2 homolog(Actr2)	Rattus norvegicus
O54922	exocyst complex component 7(Exoc7)	Rattus norvegicus
Q7TPB7	mal, T-cell differentiation protein 2(Mal2)	Rattus norvegicus
O88565	RAB5A, member RAS oncogene family(Rab5a)	Rattus norvegicus
Q66X93	staphylococcal nuclease and tudor domain containing 1(Snd1)	Rattus norvegicus
O08651	phosphoglycerate dehydrogenase(Phgdh)	Rattus norvegicus
Q6XD99	spectrin, beta, non-erythrocytic 1(Sptbn1)	Rattus norvegicus
P04166	cytochrome b5 type B(Cyb5b)	Rattus norvegicus
B2RYI6	sorting nexin 4(Snx4)	Rattus norvegicus
P55161	NCK-associated protein 1(Nckap1)	Rattus norvegicus
D3ZF26	tankyrase 1 binding protein 1(Tnks1bp1)	Rattus norvegicus
D3ZTN0	protein kinase, DNA activated, catalytic polypeptide(Prkdc)	Rattus norvegicus
Q5BKC9	neuronal guanine nucleotide exchange factor(Ngef)	Rattus norvegicus
Q4V8C1	tubulin tyrosine ligase like 8(Ttll8)	Rattus norvegicus
D3ZJH9	malic enzyme 2(Me2)	Rattus norvegicus
P05370	glucose-6-phosphate dehydrogenase(G6pd)	Rattus norvegicus
Q9Z270	VAMP associated protein A(Vapa)	Rattus norvegicus
D3ZXF8	mitochondrial ribosomal protein L43(Mrpl43)	Rattus norvegicus
P18088	glutamate decarboxylase 1(Gad1)	Rattus norvegicus
Q05683	glutamate decarboxylase 2(Gad2)	Rattus norvegicus
P04797	glyceraldehyde-3-phosphate dehydrogenase(Gapdh)	Rattus norvegicus
P14408	fumarate hydratase(Fh)	Rattus norvegicus
Q9WVR7	protein phosphatase, Mg2+/Mn2+ dependent, 1F(Ppm1f)	Rattus norvegicus
Q62656	protein tyrosine phosphatase, receptor type Z1(Ptprz1)	Rattus norvegicus
D3ZG43	NADH dehydrogenase (ubiquinone) Fe-S protein 3(Ndufs3)	Rattus norvegicus
P22062	protein-L-isoaspartate (D-aspartate) O-methyltransferase 1(Pcmt1)	Rattus norvegicus
Q80WF4	transmembrane protein 132A(Tmem132a)	Rattus norvegicus
P30009	myristoylated alanine rich protein kinase C substrate(Marcks)	Rattus norvegicus
F1LMW7	myristoylated alanine rich protein kinase C substrate(Marcks)	Rattus norvegicus
Q5RJN0	NADH dehydrogenase (ubiquinone) Fe-S protein 7(Ndufs7)	Rattus norvegicus
Q499P2	leukotriene A4 hydrolase(Lta4h)	Rattus norvegicus
P11980	pyruvate kinase, muscle(Pkm)	Rattus norvegicus
Q6P7S0	pyruvate kinase, muscle(Pkm)	Rattus norvegicus
P42123	lactate dehydrogenase B(Ldhb)	Rattus norvegicus
P04642	lactate dehydrogenase A(Ldha)	Rattus norvegicus
F1M542	ADAM metallopeptidase domain 22(Adam22)	Rattus norvegicus
D4A0A1	SOGA family member 3(Soga3)	Rattus norvegicus
P41499	protein tyrosine phosphatase, non-receptor type 11(Ptpn11)	Rattus norvegicus
Q6P9V1	Cd81 molecule(Cd81)	Rattus norvegicus
Q566E4	heterogeneous nuclear ribonucleoprotein R(Hnrnpr)	Rattus norvegicus
F1LXA0	NADH:ubiquinone oxidoreductase subunit A12(Ndufa12)	Rattus norvegicus
P06761	heat shock protein family A member 5(Hspa5)	Rattus norvegicus
O88989	malate dehydrogenase 1(Mdh1)	Rattus norvegicus
F1M8A4	PTPRF interacting protein alpha 2(Ppfia2)	Rattus norvegicus
Q6P2A7	flotillin 1(Flot1)	Rattus norvegicus
Q75N36	DnaJ heat shock protein family (Hsp40) member C7(Dnajc7)	Rattus norvegicus
P02688	myelin basic protein(Mbp)	Rattus norvegicus
Q63345	myelin oligodendrocyte glycoprotein(Mog)	Rattus norvegicus
Q62658	FK506 binding protein 1a(Fkbp1a)	Rattus norvegicus
P01946	hemoglobin, alpha 1(Hba1)	Rattus norvegicus
P13697	malic enzyme 1(Me1)	Rattus norvegicus
B2RZ08	transmembrane protein 263(Tmem263)	Rattus norvegicus
F1LN92	AFG3 like matrix AAA peptidase subunit 2(Afg3l2)	Rattus norvegicus
D3ZDU2	regulatory associated protein of MTOR, complex 1(Rptor)	Rattus norvegicus
D4ABN3	synaptojanin 1(Synj1)	Rattus norvegicus
P85108	tubulin, beta 2A class IIa(Tubb2a)	Rattus norvegicus
Q5RKI0	WD repeat domain 1(Wdr1)	Rattus norvegicus
Q66HD0	heat shock protein 90 beta family member 1(Hsp90b1)	Rattus norvegicus
P85973	purine nucleoside phosphorylase(Pnp)	Rattus norvegicus
Q5XIN6	leucine zipper and EF-hand containing transmembrane protein 1(Letm1)	Rattus norvegicus
Q6KC51	actin binding LIM protein family, member 2(Ablim2)	Rattus norvegicus
P48768	solute carrier family 8 member A2(Slc8a2)	Rattus norvegicus
P07340	ATPase Na+/K+ transporting subunit beta 1(Atp1b1)	Rattus norvegicus
B0K020	CDGSH iron sulfur domain 1(Cisd1)	Rattus norvegicus
Q5RKJ9	RAB10, member RAS oncogene family(Rab10)	Rattus norvegicus
B1WC64	cytochrome P450, family 46, subfamily a, polypeptide 1(Cyp46a1)	Rattus norvegicus
A9CMA6	transmembrane protein 163(Tmem163)	Rattus norvegicus
B0BN30	mitochondrial carrier 1(Mtch1)	Rattus norvegicus
P49432	pyruvate dehydrogenase (lipoamide) beta(Pdhb)	Rattus norvegicus
Q4QRB4	tubulin, beta 3 class III(Tubb3)	Rattus norvegicus
Q6P7Q4	glyoxalase 1(Glo1)	Rattus norvegicus
P56571	homolog of zebrafish ES1(RGD1303003)	Rattus norvegicus
P63018	heat shock protein family A (Hsp70) member 8(Hspa8)	Rattus norvegicus
Q0QER8	isocitrate dehydrogenase (NADP(+)) 1, cytosolic(Idh1)	Rattus norvegicus
P10824	G protein subunit alpha i1(Gnai1)	Rattus norvegicus
B6DTP5	DEAD-box helicase 5(Ddx5)	Rattus norvegicus
D4AB17	phosphoribosylformylglycinamidine synthase-like(LOC100912917)	Rattus norvegicus
Q08406	ciliary neurotrophic factor receptor(Cntfr)	Rattus norvegicus
Q5HZV9	protein phosphatase 1, regulatory subunit 7(Ppp1r7)	Rattus norvegicus
P00507	glutamic-oxaloacetic transaminase 2(Got2)	Rattus norvegicus
B0BN63	activator of Hsp90 ATPase activity 1(Ahsa1)	Rattus norvegicus
Q63965	sideroflexin 1(Sfxn1)	Rattus norvegicus
P09456	protein kinase cAMP-dependent type 1 regulatory subunit alpha(Prkar1a)	Rattus norvegicus
P23565	internexin neuronal intermediate filament protein, alpha(Ina)	Rattus norvegicus
Q1WIM3	cell adhesion molecule 3(Cadm3)	Rattus norvegicus
F1LTE0	tetratricopeptide repeat, ankyrin repeat and coiled-coil containing 2(Tanc2)	Rattus norvegicus
P21707	synaptotagmin 1(Syt1)	Rattus norvegicus
P85515	ARP1 actin-related protein 1 homolog A, centractin alpha(Actr1a)	Rattus norvegicus
D4ADE8	DEAD-box helicase 3, X-linked(Ddx3x)	Rattus norvegicus
F1LQ45	epsin 2(Epn2)	Rattus norvegicus
Q792I0	lin-7 homolog C, crumbs cell polarity complex component(Lin7c)	Rattus norvegicus
Q05962	solute carrier family 25 member 4(Slc25a4)	Rattus norvegicus
B0BNF1	septin 8(Sept8)	Rattus norvegicus
D3Z941	methionyl-tRNA synthetase(Mars)	Rattus norvegicus
Q5XIG8	serine/threonine kinase receptor associated protein(Strap)	Rattus norvegicus
F1LPS8	purine rich element binding protein A(Pura)	Rattus norvegicus
Q6AYH5	dynactin subunit 2(Dctn2)	Rattus norvegicus
P47860	phosphofructokinase, platelet(Pfkp)	Rattus norvegicus
F1LSE6	PTPRF interacting protein alpha 3(Ppfia3)	Rattus norvegicus
B2RYS8	NADH:ubiquinone oxidoreductase subunit B8(Ndufb8)	Rattus norvegicus
Q6DGF2	clathrin interactor 1(Clint1)	Rattus norvegicus
F1M6Y8	BR serine/threonine kinase 1(Brsk1)	Rattus norvegicus
Q5QD51	A-kinase anchoring protein 12(Akap12)	Rattus norvegicus
P09117	aldolase, fructose-bisphosphate C(Aldoc)	Rattus norvegicus
P63245	receptor for activated C kinase 1(Rack1)	Rattus norvegicus
P05065	aldolase, fructose-bisphosphate A(Aldoa)	Rattus norvegicus
D3ZGE6	cortactin(Cttn)	Rattus norvegicus
P02770	albumin(Alb)	Rattus norvegicus
O70257	syntaxin 7(Stx7)	Rattus norvegicus
P39069	adenylate kinase 1(Ak1)	Rattus norvegicus
Q6QLM7	kinesin family member 5A(Kif5a)	Rattus norvegicus
Q05764	adducin 2(Add2)	Rattus norvegicus
D3ZZ99	adducin 1(Add1)	Rattus norvegicus
Q63028	adducin 1(Add1)	Rattus norvegicus
D3ZGN2	copine 5(Cpne5)	Rattus norvegicus
Q6PST4	atlastin GTPase 1(Atl1)	Rattus norvegicus
P41498	acid phosphatase 1, soluble(Acp1)	Rattus norvegicus
Q4V8I6	ribosomal protein L11(Rpl11)	Rattus norvegicus
P62944	adaptor-related protein complex 2, beta 1 subunit(Ap2b1)	Rattus norvegicus
D3ZAA9	membrane palmitoylated protein 2(Mpp2)	Rattus norvegicus
P53678	adaptor-related protein complex 3, mu 2 subunit(Ap3m2)	Rattus norvegicus
O88600	heat shock protein family A member 4(Hspa4)	Rattus norvegicus
Q9Z1X8	F-box protein 2(Fbxo2)	Rattus norvegicus
E2RUH2	ribonuclease/angiogenin inhibitor 1(Rnh1)	Rattus norvegicus
Q6AXT5	RAB21, member RAS oncogene family(Rab21)	Rattus norvegicus
D4AA63	ubiquilin 2(Ubqln2)	Rattus norvegicus
P35332	hippocalcin-like 4(Hpcal4)	Rattus norvegicus
P62909	ribosomal protein S3(Rps3)	Rattus norvegicus
P62250	ribosomal protein S16(Rps16)	Rattus norvegicus
Q5PQK2	fused in sarcoma RNA binding protein(Fus)	Rattus norvegicus
P50475	alanyl-tRNA synthetase(Aars)	Rattus norvegicus
P47971	neuronal pentraxin 1(Nptx1)	Rattus norvegicus
Q62718	neurotrimin(Ntm)	Rattus norvegicus
Q80U96	exportin 1(Xpo1)	Rattus norvegicus
P86182	coiled-coil domain containing 22(Ccdc22)	Rattus norvegicus
P70627	folate hydrolase 1(Folh1)	Rattus norvegicus
Q5M7T6	ATPase H+ transporting V0 subunit D1(Atp6v0d1)	Rattus norvegicus
D4A8C3	preferentially expressed antigen in melanoma-like 3(Pramel3)	Rattus norvegicus
D4A772	dystrobrevin, alpha(Dtna)	Rattus norvegicus
Q03555	gephyrin(Gphn)	Rattus norvegicus
P62703	ribosomal protein S4, X-linked(Rps4x)	Rattus norvegicus
Q6IRH6	solute carrier family 25 member 3(Slc25a3)	Rattus norvegicus
O54924	exocyst complex component 8(Exoc8)	Rattus norvegicus
F1LT49	leucine rich repeat containing 47(Lrrc47)	Rattus norvegicus
Q5XIM9	chaperonin containing TCP1 subunit 2(Cct2)	Rattus norvegicus
P29419	ATP synthase, H+ transporting, mitochondrial Fo complex, subunit E(Atp5i)	Rattus norvegicus
Q4KM49	tyrosyl-tRNA synthetase(Yars)	Rattus norvegicus
F1LST2	Rho GTPase activating protein 44(Arhgap44)	Rattus norvegicus
P35434	ATP synthase, H+ transporting, mitochondrial F1 complex, delta subunit(Atp5d)	Rattus norvegicus
P23965	enoyl-CoA delta isomerase 1(Eci1)	Rattus norvegicus
D3ZZM8	similar to methylenetetrahydrofolate dehydrogenase (NADP+ dependent), methenyltetrahydrofolate cyclohydrolase, formyltetrahydrofolate synthase(LOC680432)	Rattus norvegicus
P70580	progesterone receptor membrane component 1(Pgrmc1)	Rattus norvegicus
D3ZE17	CASK interacting protein 1(Caskin1)	Rattus norvegicus
D3ZVQ0	ubiquitin specific peptidase 5(Usp5)	Rattus norvegicus
Q5PPH0	enolase-phosphatase 1(Enoph1)	Rattus norvegicus
F1M7K7	calcium voltage-gated channel auxiliary subunit gamma 8(Cacng8)	Rattus norvegicus
Q78P75	dynein light chain LC8-type 2(Dynll2)	Rattus norvegicus
Q2I6B2	ATPase H+ transporting V0 subunit a1(Atp6v0a1)	Rattus norvegicus
D4ACY5	ATPase H+ transporting V0 subunit a1(Atp6v0a1)	Rattus norvegicus
Q5FVI6	ATPase H+ transporting V1 subunit C1(Atp6v1c1)	Rattus norvegicus
P62260	tyrosine 3-monooxygenase/tryptophan 5-monooxygenase activation protein, epsilon(Ywhae)	Rattus norvegicus
P63100	protein phosphatase 3, regulatory subunit B, alpha(Ppp3r1)	Rattus norvegicus
D3ZAY7	erythrocyte membrane protein band 4.1-like 2(Epb41l2)	Rattus norvegicus
P07335	creatine kinase B(Ckb)	Rattus norvegicus
D4A5X7	ganglioside-induced differentiation-associated-protein 1(Gdap1)	Rattus norvegicus
P14046	alpha-1-inhibitor III(LOC297568)	Rattus norvegicus
Q6PCU2	ATPase H+ transporting V1 subunit E1(Atp6v1e1)	Rattus norvegicus
P21575	dynamin 1(Dnm1)	Rattus norvegicus
Q9Z0W5	protein kinase C and casein kinase substrate in neurons 1(Pacsin1)	Rattus norvegicus
P54921	NSF attachment protein alpha(Napa)	Rattus norvegicus
Q5XI73	Rho GDP dissociation inhibitor alpha(Arhgdia)	Rattus norvegicus
Q01728	solute carrier family 8 member A1(Slc8a1)	Rattus norvegicus
Q6JE36	N-myc downstream regulated 1(Ndrg1)	Rattus norvegicus
P18421	proteasome subunit beta 1(Psmb1)	Rattus norvegicus
P06685	ATPase Na+/K+ transporting subunit alpha 1(Atp1a1)	Rattus norvegicus
B0BMW0	RAB14, member RAS oncogene family(Rab14)	Rattus norvegicus
Q80Z30	protein phosphatase, Mg2+/Mn2+ dependent, 1E(Ppm1e)	Rattus norvegicus
P06687	ATPase Na+/K+ transporting subunit alpha 3(Atp1a3)	Rattus norvegicus
P06686	ATPase Na+/K+ transporting subunit alpha 2(Atp1a2)	Rattus norvegicus
P12075	cytochrome c oxidase subunit 5B(Cox5b)	Rattus norvegicus
P11506	ATPase plasma membrane Ca2+ transporting 2(Atp2b2)	Rattus norvegicus
P13638	ATPase Na+/K+ transporting subunit beta 2(Atp1b2)	Rattus norvegicus
E9PT29	DEAD-box helicase 17(Ddx17)	Rattus norvegicus
E9PSJ4	sperm associated antigen 9(Spag9)	Rattus norvegicus
P07943	aldo-keto reductase family 1 member B(Akr1b1)	Rattus norvegicus
B3GNI6	septin 11(Sept11)	Rattus norvegicus
B2RZ72	actin related protein 2/3 complex, subunit 4(Arpc4)	Rattus norvegicus
B2GUZ9	family with sequence similarity 49, member B(Fam49b)	Rattus norvegicus
Q5FVM4	non-POU domain containing, octamer-binding(Nono)	Rattus norvegicus
P13676	acylaminoacyl-peptide hydrolase(Apeh)	Rattus norvegicus
D3ZKK5	myotubularin related protein 1(Mtmr1)	Rattus norvegicus
O88480	calcineurin binding protein 1(Cabin1)	Rattus norvegicus
P21708	mitogen activated protein kinase 3(Mapk3)	Rattus norvegicus
O35077	glycerol-3-phosphate dehydrogenase 1(Gpd1)	Rattus norvegicus
O35244	peroxiredoxin 6(Prdx6)	Rattus norvegicus
B2RYW3	NADH:ubiquinone oxidoreductase subunit B9(Ndufb9)	Rattus norvegicus
Q9ERH3	WD repeat domain 7(Wdr7)	Rattus norvegicus
O08838	amphiphysin(Amph)	Rattus norvegicus
P15791	calcium/calmodulin-dependent protein kinase II delta(Camk2d)	Rattus norvegicus
Q63416	inter-alpha trypsin inhibitor, heavy chain 3(Itih3)	Rattus norvegicus
P08413	calcium/calmodulin-dependent protein kinase II beta(Camk2b)	Rattus norvegicus
Q68FX0	isocitrate dehydrogenase 3 (NAD+) beta(Idh3B)	Rattus norvegicus
P04762	catalase(Cat)	Rattus norvegicus
Q6MG06	G protein nucleolar 1(Gnl1)	Rattus norvegicus
F1LMZ8	proteasome 26S subunit, non-ATPase 11(Psmd11)	Rattus norvegicus
Q2IBD4	cortactin binding protein 2(Cttnbp2)	Rattus norvegicus
Q6AYD2	oligonucleotide/oligosaccharide-binding fold containing 1(Obfc1)	Rattus norvegicus
Q63016	solute carrier family 7 member 5(Slc7a5)	Rattus norvegicus
D3ZPR0	chromosome segregation 1 like(Cse1l)	Rattus norvegicus
P52303	adaptor-related protein complex 1, beta 1 subunit(Ap1b1)	Rattus norvegicus
P50399	GDP dissociation inhibitor 2(Gdi2)	Rattus norvegicus
P70500	CDP-diacylglycerol--inositol 3-phosphatidyltransferase(Cdipt)	Rattus norvegicus
P21531	ribosomal protein L3(Rpl3)	Rattus norvegicus
Q8K4M9	oxysterol binding protein-like 1A(Osbpl1a)	Rattus norvegicus
Q4KSH6	mitogen activated protein kinase kinase 4(Map2k4)	Rattus norvegicus
Q63564	synaptic vesicle glycoprotein 2b(Sv2b)	Rattus norvegicus
Q75Q41	translocase of outer mitochondrial membrane 22(Tomm22)	Rattus norvegicus
Q63610	tropomyosin 3(Tpm3)	Rattus norvegicus
Q63525	nuclear distribution C, dynein complex regulator(Nudc)	Rattus norvegicus
Q02563	synaptic vesicle glycoprotein 2a(Sv2a)	Rattus norvegicus
Q8VIJ5	meningioma expressed antigen 5 (hyaluronidase)(Mgea5)	Rattus norvegicus
B0BNE6	NADH:ubiquinone oxidoreductase core subunit S8(Ndufs8)	Rattus norvegicus
Q7TQ90	alcohol dehydrogenase 4 (class II), pi polypeptide(Adh4)	Rattus norvegicus
Q5XIH3	NADH:ubiquinone oxidoreductase core subunit V1(Ndufv1)	Rattus norvegicus
Q5XI58	calicin(Ccin)	Rattus norvegicus
O35814	stress-induced phosphoprotein 1(Stip1)	Rattus norvegicus
Q2PQA9	kinesin family member 5B(Kif5b)	Rattus norvegicus
D3ZUE2	coronin 7(Coro7)	Rattus norvegicus
F1LY09	ARP3 actin related protein 3 homolog B(Actr3b)	Rattus norvegicus
P14562	lysosomal-associated membrane protein 1(Lamp1)	Rattus norvegicus
Q6GMN2	BAI1-associated protein 2(Baiap2)	Rattus norvegicus
P47863	aquaporin 4(Aqp4)	Rattus norvegicus
D3ZL30	microtubule associated serine/threonine kinase 3(Mast3)	Rattus norvegicus
P84083	ADP-ribosylation factor 5(Arf5)	Rattus norvegicus
Q9JI66	solute carrier family 4 member 4(Slc4a4)	Rattus norvegicus
Q6XVN8	microtubule-associated protein 1 light chain 3 alpha(Map1lc3a)	Rattus norvegicus
Q9JI12	solute carrier family 17 member 6(Slc17a6)	Rattus norvegicus
P18163	acyl-CoA synthetase long-chain family member 1(Acsl1)	Rattus norvegicus
Q4KM73	cytidine/uridine monophosphate kinase 1(Cmpk1)	Rattus norvegicus
D3ZAF6	ATP synthase, H+ transporting, mitochondrial Fo complex, subunit F2(Atp5j2)	Rattus norvegicus
P15650	acyl-CoA dehydrogenase, long chain(Acadl)	Rattus norvegicus
Q68FW9	COP9 signalosome subunit 3(Cops3)	Rattus norvegicus
Q4V8B0	oxidation resistance 1(Oxr1)	Rattus norvegicus
D3ZFQ8	cytochrome c-1(Cyc1)	Rattus norvegicus
P19468	glutamate-cysteine ligase, catalytic subunit(Gclc)	Rattus norvegicus
P56536	kinesin family member 5C(Kif5c)	Rattus norvegicus
O35796	complement C1q binding protein(C1qbp)	Rattus norvegicus
Q91Y81	septin 2(Sept2)	Rattus norvegicus
P60905	DnaJ heat shock protein family (Hsp40) member C5(Dnajc5)	Rattus norvegicus
P14841	cystatin C(Cst3)	Rattus norvegicus
P40307	proteasome subunit beta 2(Psmb2)	Rattus norvegicus
D4ABR6	annexin A6(Anxa6)	Rattus norvegicus
P28073	proteasome subunit beta 6(Psmb6)	Rattus norvegicus
P62828	RAN, member RAS oncogene family(Ran)	Rattus norvegicus
Q5BJT9	creatine kinase, mitochondrial 1B(Ckmt1b)	Rattus norvegicus
P62775	myotrophin(Mtpn)	Rattus norvegicus
P23978	solute carrier family 6 member 1(Slc6a1)	Rattus norvegicus
P31647	solute carrier family 6 member 11(Slc6a11)	Rattus norvegicus
Q64568	ATPase plasma membrane Ca2+ transporting 3(Atp2b3)	Rattus norvegicus
P11505	ATPase plasma membrane Ca2+ transporting 1(Atp2b1)	Rattus norvegicus
Q9R063	peroxiredoxin 5(Prdx5)	Rattus norvegicus
B2RYG6	OTU deubiquitinase, ubiquitin aldehyde binding 1(Otub1)	Rattus norvegicus
Q63754	synuclein, beta(Sncb)	Rattus norvegicus
Q6IRG7	claudin 11(Cldn11)	Rattus norvegicus
Q62688	phospholipase C-like 1(Plcl1)	Rattus norvegicus
F1M3P6	suppressor of cancer cell invasion(Scai)	Rattus norvegicus
D4A7R0	signal recognition particle 72(Srp72)	Rattus norvegicus
P24329	thiosulfate sulfurtransferase(Tst)	Rattus norvegicus
P13233	2',3'-cyclic nucleotide 3' phosphodiesterase(Cnp)	Rattus norvegicus
B5DF41	syntaphilin(Snph)	Rattus norvegicus
D3ZYN2	kinesin family member 21A(Kif21a)	Rattus norvegicus
Q68FR6	eukaryotic translation elongation factor 1 gamma(Eef1g)	Rattus norvegicus
F1LM82	heterogeneous nuclear ribonucleoprotein A2/B1(Hnrnpa2b1)	Rattus norvegicus
F1LNE4	glutamate ionotropic receptor AMPA type subunit 2(Gria2)	Rattus norvegicus
D3ZFP6	TOPBP1-interacting checkpoint and replication regulator(Ticrr)	Rattus norvegicus
P62815	ATPase H+ transporting V1 subunit B2(Atp6v1b2)	Rattus norvegicus
B1H2A6	FMR1 autosomal homolog 2(Fxr2)	Rattus norvegicus
Q62847	adducin 3(Add3)	Rattus norvegicus
P08482	cholinergic receptor, muscarinic 1(Chrm1)	Rattus norvegicus
F1M6V1	heterochromatin protein 1, binding protein 3(Hp1bp3)	Rattus norvegicus
P19492	glutamate ionotropic receptor AMPA type subunit 3(Gria3)	Rattus norvegicus
D4AE00	adaptor-related protein complex 3, beta 2 subunit(Ap3b2)	Rattus norvegicus
Q9JIR4	regulating synaptic membrane exocytosis 1(Rims1)	Rattus norvegicus
F1MAK3	Rho GTPase activating protein 32(Arhgap32)	Rattus norvegicus
Q6AXV4	SAMM50 sorting and assembly machinery component(Samm50)	Rattus norvegicus
Q9JLJ3	aldehyde dehydrogenase 9 family, member A1(Aldh9a1)	Rattus norvegicus
Q6GT74	basigin(Bsg)	Rattus norvegicus
F1LZW6	solute carrier family 25 member 13(Slc25a13)	Rattus norvegicus
D4AD05	ciliary rootlet coiled-coil, rootletin(Crocc)	Rattus norvegicus
Q62812	myosin, heavy chain 9, non-muscle(Myh9)	Rattus norvegicus
Q6TXE9	glutamyl-prolyl-tRNA synthetase(Eprs)	Rattus norvegicus
D4AAR7	coiled-coil domain containing 136(Ccdc136)	Rattus norvegicus
Q63372	neurexin 1(Nrxn1)	Rattus norvegicus
P16446	phosphatidylinositol transfer protein, alpha(Pitpna)	Rattus norvegicus
D4AE96	importin 7(Ipo7)	Rattus norvegicus
P56603	secretory carrier membrane protein 1(Scamp1)	Rattus norvegicus
D3ZBH0	cAMP responsive element binding protein 5(Creb5)	Rattus norvegicus
O88453	scaffold attachment factor B(Safb)	Rattus norvegicus
P11348	quinoid dihydropteridine reductase(Qdpr)	Rattus norvegicus
F1MAL6	plectin(Plec)	Rattus norvegicus
P19945	ribosomal protein lateral stalk subunit P0(Rplp0)	Rattus norvegicus
F1MAA3	serine/threonine-protein phosphatase 2A 56 kDa regulatory subunit delta isoform-like(LOC100909464)	Rattus norvegicus
P18418	calreticulin(Calr)	Rattus norvegicus
P97700	solute carrier family 25 member 11(Slc25a11)	Rattus norvegicus
P34926	microtubule-associated protein 1A(Map1a)	Rattus norvegicus
F1LQ81	N-ethylmaleimide sensitive factor, vesicle fusing ATPase(Nsf)	Rattus norvegicus
Q63100	dynein cytoplasmic 1 intermediate chain 1(Dync1i1)	Rattus norvegicus
P05197	eukaryotic translation elongation factor 2(Eef2)	Rattus norvegicus
P60892	phosphoribosyl pyrophosphate synthetase 1(Prps1)	Rattus norvegicus
P97852	hydroxysteroid (17-beta) dehydrogenase 4(Hsd17b4)	Rattus norvegicus
Q68FQ9	LanC like 2(Lancl2)	Rattus norvegicus
Q62813	limbic system-associated membrane protein(Lsamp)	Rattus norvegicus
Q9QZM5	abl-interactor 1(Abi1)	Rattus norvegicus
D4A6P1	seizure related 6 homolog like 2(Sez6l2)	Rattus norvegicus
P31044	phosphatidylethanolamine binding protein 1(Pebp1)	Rattus norvegicus
P48679	lamin A/C(Lmna)	Rattus norvegicus
E9PSV5	phosphoserine aminotransferase 1(Psat1)	Rattus norvegicus
P11884	aldehyde dehydrogenase 2 family (mitochondrial)(Aldh2)	Rattus norvegicus
F1M4I4	VPS51 GARP complex subunit(Vps51)	Rattus norvegicus
D3Z981	plexin A1(Plxna1)	Rattus norvegicus
Q9JJ54	heterogeneous nuclear ribonucleoprotein D(Hnrnpd)	Rattus norvegicus
P50398	GDP dissociation inhibitor 1(Gdi1)	Rattus norvegicus
Q5EB77	RAB18, member RAS oncogene family(Rab18)	Rattus norvegicus
P41565	isocitrate dehydrogenase 3 (NAD), gamma(Idh3g)	Rattus norvegicus
Q9Z214	homer scaffolding protein 1(Homer1)	Rattus norvegicus
Q00981	ubiquitin C-terminal hydrolase L1(Uchl1)	Rattus norvegicus
Q5PPJ6	leucyl-tRNA synthetase(Lars)	Rattus norvegicus
Q09073	solute carrier family 25 member 5(Slc25a5)	Rattus norvegicus
F1LRL9	microtubule-associated protein 1B(Map1b)	Rattus norvegicus
Q32PX6	ras homolog family member G(Rhog)	Rattus norvegicus
Q63560	microtubule-associated protein 6(Map6)	Rattus norvegicus
Q7TP27	taste 1 receptor member 2(Tas1r2)	Rattus norvegicus
P10536	RAB1B, member RAS oncogene family(Rab1b)	Rattus norvegicus
B1VKB4	synaptopodin(Synpo)	Rattus norvegicus
P48721	heat shock protein family A member 9(Hspa9)	Rattus norvegicus
O08679	microtubule affinity regulating kinase 2(Mark2)	Rattus norvegicus
F1LW91	nuclear mitotic apparatus protein 1(Numa1)	Rattus norvegicus
P11598	protein disulfide isomerase family A, member 3(Pdia3)	Rattus norvegicus
P68370	tubulin, alpha 1A(Tuba1a)	Rattus norvegicus
O08557	dimethylarginine dimethylaminohydrolase 1(Ddah1)	Rattus norvegicus
P13383	nucleolin(Ncl)	Rattus norvegicus
P00388	cytochrome p450 oxidoreductase(Por)	Rattus norvegicus
P10760	adenosylhomocysteinase(Ahcy)	Rattus norvegicus
P10888	cytochrome c oxidase subunit 4i1(Cox4i1)	Rattus norvegicus
P09527	RAB7A, member RAS oncogene family(Rab7a)	Rattus norvegicus
Q63002	insulin-like growth factor 2 receptor(Igf2r)	Rattus norvegicus
O35274	protein phosphatase 1, regulatory subunit 9B(Ppp1r9b)	Rattus norvegicus
F1LRT9	dynein cytoplasmic 1 heavy chain 1(Dync1h1)	Rattus norvegicus
P38650	dynein cytoplasmic 1 heavy chain 1(Dync1h1)	Rattus norvegicus
F1LRI5	GCN1 eIF2 alpha kinase activator-like 1(Gcn1l1)	Rattus norvegicus
Q5BK63	NADH:ubiquinone oxidoreductase subunit A9(Ndufa9)	Rattus norvegicus
D3ZE15	NADH dehydrogenase [ubiquinone] 1 alpha subcomplex subunit 13-like(LOC100911483)	Rattus norvegicus
Q08163	adenylate cyclase associated protein 1(Cap1)	Rattus norvegicus
D4A0E8	protein arginine methyltransferase 5(Prmt5)	Rattus norvegicus
O35264	platelet-activating factor acetylhydrolase 1b, catalytic subunit 2(Pafah1b2)	Rattus norvegicus
Q5EB62	solute carrier family 25, member 46(Slc25a46)	Rattus norvegicus
O08662	phosphatidylinositol 4-kinase alpha(Pi4ka)	Rattus norvegicus
O89046	coronin 1B(Coro1b)	Rattus norvegicus
Q3B8Q0	microtubule-associated protein, RP/EB family, member 2(Mapre2)	Rattus norvegicus
Q6IMF3	keratin 1(Krt1)	Rattus norvegicus
P52873	pyruvate carboxylase(Pc)	Rattus norvegicus
Q5RKG9	eukaryotic translation initiation factor 4B(Eif4b)	Rattus norvegicus
D3ZKD9	microtubule-associated protein tau(Mapt)	Rattus norvegicus
P31662	solute carrier family 6 member 17(Slc6a17)	Rattus norvegicus
P24942	solute carrier family 1 member 3(Slc1a3)	Rattus norvegicus
D4A435	intercellular adhesion molecule 5(Icam5)	Rattus norvegicus
P31596	solute carrier family 1 member 2(Slc1a2)	Rattus norvegicus
B4F7C7	heme binding protein 1(Hebp1)	Rattus norvegicus
F1MAQ5	microtubule-associated protein 2(Map2)	Rattus norvegicus
B2RYP4	sorting nexin 2(Snx2)	Rattus norvegicus
F1LM42	ankyrin 2(Ank2)	Rattus norvegicus
F1M9N9	ankyrin 2(Ank2)	Rattus norvegicus
Q5U2S7	proteasome 26S subunit, non-ATPase 3(Psmd3)	Rattus norvegicus
Q9Z2F5	C-terminal binding protein 1(Ctbp1)	Rattus norvegicus
P61980	heterogeneous nuclear ribonucleoprotein K(Hnrnpk)	Rattus norvegicus
Q7TP54	family with sequence similarity 65, member B(Fam65b)	Rattus norvegicus
Q5XI34	protein phosphatase 2 scaffold subunit A alpha(Ppp2r1a)	Rattus norvegicus
F1LNF7	isocitrate dehydrogenase 3 (NAD+) alpha(Idh3a)	Rattus norvegicus
O88767	Parkinsonism associated deglycase(Park7)	Rattus norvegicus
Q5BKC3	Parkinsonism associated deglycase(Park7)	Rattus norvegicus
Q63347	proteasome 26S subunit, ATPase 2(Psmc2)	Rattus norvegicus
Q6AXS4	ATPase H+ transporting accessory protein 2(Atp6ap2)	Rattus norvegicus
P63102	tyrosine 3-monooxygenase/tryptophan 5-monooxygenase activation protein, zeta(Ywhaz)	Rattus norvegicus
P68255	tyrosine 3-monooxygenase/tryptophan 5-monooxygenase activation protein, theta(Ywhaq)	Rattus norvegicus
P68511	tyrosine 3-monooxygenase/tryptophan 5-monooxygenase activation protein, eta(Ywhah)	Rattus norvegicus
Q7TQ85	pyruvate dehydrogenase complex, component X(Pdhx)	Rattus norvegicus
Q5HZY0	UBX domain protein 4(Ubxn4)	Rattus norvegicus
D4AEH9	amylo-alpha-1, 6-glucosidase, 4-alpha-glucanotransferase(Agl)	Rattus norvegicus
P02454	collagen type I alpha 1 chain(Col1a1)	Rattus norvegicus
P24368	peptidylprolyl isomerase B(Ppib)	Rattus norvegicus
D3ZRF5	solute carrier family 25 member 22(Slc25a22)	Rattus norvegicus
F1LQ63	tenascin R(Tnr)	Rattus norvegicus
Q63198	contactin 1(Cntn1)	Rattus norvegicus
P07936	growth associated protein 43(Gap43)	Rattus norvegicus
P62193	proteasome 26S subunit, ATPase 1(Psmc1)	Rattus norvegicus
D4AC36	eukaryotic translation initiation factor 3, subunit F(Eif3f)	Rattus norvegicus
P61765	syntaxin binding protein 1(Stxbp1)	Rattus norvegicus
P07722	myelin-associated glycoprotein(Mag)	Rattus norvegicus
Q9Z1B2	glutathione S-transferase, mu 5(Gstm5)	Rattus norvegicus
Q02356	adenosine monophosphate deaminase 2(Ampd2)	Rattus norvegicus
Q63716	peroxiredoxin 1(Prdx1)	Rattus norvegicus
P45479	palmitoyl-protein thioesterase 1(Ppt1)	Rattus norvegicus
P68136	actin, alpha 1, skeletal muscle(Acta1)	Rattus norvegicus
P61589	ras homolog family member A(Rhoa)	Rattus norvegicus
Q07647	solute carrier family 2 (facilitated glucose transporter), member 3(Slc2a3)	Rattus norvegicus
Q62829	p21 (RAC1) activated kinase 3(Pak3)	Rattus norvegicus
O88339	Epsin 1(Epn1)	Rattus norvegicus
D4A5I9	myosin VI(Myo6)	Rattus norvegicus
P35465	p21 (RAC1) activated kinase 1(Pak1)	Rattus norvegicus
P62747	ras homolog family member B(Rhob)	Rattus norvegicus
F1LQT3	Rho-associated coiled-coil containing protein kinase 2(Rock2)	Rattus norvegicus
Q9Z0V6	peroxiredoxin 3(Prdx3)	Rattus norvegicus
B0BN81	ribosomal protein S5(Rps5)	Rattus norvegicus
B2RYQ2	protein phosphatase 2 phosphatase activator(Ptpa)	Rattus norvegicus
P63012	RAB3A, member RAS oncogene family(Rab3a)	Rattus norvegicus
P97710	signal-regulatory protein alpha(Sirpa)	Rattus norvegicus
Q64605	protein tyrosine phosphatase, receptor type, S(Ptprs)	Rattus norvegicus
P80254	D-dopachrome tautomerase(Ddt)	Rattus norvegicus
P35704	peroxiredoxin 2(Prdx2)	Rattus norvegicus
Q3MIE4	vesicle amine transport 1(Vat1)	Rattus norvegicus
P51635	aldo-keto reductase family 1 member A1(Akr1a1)	Rattus norvegicus
P10111	peptidylprolyl isomerase A (cyclophilin A)(Ppia)	Rattus norvegicus
Q6DUV1	protein kinase C, epsilon(Prkce)	Rattus norvegicus
B2GV79	pyridoxal phosphatase(Pdxp)	Rattus norvegicus
P03994	hyaluronan and proteoglycan link protein 1(Hapln1)	Rattus norvegicus
P04785	prolyl 4-hydroxylase subunit beta(P4hb)	Rattus norvegicus
D4A0X3	BTB (POZ) domain containing 8(Btbd8)	Rattus norvegicus
P32551	ubiquinol cytochrome c reductase core protein 2(Uqcrc2)	Rattus norvegicus
P62278	ribosomal protein S13(Rps13)	Rattus norvegicus
Q9QUH6	synaptic Ras GTPase activating protein 1(Syngap1)	Rattus norvegicus
P62963	profilin 1(Pfn1)	Rattus norvegicus
P50878	ribosomal protein L4(Rpl4)	Rattus norvegicus
B0BNK1	RAB5C, member RAS oncogene family(Rab5c)	Rattus norvegicus
P85125	polymerase I and transcript release factor(Ptrf)	Rattus norvegicus
F1LPV0	asparaginyl-tRNA synthetase(Nars)	Rattus norvegicus
Q6IFV3	keratin 15(Krt15)	Rattus norvegicus
F1LUT4	ATPase phospholipid transporting 8A1(Atp8a1)	Rattus norvegicus
P15943	amyloid beta precursor like protein 2(Aplp2)	Rattus norvegicus
D3ZA84	talin 2(Tln2)	Rattus norvegicus
P04182	ornithine aminotransferase(Oat)	Rattus norvegicus
B1WBS1	TBC1 domain family, member 25(Tbc1d25)	Rattus norvegicus
Q63357	myosin ID(Myo1d)	Rattus norvegicus
Q9ERB4	versican(Vcan)	Rattus norvegicus
Q7TPB1	chaperonin containing TCP1 subunit 4(Cct4)	Rattus norvegicus
O35356	G protein subunit gamma 3(Gng3)	Rattus norvegicus
P85834	Tu translation elongation factor, mitochondrial(Tufm)	Rattus norvegicus
Q6MG49	BCL2-associated athanogene 6(Bag6)	Rattus norvegicus
D3ZER6	transportin 2(Tnpo2)	Rattus norvegicus
B5DFC8	eukaryotic translation initiation factor 3, subunit C(Eif3c)	Rattus norvegicus
B5DFC1	VPS35 retromer complex component(Vps35)	Rattus norvegicus
O35303	dynamin 1-like(Dnm1l)	Rattus norvegicus
F1LS86	isoleucyl-tRNA synthetase(Iars)	Rattus norvegicus
P26772	heat shock protein family E member 1(Hspe1)	Rattus norvegicus
B2GV33	monoamine oxidase A(Maoa)	Rattus norvegicus
B1WBS4	VPS26 retromer complex component B(Vps26b)	Rattus norvegicus
D4A8P9	isoleucyl-tRNA synthetase 2, mitochondrial(Iars2)	Rattus norvegicus
Q5M9G3	cell cycle associated protein 1(Caprin1)	Rattus norvegicus
P85969	NSF attachment protein beta(Napb)	Rattus norvegicus
P63142	potassium voltage-gated channel subfamily A member 2(Kcna2)	Rattus norvegicus
P85845	fascin actin-bundling protein 1(Fscn1)	Rattus norvegicus
D4ABT8	heterogeneous nuclear ribonucleoprotein U-like 2(Hnrnpul2)	Rattus norvegicus
P45592	cofilin 1(Cfl1)	Rattus norvegicus
Q63092	CaM kinase-like vesicle-associated(Camkv)	Rattus norvegicus
Q9ESW0	damage-specific DNA binding protein 1(Ddb1)	Rattus norvegicus
Q8CFN2	cell division cycle 42(Cdc42)	Rattus norvegicus
Q7TT49	CDC42 binding protein kinase beta(Cdc42bpb)	Rattus norvegicus
P68182	protein kinase cAMP-activated catalytic subunit beta(Prkacb)	Rattus norvegicus
P47875	cysteine and glycine-rich protein 1(Csrp1)	Rattus norvegicus
F1LX07	solute carrier family 25 member 12(Slc25a12)	Rattus norvegicus
P68035	actin, alpha, cardiac muscle 1(Actc1)	Rattus norvegicus
D4A6L0	G protein-coupled receptor 158(Gpr158)	Rattus norvegicus
D3ZIE1	similar to ribosomal protein S8(RGD1566369)	Rattus norvegicus
Q3KRF2	high density lipoprotein binding protein(Hdlbp)	Rattus norvegicus
P13471	ribosomal protein S14(Rps14)	Rattus norvegicus
B1WC34	protein kinase C substrate 80K-H(Prkcsh)	Rattus norvegicus
Q68FS4	leucine aminopeptidase 3(Lap3)	Rattus norvegicus
D3ZDJ1	olfactory receptor 848(Olr848)	Rattus norvegicus
F1M842	tumor protein p53 binding protein 1(Tp53bp1)	Rattus norvegicus
F1LNP8	nectin cell adhesion molecule 1(Nectin1)	Rattus norvegicus
P49242	ribosomal protein S3a(Rps3a)	Rattus norvegicus
D3ZW55	inosine triphosphatase(Itpa)	Rattus norvegicus
D4A9D6	DExH-box helicase 9(Dhx9)	Rattus norvegicus
P47942	dihydropyrimidinase-like 2(Dpysl2)	Rattus norvegicus
Q62952	dihydropyrimidinase-like 3(Dpysl3)	Rattus norvegicus
Q6Q0N1	CNDP dipeptidase 2 (metallopeptidase M20 family)(Cndp2)	Rattus norvegicus
F1LSY2	neuronal pentraxin receptor(Nptxr)	Rattus norvegicus
P55068	brevican(Bcan)	Rattus norvegicus
Q8CFG7	calcium voltage-gated channel auxiliary subunit alpha2delta 1(Cacna2d1)	Rattus norvegicus
Q9ERS3	calcium voltage-gated channel auxiliary subunit alpha2delta 1(Cacna2d1)	Rattus norvegicus
Q498D4	talin 1(Tln1)	Rattus norvegicus
B1WC26	N-acetylneuraminate synthase(Nans)	Rattus norvegicus
P28037	aldehyde dehydrogenase 1 family, member L1(Aldh1l1)	Rattus norvegicus
B2RYW9	fumarylacetoacetate hydrolase domain containing 2A(Fahd2a)	Rattus norvegicus
P11275	calcium/calmodulin-dependent protein kinase II alpha(Camk2a)	Rattus norvegicus
B0K014	D-tyrosyl-tRNA deacylase 1(Dtd1)	Rattus norvegicus
Q562A6	leucine rich repeat and Ig domain containing 1(Lingo1)	Rattus norvegicus
F1MA36	spectrin, beta, non-erythrocytic 2(Sptbn2)	Rattus norvegicus
F1M787	catenin delta 2(Ctnnd2)	Rattus norvegicus
Q63377	ATPase Na+/K+ transporting subunit beta 3(Atp1b3)	Rattus norvegicus
P69897	tubulin, beta 5 class I(Tubb5)	Rattus norvegicus
D3ZEI4	hepatic and glial cell adhesion molecule(Hepacam)	Rattus norvegicus
Q63151	acyl-CoA synthetase long-chain family member 3(Acsl3)	Rattus norvegicus
B4F7C2	tubulin, beta 4A class IVa(Tubb4a)	Rattus norvegicus
Q6QIX3	solute carrier family 30 member 3(Slc30a3)	Rattus norvegicus
F1M3W5	Dmx-like 2(Dmxl2)	Rattus norvegicus
D3ZML2	BR serine/threonine kinase 2(Brsk2)	Rattus norvegicus
F1M7X3	cadherin 13(Cdh13)	Rattus norvegicus
Q8R491	EH-domain containing 3(Ehd3)	Rattus norvegicus
Q64640	adenosine kinase(Adk)	Rattus norvegicus
Q06647	ATP synthase, H+ transporting, mitochondrial F1 complex, O subunit(Atp5o)	Rattus norvegicus
P67779	prohibitin(Phb)	Rattus norvegicus
P51799	chloride voltage-gated channel 7(Clcn7)	Rattus norvegicus
Q3T1I4	proline-rich coiled-coil 1(Prrc1)	Rattus norvegicus
Q6P136	hypoxia up-regulated 1(Hyou1)	Rattus norvegicus
P38983	ribosomal protein SA(Rpsa)	Rattus norvegicus
Q62861	sodium voltage-gated channel beta subunit 2(Scn2b)	Rattus norvegicus
B2RYG0	coronin 1C(Coro1c)	Rattus norvegicus
Q6IG02	keratin 2(Krt2)	Rattus norvegicus
Q64057	aldehyde dehydrogenase 7 family, member A1(Aldh7a1)	Rattus norvegicus
Q52KK2	thioredoxin-related transmembrane protein 4(Tmx4)	Rattus norvegicus
P97680	Ras and Rab interactor 1(Rin1)	Rattus norvegicus
P22063	contactin 2(Cntn2)	Rattus norvegicus
B2GV74	kinesin light chain 2(Klc2)	Rattus norvegicus
D4A5G8	pyruvate dehydrogenase (lipoamide) alpha 1-like 1(Pdha1l1)	Rattus norvegicus
Q63537	synapsin II(Syn2)	Rattus norvegicus
Q7M0E3	destrin, actin depolymerizing factor(Dstn)	Rattus norvegicus
P84076	hippocalcin(Hpca)	Rattus norvegicus
Q64560	tripeptidyl peptidase 2(Tpp2)	Rattus norvegicus
P60711	actin, beta(Actb)	Rattus norvegicus
P31000	vimentin(Vim)	Rattus norvegicus
B2RYX0	nascent polypeptide-associated complex alpha subunit(Naca)	Rattus norvegicus
P62632	eukaryotic translation elongation factor 1 alpha 2(Eef1a2)	Rattus norvegicus
P28023	dynactin subunit 1(Dctn1)	Rattus norvegicus
Q6P6R2	dihydrolipoamide dehydrogenase(Dld)	Rattus norvegicus
D3ZCV0	actinin alpha 2(Actn2)	Rattus norvegicus
Q6LDS4	superoxide dismutase 1, soluble(Sod1)	Rattus norvegicus
F1LT36	similar to ribosomal protein S10(RGD1564698)	Rattus norvegicus
Q07009	calpain 2(Capn2)	Rattus norvegicus
P07895	superoxide dismutase 2, mitochondrial(Sod2)	Rattus norvegicus
Q64428	hydroxyacyl-CoA dehydrogenase/3-ketoacyl-CoA thiolase/enoyl-CoA hydratase (trifunctional protein), alpha subunit(Hadha)	Rattus norvegicus
B2RYX1	ubiquinol-cytochrome c reductase, complex III subunit X(Uqcr10)	Rattus norvegicus
P50503	suppression of tumorigenicity 13(St13)	Rattus norvegicus
P63081	ATPase H+ transporting V0 subunit C(Atp6v0c)	Rattus norvegicus
B0BN65	family with sequence similarity 49, member A(Fam49a)	Rattus norvegicus
P35565	calnexin(Canx)	Rattus norvegicus
P70483	striatin(Strn)	Rattus norvegicus
P43244	matrin 3(Matr3)	Rattus norvegicus
Q5PQZ9	NADH:ubiquinone oxidoreductase subunit C2(Ndufc2)	Rattus norvegicus
P29101	synaptotagmin 2(Syt2)	Rattus norvegicus
P07825	synaptophysin(Syp)	Rattus norvegicus
F1LMP2	transferrin(Tf)	Rattus norvegicus
P97834	G protein pathway suppressor 1(Gps1)	Rattus norvegicus
P04636	malate dehydrogenase 2(Mdh2)	Rattus norvegicus
Q63081	protein disulfide isomerase family A, member 6(Pdia6)	Rattus norvegicus
A1L108	actin related protein 2/3 complex, subunit 5-like(Arpc5l)	Rattus norvegicus
P62198	proteasome 26S subunit, ATPase 5(Psmc5)	Rattus norvegicus
P11517	beta-globin(LOC689064)	Rattus norvegicus
Q99PD4	actin related protein 2/3 complex, subunit 1A(Arpc1a)	Rattus norvegicus
O08839	bridging integrator 1(Bin1)	Rattus norvegicus
P28480	t-complex 1(Tcp1)	Rattus norvegicus
Q9QYU4	crystallin, mu(Crym)	Rattus norvegicus
P18266	glycogen synthase kinase 3 beta(Gsk3b)	Rattus norvegicus
D3Z9D0	similar to KIAA1549 protein(RGD1306271)	Rattus norvegicus
P97838	DLG associated protein 3(Dlgap3)	Rattus norvegicus
O54975	X-prolyl aminopeptidase 1(Xpnpep1)	Rattus norvegicus
Q6PW34	neuronal cell adhesion molecule(Nrcam)	Rattus norvegicus
D3Z8P5	similar to pyridoxal (pyridoxine, vitamin B6) kinase(RGD1566085)	Rattus norvegicus
P08009	glutathione S-transferase, mu 7(Gstm7)	Rattus norvegicus
F1LYA6	abl-interactor 2(Abi2)	Rattus norvegicus
B2RZD6	NADH:ubiquinone oxidoreductase subunit A4(Ndufa4)	Rattus norvegicus
D3ZES7	plexin A4(Plxna4)	Rattus norvegicus
P36876	protein phosphatase 2, regulatory subunit B, alpha(Ppp2r2a)	Rattus norvegicus
O70511	ankyrin 3(Ank3)	Rattus norvegicus
F1LUM5	tubulin, alpha-like 3(Tubal3)	Rattus norvegicus
Q6AY84	secernin 1(Scrn1)	Rattus norvegicus
Q99PW9	huntingtin interacting protein 1 related(Hip1r)	Rattus norvegicus
P29147	3-hydroxybutyrate dehydrogenase, type 1(Bdh1)	Rattus norvegicus
Q6IRJ7	annexin A7(Anxa7)	Rattus norvegicus
D3ZWL6	adenosylhomocysteinase-like 2(Ahcyl2)	Rattus norvegicus
D4A5J1	kelch repeat and BTB domain containing 11(Kbtbd11)	Rattus norvegicus
Q5U2P5	C2CD2-like(C2cd2l)	Rattus norvegicus
P15865	histone cluster 1, H1d(Hist1h1d)	Rattus norvegicus
P25113	phosphoglycerate mutase 1(Pgam1)	Rattus norvegicus
Q80ZE8	egl-9 family hypoxia-inducible factor 2(Egln2)	Rattus norvegicus
P16617	phosphoglycerate kinase 1(Pgk1)	Rattus norvegicus
P38652	phosphoglucomutase 1(Pgm1)	Rattus norvegicus
P10687	phospholipase C beta 1(Plcb1)	Rattus norvegicus
Q6PDU7	ATP synthase, H+ transporting, mitochondrial Fo complex, subunit G(Atp5l)	Rattus norvegicus
P17105	inositol-trisphosphate 3-kinase A(Itpka)	Rattus norvegicus
D4A5L9	similar to Cytochrome c, somatic(LOC679794)	Rattus norvegicus
Q5BJZ3	nicotinamide nucleotide transhydrogenase(Nnt)	Rattus norvegicus
P04897	G protein subunit alpha i2(Gnai2)	Rattus norvegicus
O88954	membrane palmitoylated protein 3(Mpp3)	Rattus norvegicus
P82471	G protein subunit alpha q(Gnaq)	Rattus norvegicus
P62138	protein phosphatase 1 catalytic subunit alpha(Ppp1ca)	Rattus norvegicus
P54313	G protein subunit beta 2(Gnb2)	Rattus norvegicus
P63331	protein phosphatase 2, catalytic subunit, alpha isozyme(Ppp2ca)	Rattus norvegicus
Q5U2X8	acyl-CoA thioesterase 9(Acot9)	Rattus norvegicus
P20651	protein phosphatase 3 catalytic subunit beta(Ppp3cb)	Rattus norvegicus
P12369	protein kinase cAMP-dependent type 2 regulatory subunit beta(Prkar2b)	Rattus norvegicus
P05696	protein kinase C, alpha(Prkca)	Rattus norvegicus
B2RYT5	cytochrome c oxidase subunit 7A2 like(Cox7a2l)	Rattus norvegicus
P63319	protein kinase C, gamma(Prkcg)	Rattus norvegicus
Q8CF97	valosin containing protein interacting protein 1(Vcpip1)	Rattus norvegicus
B5DFI9	pyruvate dehydrogenase kinase 3(Pdk3)	Rattus norvegicus
P20788	ubiquinol-cytochrome c reductase, Rieske iron-sulfur polypeptide 1(Uqcrfs1)	Rattus norvegicus
Q5HZA6	prolyl endopeptidase-like(Prepl)	Rattus norvegicus
P00762	protease, serine 1(Prss1)	Rattus norvegicus
Q02253	aldehyde dehydrogenase 6 family, member A1(Aldh6a1)	Rattus norvegicus
P97536	cullin-associated and neddylation-dissociated 1(Cand1)	Rattus norvegicus
Q3KRE8	tubulin, beta 2B class IIb(Tubb2b)	Rattus norvegicus
B1WBU9	phosphorylase, glycogen, muscle(Pygm)	Rattus norvegicus
P13803	electron transfer flavoprotein alpha subunit(Etfa)	Rattus norvegicus
F1M471	EPM2A interacting protein 1(Epm2aip1)	Rattus norvegicus
Q63941	RAB3B, member RAS oncogene family(Rab3b)	Rattus norvegicus
Q812E9	glycoprotein m6a(Gpm6a)	Rattus norvegicus
P63322	RAS like proto-oncogene A(Rala)	Rattus norvegicus
Q5XIT1	microtubule-associated protein, RP/EB family, member 3(Mapre3)	Rattus norvegicus
B5DF70	striatin 4(Strn4)	Rattus norvegicus
B2GUZ5	capping actin protein of muscle Z-line alpha subunit 1(Capza1)	Rattus norvegicus
P12839	neurofilament, medium polypeptide(Nefm)	Rattus norvegicus
F1LUV9	neural cell adhesion molecule 1(Ncam1)	Rattus norvegicus
F1LNY3	neural cell adhesion molecule 1(Ncam1)	Rattus norvegicus
F1LRZ7	neurofilament, heavy polypeptide(Nefh)	Rattus norvegicus
B1H239	leucine rich repeat containing 49(Lrrc49)	Rattus norvegicus
P19234	NADH:ubiquinone oxidoreductase core subunit V2(Ndufv2)	Rattus norvegicus
F1LQQ6	plastin 1(Pls1)	Rattus norvegicus
D3ZRX7	protocadherin 10(Pcdh10)	Rattus norvegicus
P61983	tyrosine 3-monooxygenase/tryptophan 5-monooxygenase activation protein, gamma(Ywhag)	Rattus norvegicus
P35213	tyrosine 3-monooxygenase/tryptophan 5-monooxygenase activation protein, beta(Ywhab)	Rattus norvegicus
Q8VHF5	citrate synthase(Cs)	Rattus norvegicus
Q04931	structure specific recognition protein 1(Ssrp1)	Rattus norvegicus
Q6RUV5	ras-related C3 botulinum toxin substrate 1(Rac1)	Rattus norvegicus
D4A1G8	centrosomal protein 170B(Cep170b)	Rattus norvegicus
A1E347	phosphodiesterase 4D(Pde4d)	Rattus norvegicus
O09175	arginyl aminopeptidase(Rnpep)	Rattus norvegicus
D3ZQG6	tripartite motif-containing 2(Trim2)	Rattus norvegicus
P41542	USO1 vesicle transport factor(Uso1)	Rattus norvegicus
P13234	calcium/calmodulin-dependent protein kinase IV(Camk4)	Rattus norvegicus
Q924S5	lon peptidase 1, mitochondrial(Lonp1)	Rattus norvegicus
O55096	dipeptidylpeptidase 3(Dpp3)	Rattus norvegicus
A0JPJ7	Obg-like ATPase 1(Ola1)	Rattus norvegicus
P97546	neuroplastin(Nptn)	Rattus norvegicus
O35889	afadin, adherens junction formation factor(Afdn)	Rattus norvegicus
Q91XV6	FXYD domain-containing ion transport regulator 6(Fxyd6)	Rattus norvegicus
F1LRI7	AP2 associated kinase 1(Aak1)	Rattus norvegicus
P0C1X8	AP2 associated kinase 1(Aak1)	Rattus norvegicus
D3Z955	phosphoglucomutase 2-like 1(Pgm2l1)	Rattus norvegicus
Q8R2H0	ATPase H+ transporting V1 subunit G2(Atp6v1g2)	Rattus norvegicus
B0BMW2	hydroxysteroid (17-beta) dehydrogenase 10(Hsd17b10)	Rattus norvegicus
Q3T1K5	capping actin protein of muscle Z-line alpha subunit 2(Capza2)	Rattus norvegicus
B2GUZ3	methylenetetrahydrofolate dehydrogenase (NADP+ dependent) 1-like(Mthfd1l)	Rattus norvegicus
P63039	heat shock protein family D member 1(Hspd1)	Rattus norvegicus
D3ZHX3	DIRAS family GTPase 2(Diras2)	Rattus norvegicus
D4A2Q3	pleckstrin and Sec7 domain containing 3(Psd3)	Rattus norvegicus
Q66HA6	ADP-ribosylation factor like GTPase 8B(Arl8b)	Rattus norvegicus
D3ZJX5	translocase of inner mitochondrial membrane 50(Timm50)	Rattus norvegicus
Q920L2	succinate dehydrogenase complex flavoprotein subunit A(Sdha)	Rattus norvegicus
F1M5M9	SLIT-ROBO Rho GTPase activating protein 3(Srgap3)	Rattus norvegicus
Q5RJQ4	sirtuin 2(Sirt2)	Rattus norvegicus
F1LNF0	myosin heavy chain 14(Myh14)	Rattus norvegicus
Q5RK08	glioblastoma amplified sequence(Gbas)	Rattus norvegicus
Q9QXQ0	actinin alpha 4(Actn4)	Rattus norvegicus
P37805	transgelin 3(Tagln3)	Rattus norvegicus
P05708	hexokinase 1(Hk1)	Rattus norvegicus
P13086	succinate-CoA ligase, alpha subunit(Suclg1)	Rattus norvegicus
D4ADD3	HECT, C2 and WW domain containing E3 ubiquitin protein ligase 2(Hecw2)	Rattus norvegicus
P27139	carbonic anhydrase 2(Car2)	Rattus norvegicus
P08592	amyloid beta precursor protein(App)	Rattus norvegicus
Q7TMA5	apolipoprotein B(Apob)	Rattus norvegicus
P40329	arginyl-tRNA synthetase(Rars)	Rattus norvegicus
Q6P9T8	tubulin, beta 4B class IVb(Tubb4b)	Rattus norvegicus
O35509	RAB11B, member RAS oncogene family(Rab11b)	Rattus norvegicus
Q4G079	aminoacyl tRNA synthetase complex-interacting multifunctional protein 1(Aimp1)	Rattus norvegicus
Q4KM74	SEC22 homolog B, vesicle trafficking protein(Sec22b)	Rattus norvegicus
D3ZET9	centrosomal protein of 170 kDa-like(LOC100909664)	Rattus norvegicus
P50554	4-aminobutyrate aminotransferase(Abat)	Rattus norvegicus
F1LS42	protein kinase C, beta(Prkcb)	Rattus norvegicus
Q6GMN8	actinin, alpha 1(Actn1)	Rattus norvegicus
D4AB03	family with sequence similarity 120A(Fam120a)	Rattus norvegicus
D3ZF86	ARFGEF family member 3(Arfgef3)	Rattus norvegicus
Q05982	NME/NM23 nucleoside diphosphate kinase 1(Nme1)	Rattus norvegicus
P17764	acetyl-CoA acetyltransferase 1(Acat1)	Rattus norvegicus
B1WC32	ubiquitin-like modifier activating enzyme 2(Uba2)	Rattus norvegicus
O35567	5-aminoimidazole-4-carboxamide ribonucleotide formyltransferase/IMP cyclohydrolase(Atic)	Rattus norvegicus
P60881	synaptosomal-associated protein 25(Snap25)	Rattus norvegicus
Q8K4K5	LLGL1, scribble cell polarity complex component(Llgl1)	Rattus norvegicus
P56574	isocitrate dehydrogenase (NADP(+)) 2, mitochondrial(Idh2)	Rattus norvegicus
Q04462	valyl-tRNA synthetase(Vars)	Rattus norvegicus
D3ZTK5	similar to ribosomal protein L27(RGD1563835)	Rattus norvegicus
Q91ZN1	coronin 1A(Coro1a)	Rattus norvegicus
Q07266	drebrin 1(Dbn1)	Rattus norvegicus
F1M779	clathrin heavy chain(Cltc)	Rattus norvegicus
P08461	dihydrolipoamide S-acetyltransferase(Dlat)	Rattus norvegicus
Q62698	dynein, cytoplasmic 1 light intermediate chain 2(Dync1li2)	Rattus norvegicus
Q5SGE0	leucine-rich pentatricopeptide repeat containing(Lrpprc)	Rattus norvegicus
B2RYJ7	ARP1 actin-related protein 1 homolog B, centractin beta(Actr1b)	Rattus norvegicus
Q6MFX8	gamma-aminobutyric acid type B receptor subunit 1(Gabbr1)	Rattus norvegicus
D3ZSE6	deafness, autosomal recessive 59(Dfnb59)	Rattus norvegicus
P52296	karyopherin subunit beta 1(Kpnb1)	Rattus norvegicus
Q5FVC2	Rho/Rac guanine nucleotide exchange factor 2(Arhgef2)	Rattus norvegicus
P61265	syntaxin 1B(Stx1b)	Rattus norvegicus
B5DFF7	dual specificity phosphatase 3(Dusp3)	Rattus norvegicus
D3ZJ86	solute carrier family 9 member A6(Slc9a6)	Rattus norvegicus
D3ZX42	RAB GTPase activating protein 1(Rabgap1)	Rattus norvegicus
Q63803	GNAS complex locus(Gnas)	Rattus norvegicus
Q4FZT2	protein phosphatase methylesterase 1(Ppme1)	Rattus norvegicus
Q66H61	glutaminyl-tRNA synthetase(Qars)	Rattus norvegicus
Q4FZU2	similar to keratin complex 2, basic, gene 6a(LOC683313)	Rattus norvegicus
D3ZWA5	kinesin-associated protein 3(Kifap3)	Rattus norvegicus
F1M5N4	malic enzyme 3(Me3)	Rattus norvegicus
Q9WU82	catenin beta 1(Ctnnb1)	Rattus norvegicus
P29266	3-hydroxyisobutyrate dehydrogenase(Hibadh)	Rattus norvegicus
P09951	synapsin I(Syn1)	Rattus norvegicus
D4ADS4	microsomal glutathione S-transferase 3(Mgst3)	Rattus norvegicus
Q6AYS7	aminoacylase 1(Acy1)	Rattus norvegicus
D3ZFB6	proline-rich transmembrane protein 2(Prrt2)	Rattus norvegicus
P09606	glutamate-ammonia ligase(Glul)	Rattus norvegicus
F1M8K0	dystroglycan 1(Dag1)	Rattus norvegicus
Q7TP98	interleukin enhancer binding factor 2(Ilf2)	Rattus norvegicus
F1M4A0	tight junction protein 1(Tjp1)	Rattus norvegicus
F1LSH6	hyperpolarization-activated cyclic nucleotide-gated potassium channel 1(Hcn1)	Rattus norvegicus
P60203	proteolipid protein 1(Plp1)	Rattus norvegicus
D4A133	ATPase H+ transporting V1 subunit A(Atp6v1a)	Rattus norvegicus
Q4V7D2	rogdi homolog(Rogdi)	Rattus norvegicus
Q9QX69	LanC like 1(Lancl1)	Rattus norvegicus
P48500	triosephosphate isomerase 1(Tpi1)	Rattus norvegicus
Q4FZY0	EF-hand domain family, member D2(Efhd2)	Rattus norvegicus
Q5U2N3	phosphatidylinositol transfer protein, membrane-associated 1(Pitpnm1)	Rattus norvegicus
Q5XHZ0	TNF receptor-associated protein 1(Trap1)	Rattus norvegicus
Q01986	mitogen activated protein kinase kinase 1(Map2k1)	Rattus norvegicus
D3ZB78	PHD finger protein 24(Phf24)	Rattus norvegicus
Q68FY0	ubiquinol-cytochrome c reductase core protein I(Uqcrc1)	Rattus norvegicus
Q5U2Z3	nucleosome assembly protein 1-like 4(Nap1l4)	Rattus norvegicus
D3ZWX4	NCK interacting protein with SH3 domain(Nckipsd)	Rattus norvegicus
Q641Y2	NADH dehydrogenase (ubiquinone) Fe-S protein 2(Ndufs2)	Rattus norvegicus
D4A781	importin 5(Ipo5)	Rattus norvegicus
F1LYQ8	FERM, ARH/RhoGEF and pleckstrin domain protein 1(Farp1)	Rattus norvegicus
P21913	succinate dehydrogenase complex iron sulfur subunit B(Sdhb)	Rattus norvegicus
Q3ZBA0	tectonin beta-propeller repeat containing 1(Tecpr1)	Rattus norvegicus
Q5FVI4	cell cycle exit and neuronal differentiation 1(Cend1)	Rattus norvegicus
Q6AY09	heterogeneous nuclear ribonucleoprotein H2 (H')(Hnrnph2)	Rattus norvegicus
P01830	Thy-1 cell surface antigen(Thy1)	Rattus norvegicus
A2RUW1	toll interacting protein(Tollip)	Rattus norvegicus
Q66HR2	microtubule-associated protein, RP/EB family, member 1(Mapre1)	Rattus norvegicus
Q5XIH7	prohibitin 2(Phb2)	Rattus norvegicus
F1M386	Rap guanine nucleotide exchange factor 2(Rapgef2)	Rattus norvegicus
Q641Y8	DEAD-box helicase 1(Ddx1)	Rattus norvegicus
Q68FP1	gelsolin(Gsn)	Rattus norvegicus
P62994	growth factor receptor bound protein 2(Grb2)	Rattus norvegicus
Q5XI32	capping actin protein of muscle Z-line beta subunit(Capzb)	Rattus norvegicus
Q9EPR9	phosphodiesterase 1A(Pde1a)	Rattus norvegicus
D4A0T0	NADH:ubiquinone oxidoreductase subunit B10(Ndufb10)	Rattus norvegicus
Q9EPC6	profilin 2(Pfn2)	Rattus norvegicus
D4A383	tweety family member 3(Ttyh3)	Rattus norvegicus
P62762	visinin-like 1(Vsnl1)	Rattus norvegicus
D4ABK1	synaptogyrin 3(Syngr3)	Rattus norvegicus
Q5I0D1	glyoxalase domain containing 4(Glod4)	Rattus norvegicus
