# Supplementary material for: Quantitative proteomic analytic approaches to identify metabolic changes in the medial prefrontal cortex of rats exposed to space radiation
Source: Front Physiol. 2022 Aug 26;13:971282. doi: 10.3389/fphys.2022.971282 (PMC9459391; doi:10.3389/fphys.2022.971282)
Supplement: Supplementary file 3 [file Table3.XLSX]

## Sheet: Supplementary Table 3
Supplementary Table 3: Pathways included in the network in CPA
ID	Database	Pathway Name	Proteins	Sham vs. Irradiated	Sham vs. Irradiated	Sham vs. Functional	Sham vs. Functional	Sham vs. Impaired	Sham vs. Impaired
				GSEA	GSEA-FDR	GSEA	GSEA-FDR	GSEA	GSEA-FDR
path:rno04151	KEGG	PI3K-Akt signaling pathway	357	< 1e-03	< 1e-03	< 1e-03	< 1e-03	< 1e-03	< 1e-03
path:rno04010	KEGG	MAPK signaling pathway	304	< 1e-03	< 1e-03	< 1e-03	< 1e-03	< 1e-03	< 1e-03
path:rno04144	KEGG	Endocytosis	283	< 1e-03	< 1e-03	< 1e-03	< 1e-03	< 1e-03	< 1e-03
path:rno04810	KEGG	Regulation of actin cytoskeleton	230	< 1e-03	< 1e-03	< 1e-03	< 1e-03	< 1e-03	< 1e-03
path:rno04714	KEGG	Thermogenesis	247	< 1e-03	< 1e-03	< 1e-03	< 1e-03	< 1e-03	< 1e-03
path:rno04015	KEGG	Rap1 signaling pathway	219	< 1e-03	< 1e-03	< 1e-03	< 1e-03	< 1e-03	< 1e-03
path:rno04014	KEGG	Ras signaling pathway	243	< 1e-03	< 1e-03	< 1e-03	< 1e-03	< 1e-03	< 1e-03
path:rno05205	KEGG	Proteoglycans in cancer	213	< 1e-03	< 1e-03	< 1e-03	< 1e-03	< 1e-03	< 1e-03
path:rno04510	KEGG	Focal adhesion	207	< 1e-03	< 1e-03	< 1e-03	< 1e-03	< 1e-03	< 1e-03
path:rno03010	KEGG	Ribosome	256	< 1e-03	< 1e-03	< 1e-03	< 1e-03	< 1e-03	< 1e-03
path:rno04360	KEGG	Axon guidance	186	< 1e-03	< 1e-03	< 1e-03	< 1e-03	< 1e-03	< 1e-03
path:rno04024	KEGG	cAMP signaling pathway	218	< 1e-03	< 1e-03	< 1e-03	< 1e-03	< 1e-03	< 1e-03
path:rno04062	KEGG	Chemokine signaling pathway	185	< 1e-03	< 1e-03	< 1e-03	< 1e-03	< 1e-03	< 1e-03
path:rno04145	KEGG	Phagosome	203	< 1e-03	< 1e-03	< 1e-03	< 1e-03	< 1e-03	< 1e-03
path:rno03013	KEGG	RNA transport	177	< 1e-03	< 1e-03	< 1e-03	< 1e-03	< 1e-03	< 1e-03
path:rno00230	KEGG	Purine metabolism	138	< 1e-03	< 1e-03	< 1e-03	< 1e-03	< 1e-03	< 1e-03
path:rno04724	KEGG	Glutamatergic synapse	116	< 1e-03	< 1e-03	< 1e-03	< 1e-03	< 1e-03	< 1e-03
path:rno04722	KEGG	Neurotrophin signaling pathway	127	< 1e-03	< 1e-03	< 1e-03	< 1e-03	< 1e-03	< 1e-03
path:rno04150	KEGG	mTOR signaling pathway	163	< 1e-03	< 1e-03	< 1e-03	< 1e-03	< 1e-03	< 1e-03
path:rno04530	KEGG	Tight junction	175	< 1e-03	< 1e-03	< 1e-03	< 1e-03	< 1e-03	< 1e-03
path:rno04072	KEGG	Phospholipase D signaling pathway	154	< 1e-03	< 1e-03	< 1e-03	< 1e-03	0.02204	0.0483377
path:rno04660	KEGG	T cell receptor signaling pathway	111	< 1e-03	< 1e-03	< 1e-03	< 1e-03	< 1e-03	< 1e-03
path:rno04142	KEGG	Lysosome	137	0.01316	0.0262787	< 1e-03	< 1e-03	0.07005	0.120711
GO:0006508	GO	proteolysis	347	< 1e-03	< 1e-03	< 1e-03	< 1e-03	< 1e-03	< 1e-03
GO:0043066	GO	negative regulation of apoptotic process	396	< 1e-03	< 1e-03	< 1e-03	< 1e-03	< 1e-03	< 1e-03
GO:0007165	GO	signal transduction	303	< 1e-03	< 1e-03	< 1e-03	< 1e-03	< 1e-03	< 1e-03
GO:0042493	GO	response to drug	284	< 1e-03	< 1e-03	< 1e-03	< 1e-03	< 1e-03	< 1e-03
GO:0030154	GO	cell differentiation	259	< 1e-03	< 1e-03	< 1e-03	< 1e-03	< 1e-03	< 1e-03
GO:0007420	GO	brain development	204	< 1e-03	< 1e-03	< 1e-03	< 1e-03	< 1e-03	< 1e-03
GO:0007568	GO	aging	158	< 1e-03	< 1e-03	< 1e-03	< 1e-03	< 1e-03	< 1e-03
GO:0001666	GO	response to hypoxia	155	< 1e-03	< 1e-03	< 1e-03	< 1e-03	< 1e-03	< 1e-03
GO:0006886	GO	intracellular protein transport	172	< 1e-03	< 1e-03	< 1e-03	< 1e-03	< 1e-03	< 1e-03
GO:0015031	GO	protein transport	118	< 1e-03	< 1e-03	< 1e-03	< 1e-03	0.06433	0.130958
