# Supplementary material for: Quantitative proteomic analytic approaches to identify metabolic changes in the medial prefrontal cortex of rats exposed to space radiation
Source: Front Physiol. 2022 Aug 26;13:971282. doi: 10.3389/fphys.2022.971282 (PMC9459391; doi:10.3389/fphys.2022.971282)
Supplement: Supplementary file 9 [file Table1.XLSX]

## Sheet: Sheet1
Supplementary Table 1: Complete list of proteins
	Sham	Sham	Sham	Sham	Sham	15I	15I	15I	15I	15I	15F	15F
Prot ID	5264	A00B	B3C7	C449	55C5	FB02	AF68	B6C4	OB7B	EA6D	0DFC	FBF2
A0JPJ7	2.13753e+07	4.75958e+07	5.35524e+06	4.38533e+07	1.79213e+07	0	0	0	0	0	0	0
A1E347	0	0	0	0	0	0	1.61213e+08	1.61248e+08	6.43105e+08	8.5616e+08	0	0
A1L108	3.22986e+07	3.39318e+08	0	5.1231e+07	8.77621e+06	0	0	0	0	0	8.76729e+06	7.77015e+06
A2RUW1	0	0	8.10794e+07	2.21763e+08	7.76875e+06	5.39894e+06	6.25296e+06	0	1.40399e+08	0	0	0
A2VCW8	388904661	8.93368e+08	0	1.28455e+09	2.57434e+08	0	0	0	0	0	0	0
A8WCF8	4.49102e+07	2.23609e+07	7.12665e+06	0	1.3595e+07	7.84449e+06	5799016	1.49836e+07	2.62298e+07	0	24390780	1.12545e+07
A9CMA6	0	0	2.48173e+06	9.70756e+07	6.24359e+06	0	0	0	0	0	0	0
B0BMW0	5.83759e+08	6.69244e+07	4.81585e+08	9.01135e+08	0	1.44386e+08	0	8.67766e+08	4.85973e+08	1.91592e+08	1.76907e+08	4.66234e+08
B0BMW2	1.45793e+07	4.51312e+07	8.51897e+06	1.80458e+07	2.10856e+07	9.13055e+06	8.41725e+06	1.91482e+07	4.77956e+07	0	2.89197e+07	1.91898e+08
B0BN30	1.88322e+08	1.53025e+07	6.26458e+06	2.23929e+08	6.85573e+07	0	5.9931e+07	7.28395e+07	1.59161e+07	0	0	0
B0BN63	4.12686e+08	5.06602e+08	3.08186e+08	1.33873e+08	1.58735e+08	0	0	0	0	0	0	0
B0BN65	0	0	0	0	0	2.21237e+07	4.98637e+06	0	5.61591e+07	1.32535e+07	7.9033e+06	2.31556e+07
B0BN81	6.67863e+07	3.20357e+07	7.13488e+06	0	1.25906e+07	1.30175e+07	5.62111e+07	6.32139e+07	2.75689e+07	0	0	0
B0BNE6	4.06365e+07	2.14337e+08	1.00231e+07	3.20497e+06	2.22702e+07	1.23753e+07	2.31314e+07	1.35254e+08	2.30721e+07	0	4.81387e+06	1.22516e+07
B0BNF1	2.04008e+08	2.2844e+07	0	2.60821e+08	1.02539e+08	0	0	0	0	0	0	0
B0BNK1	3.09289e+07	5.00981e+08	3.72765e+08	4.21602e+07	6.93539e+07	0	8.31036e+06	9.82293e+07	4.84562e+07	1.13712e+07	0	0
B0K014	1.62622e+07	50891549	2.2892e+08	2.42429e+07	1.33525e+08	1.53266e+07	9.11719e+06	8.41419e+08	1.42472e+08	6.92933e+06	0	0
B0K020	136760707	1.66715e+09	9.79163e+07	1.21342e+09	8.41365e+07	8.89248e+06	1.6847e+07	2.66424e+08	8.03858e+07	0	9.19125e+06	4.55831e+07
B1H239	0	0	0	0	0	2.97568e+08	8.62625e+07	4.4237e+08	0	1.53765e+07	0	0
B1H2A6	0	0	0	0	0	5.4289e+08	0	748959070	8.0704e+07	1.36097e+08	0	0
B1VKB4	0	0	0	0	0	9.77674e+07	0	0	1.85944e+08	0	0	0
B1WBS1	0	0	0	0	0	14411526	0	1.55195e+08	5.28498e+07	0	0	0
B1WBS4	1.609e+08	4.40132e+07	7.61309e+07	0	8.02984e+07	0	0	0	0	0	0	0
B1WBU9	3.21712e+08	1.40225e+09	3.65996e+08	5.71132e+08	2.47481e+08	6.04202e+08	2.24572e+08	1.0667e+09	9.83185e+08	4.53579e+08	1.31075e+08	4.80583e+08
B1WC26	1.73742e+07	1.65591e+08	0	8.35369e+07	1.90898e+08	0	0	0	0	0	0	0
B1WC32	2.31657e+07	3.14428e+08	1.41404e+07	1.00114e+08	8.02727e+06	2.12101e+07	0	3.05279e+08	3.16373e+07	0	2.05097e+07	3.46059e+07
B1WC34	7.66934e+07	7.53785e+06	4.92926e+07	102529824	4.24489e+07	5.39547e+07	2.39849e+07	9.9873e+07	1.20062e+08	3.73331e+07	1.85753e+07	4.21171e+07
B1WC61	1.24137e+10	5.24933e+07	1.48028e+07	0	9.2174e+06	8.42481e+07	1.51518e+07	1.48328e+08	3.57638e+07	6.40668e+07	2.07126e+07	3.67606e+07
B1WC64	3.97473e+08	1.16531e+09	2.40042e+08	0	2.1505e+06	0	0	0	0	0	0	0
B2GUZ3	1.18977e+08	6.1437e+07	1.11414e+08	2.45968e+08	7.61909e+07	1.882e+07	3.41257e+07	1.1904e+08	4.32949e+07	2.24135e+07	1.15009e+08	1.4907e+08
B2GUZ5	7.21944e+07	1.26015e+07	3.83297e+07	8.31587e+08	0	0	0	0	0	0	0	0
B2GUZ9	3.08087e+08	4.00528e+10	7.2849e+07	2.47573e+08	5.53373e+07	1.25371e+08	1.11335e+08	1.44579e+08	2.34632e+07	1.53492e+08	4.75914e+07	6.88393e+07
B2GV03	3.60404e+08	1.09134e+08	3.70825e+08	6.45796e+08	3.07404e+08	2.59644e+08	2.36054e+08	1.22633e+09	1.8399e+09	4.06422e+08	2.06504e+08	7.20653e+08
B2GV33	0	0	8.18332e+07	1.55469e+08	2.48032e+08	5.39532e+07	4.11251e+07	2.44652e+08	7.28443e+07	1.52126e+08	1.98466e+07	3.56915e+07
B2GV54	4.44351e+07	3.50099e+07	2.21395e+07	1.03232e+08	6.5471e+07	0	0	0	0	0	5.20265e+06	4.4132e+07
B2GV73	6.44156e+07	7.74395e+08	0	7.49627e+07	2.42312e+08	2.3487e+08	1.26308e+08	0	6.11335e+08	0	0	0
B2GV74	5.73117e+07	2.4423e+07	8.56145e+07	2.40568e+08	0	0	0	0	0	0	0	0
B2GV79	2.554e+07	2.90127e+07	2.89403e+08	3.35598e+07	6.09282e+07	3.17205e+08	3.45631e+08	1.18144e+08	6.08143e+07	0	1.40667e+07	4.40996e+07
B2GVB4	0	0	0	0	0	0	0	0	0	0	7.16987e+07	5.47053e+07
B2LYI9	0	0	0	0	0	4.86684e+07	0	0	2.33708e+08	1.77189e+08	0	0
B2RYG0	1.8243e+07	9.59565e+07	8.00307e+06	1.77435e+07	1.56943e+08	0	0	0	0	0	0	0
B2RYG2	0	0	0	0	0	0	1.38334e+07	3.55764e+08	2.62489e+08	0	0	0
B2RYG6	3.51271e+07	1.85973e+08	5.1425e+07	8.85303e+07	4.2965e+07	4.82775e+07	2.13893e+07	1.07992e+08	8.5183e+07	0	3.71068e+07	3.53146e+07
B2RYI6	1.80134e+08	1.71003e+08	1.12408e+08	0	1.14738e+07	0	0	0	0	0	0	0
B2RYJ7	6.36951e+07	6.10103e+07	5.87607e+08	3.35704e+08	3.38284e+07	0	0	0	0	0	0	0
B2RYP0	0	0	0	0	0	0	0	0	0	0	4.28164e+07	1.00442e+08
B2RYP4	2.12527e+08	2.53339e+08	3.40192e+07	0	2.87564e+07	1.88889e+07	5.28807e+07	67811141	0	3.86572e+06	0	0
B2RYQ2	3.43569e+08	1.8411e+07	1.31614e+08	2.28031e+09	8.31866e+06	0	2.23038e+08	2.12461e+08	7.02492e+07	9.69818e+08	1.14657e+07	7.169e+07
B2RYS2	5.35378e+07	8.55317e+07	5.83529e+06	2.17516e+07	1.27731e+07	6.59446e+07	0	6.04728e+07	6.29306e+07	0	0	0
B2RYS8	9.18307e+07	7.94482e+07	5.76871e+07	3.02346e+07	3.98631e+07	2.13033e+08	3.52897e+08	0	8.9742e+07	0	3.86089e+07	7.38355e+07
B2RYT5	0	0	2.51742e+07	3.01248e+07	4.31591e+07	0	3.36651e+06	1.77301e+07	4.48424e+07	0	0	0
B2RYW3	3.76513e+07	3.61792e+07	3.21888e+07	0	2.44167e+07	0	0	0	0	0	4.23086e+06	1.39936e+07
B2RYW9	2.1676e+07	5.69023e+06	1.57731e+07	1.577e+07	0	9.20613e+06	0	7.0466e+08	9.0612e+07	0	0	0
B2RYX0	0	0	0	0	0	0	3.01835e+06	1.73543e+07	22590863	0	0	0
B2RYX1	7.27615e+07	1.41382e+09	153783417	6.98059e+07	6.84734e+07	3.86211e+07	7.55615e+06	1.80983e+08	3.66824e+07	0	0	0
B2RZ08	0	0	0	0	0	0	2.99265e+07	1.11513e+08	5.71452e+07	0	0	0
B2RZ72	1.41099e+08	6.7076e+07	3.82665e+07	7.78044e+07	4.13702e+07	5.45138e+07	9.463e+06	4.48592e+07	6.17355e+07	8.65869e+06	3.85572e+07	5.40975e+07
B2RZD6	1.22809e+08	8.06171e+07	5.36047e+08	3.57832e+08	5.88596e+08	9.8486e+07	1.2657e+08	4.6961e+08	2.98014e+08	33910579	0	0
B3GNI6	2.79989e+09	6.88407e+07	1.0082e+09	3.54215e+08	0	0	4.0689e+08	8.23357e+09	2.8017e+08	0	1284359246	1.19824e+09
B4F772	1.24421e+08	5.6448e+08	1.14851e+08	1.72004e+08	5.50602e+07	7.19568e+07	8.50223e+07	875335017	2.67417e+08	2.48853e+08	5.88827e+07	1.02937e+08
B4F7C2	9.34082e+09	3.8244e+09	7.95806e+09	8.69541e+09	5.06363e+09	4.15355e+09	4.11642e+09	1.76806e+10	7.82898e+09	2.09778e+09	3.91372e+09	5.84636e+09
B4F7C7	9.08142e+08	1.69102e+07	9.03865e+06	0	2.23777e+07	1.382e+06	3.48002e+06	1.74567e+07	0	0	0	0
B5DF41	0	0	0	0	0	0	4.81581e+07	6.05588e+07	3.21585e+08	0	0	0
B5DF65	8.17218e+07	9.16055e+07	6.58263e+06	6.21367e+07	2.76435e+08	0	9.15474e+06	4.70982e+07	1.08991e+08	0	2.6374e+07	2.41493e+07
B5DF70	0	0	0	0	0	0	1.08669e+07	0	4.68169e+07	1.04502e+07	0	0
B5DF89	1.87257e+08	1.04373e+08	3.25146e+07	0	1.99727e+08	1.71841e+08	1.0852e+08	6.35082e+08	1.35412e+08	5.44021e+07	0	0
B5DFC1	1.43067e+08	4.90728e+07	1.09828e+08	1.88623e+08	5.94489e+07	5.50515e+07	9.66871e+07	5.5099e+08	1.93758e+08	6.68648e+07	8.25195e+07	1.03412e+08
B5DFC8	0	0	0	0	0	0	0	3.15587e+09	6.4518e+08	1.07648e+08	0	0
B5DFF7	0	0	0	0	0	0	0	0	0	0	6.52845e+06	1.84346e+07
B5DFG2	0	0	0	0	0	1.63165e+08	1.37678e+08	0	0	3.94836e+08	0	0
B5DFG5	0	0	0	0	0	0	4.05041e+08	2.84113e+09	3.46035e+08	0	0	0
B5DFI9	9.04067e+08	7.80823e+06	5.09356e+08	1.65625e+08	5.27505e+07	0	0	0	0	0	7.03602e+06	1.68247e+08
B5DFK6	7.4299e+08	3.14659e+08	6.36441e+08	4.36124e+08	3.09742e+08	2.54797e+08	1.48519e+08	1.24075e+08	5.24593e+08	3.92591e+08	0	0
B6DTP5	2.62041e+08	6.04438e+07	3.47516e+07	1.64984e+08	2.53055e+07	2.253e+07	0	3.31593e+08	1.77385e+08	0	5.87459e+06	5.53009e+07
C9WPN3	0	0	0	0	0	0	0	0	0	0	4.0792e+07	1.19561e+09
D3KR63	0	0	0	0	0	0	1.22579e+08	5.81052e+07	1.06399e+08	0	0	0
D3Z8P5	0	0	0	0	0	1.02166e+08	1.18979e+07	1.00581e+08	1.13021e+08	0	2.00015e+07	3.68681e+07
D3Z8P5	0	0	0	0	0	1.02166e+08	1.18979e+07	1.00581e+08	1.13021e+08	0	2.00015e+07	3.68681e+07
D3Z941	0	0	0	0	0	0	0	4.68321e+07	3.21624e+07	1.90469e+07	0	0
D3Z955	2.06669e+08	1.91077e+07	55987425	1.04514e+08	2.19016e+08	5.93352e+07	4.89341e+07	2.79039e+08	1.20991e+08	273953597	8.23208e+07	1.6546e+08
D3Z981	0	0	0	0	0	0	9.17148e+07	2.84453e+08	2.45639e+08	2.0411e+08	1.67071e+08	2.15128e+08
D3Z9D0	0	0	0	0	0	6.79773e+07	9.43661e+07	235973061	0	2.82181e+07	3.32442e+07	2.59871e+07
D3Z9D0	0	0	0	0	0	6.79773e+07	9.43661e+07	235973061	0	2.82181e+07	3.32442e+07	2.59871e+07
D3Z9H2	4.89521e+09	3.3684e+07	5.11713e+07	0	7.61246e+07	0	0	0	0	0	0	0
D3ZA84	0	0	0	0	0	1.0991e+08	0	8.64151e+08	1.37484e+09	0	0	0
D3ZAA9	3.91746e+07	4.20834e+07	1.50414e+08	9.19626e+08	0	1.43028e+07	4.00771e+07	3.75268e+08	7.24637e+07	0	1.73676e+08	1.78679e+07
D3ZAF6	1.43772e+08	2.25939e+08	6.17574e+07	1.75533e+08	6.99826e+07	8.16009e+07	7.00764e+07	0	1.78355e+08	4.35829e+07	4.36517e+07	2.63485e+08
D3ZAP9	3.1138e+08	2.32489e+08	0	3.92379e+07	7.13814e+07	0	0	0	0	0	0	0
D3ZAY7	1.94668e+09	3.49623e+08	6.08535e+08	0	3.68689e+07	0	4.06591e+08	4.19526e+08	4.77535e+08	2.68873e+08	0	0
D3ZB78	0	0	0	0	0	7.28241e+07	8.82906e+07	0	0	8.10544e+07	0	0
D3ZBH0	4.16656e+07	6.26331e+07	1.5581e+06	1.77488e+08	1.59546e+07	4.32114e+07	0	2.05283e+08	3.15482e+07	7.18241e+07	0	0
D3ZBU7	0	0	0	0	0	1.72771e+07	1.44244e+07	6.63859e+07	6.65697e+07	2.47848e+07	4.93224e+07	3.51485e+07
D3ZC55	3.03893e+08	4.1817e+07	1.97833e+08	4.83748e+08	1.56302e+08	3.03772e+08	1.80549e+08	1.04854e+09	5.67507e+08	2.01342e+08	1.23965e+08	4.10636e+08
D3ZC84	0	0	0	0	0	2.98464e+08	9.31544e+07	7.46147e+08	8.51751e+08	1.74043e+08	1.18931e+08	1.55634e+08
D3ZCV0	5.79856e+08	2.67425e+07	1.50458e+08	4.88274e+08	5.47828e+08	5.98977e+08	1.42795e+08	5.84611e+08	4.44916e+08	2.37972e+08	0	0
D3ZDH8	6.40307e+08	2.19663e+08	1.74907e+08	1.55886e+08	1.21587e+08	1.03148e+08	4.27824e+07	3.07108e+08	2.29381e+08	9.37492e+06	1.29365e+08	1.56999e+08
D3ZDJ1	0	0	0	0	0	1.05695e+08	78035686	3.35455e+08	0	0	0	0
D3ZDU2	0	0	0	0	0	7.74984e+07	5.55196e+08	0	0	3.04342e+07	0	0
D3ZE15	7.86944e+07	3.47162e+07	3.5671e+07	5.84535e+07	3.13367e+07	0	1.63386e+07	7.20666e+07	1.01648e+08	2175180	0	0
D3ZE17	9.71359e+07	1.50758e+07	1.04431e+08	0	4.67083e+07	1.96315e+08	1.78608e+08	9.2066e+08	3.93492e+08	1.34385e+08	4.18715e+07	1.50257e+08
D3ZEI4	7.60424e+07	2.6606e+08	2.13575e+09	1.0378e+08	1.61049e+08	1.19863e+08	7.56767e+07	5.36796e+08	9.58573e+07	8.54995e+07	8.28592e+07	1.61013e+08
D3ZER6	0	0	0	0	0	0	8.26014e+06	3.90496e+07	2.80105e+07	0	0	0
D3ZES7	1.24976e+08	4.8641e+08	7.50724e+07	1.60026e+08	0	1.02802e+08	6.18141e+08	1.19576e+09	1.13947e+08	0	1.77792e+07	1.16162e+09
D3ZET9	0	0	2.91306e+08	8.75364e+10	3.73845e+09	0	0	7.17104e+10	1.29801e+09	4.50038e+08	0	0
D3ZF26	0	0	0	0	0	0	0	5.14043e+08	4.45043e+08	2.29493e+08	0	0
D3ZF86	0	0	0	0	0	3.51163e+08	7.97223e+08	260189328	5.93965e+08	1.87109e+08	0	0
D3ZFB6	1.15691e+08	9.27574e+07	7.03297e+07	3.83134e+07	4.4849e+07	2.21427e+08	5.22465e+07	1.71559e+08	7.04098e+07	1.62717e+07	4.82467e+07	3.7778e+07
D3ZFP6	0	0	0	0	0	0	3.12454e+07	2.34356e+08	2.9914e+08	9.55286e+08	0	0
D3ZFQ8	2.28093e+08	4.33282e+07	1.53468e+08	2.11645e+08	1.41378e+08	9.70134e+07	7.51303e+07	4.74458e+08	2.79837e+08	7.38903e+07	4.83802e+07	1.54495e+08
D3ZG43	1.36045e+08	0	1.92958e+08	7.21626e+07	6.14514e+07	4.61621e+07	4.57049e+07	2.31461e+08	1.79873e+08	1.80095e+08	5.42673e+07	8.69836e+07
D3ZGE6	2.02724e+08	2.85571e+07	1.07361e+08	1.84692e+08	0	0	1.40201e+08	0	3.84148e+08	4.5704e+07	0	0
D3ZGN2	5.42736e+08	1.14594e+07	2.30575e+07	0	83036782	4.39639e+07	0	7.6661e+07	3.0901e+08	0	0	0
D3ZHX3	5.26576e+07	1.20697e+07	8.71486e+06	1.91745e+07	4.18881e+07	0	4.05255e+06	0	2.23632e+07	8008891	6.04438e+07	1.88288e+07
D3ZIE1	0	0	0	0	0	8.90542e+06	0	4.0625e+07	2.14043e+07	0	0	0
D3ZIP8	0	0	0	0	0	0	1.17805e+06	4.84568e+07	2.42806e+07	0	0	0
D3ZJ86	0	0	0	0	0	2.252e+07	1.51122e+07	0	1.80634e+07	0	0	0
D3ZJH9	0	0	1.853e+08	1.52339e+08	8.19491e+07	0	0	0	0	0	0	0
D3ZJX5	1.57755e+07	9.73125e+06	4.0134e+07	0	10310322	0	0	0	0	0	0	0
D3ZKD9	3.4342e+08	2.3831e+07	0	2.89247e+08	1.68889e+08	1.83271e+08	3.47646e+07	8.52023e+08	5.7708e+08	0	1.21554e+08	4.33486e+08
D3ZKK5	49213637	1.62578e+08	2.38834e+06	0	9.3617e+06	2.39387e+07	1.85975e+07	1.97454e+08	0	0	0	0
D3ZKX8	8.78087e+08	1.17425e+08	1.14912e+07	0	1.89937e+07	0	0	0	0	0	0	0
D3ZL30	0	0	0	0	0	0	0	0	0	0	8.02867e+07	1.12468e+07
D3ZLC1	5.48721e+08	2.79736e+08	4.49028e+07	8.91176e+07	1.06086e+08	0	0	0	0	0	2.86375e+07	8.11169e+07
D3ZLT1	0	0	0	0	0	1.35418e+08	0	1.20007e+07	5.59294e+07	0	3.18002e+07	1.05736e+07
D3ZML2	6.22277e+08	9.40484e+07	1.17561e+08	482047336	2.93295e+07	0	0	0	0	0	0	0
D3ZNG0	0	0	0	0	0	9.38602e+07	5.00369e+07	0	1.29367e+08	0	0	0
D3ZPR0	0	0	0	0	0	0	0	1.43504e+08	2.20123e+07	3.01187e+07	0	0
D3ZQD3	3.19198e+08	2.00363e+07	3.83902e+08	236986822	4.33605e+08	1.64828e+08	3.256e+08	3.13971e+09	2.93348e+08	7.04052e+07	5.06602e+08	4.2764e+08
D3ZQG6	8.95206e+07	2.66017e+08	6.10722e+07	4.31078e+07	4.53926e+07	7.76259e+08	3.8599e+07	2.5852e+09	2.14825e+08	1.2659e+07	0	0
D3ZQL7	4.51738e+08	3.56086e+07	2.80885e+08	3.37519e+08	1.90774e+08	4.33024e+07	7.54265e+07	5.40502e+08	2.76575e+08	9.21676e+07	9.27824e+07	2.77293e+08
D3ZRF5	1.00245e+08	8.5027e+07	8.27213e+07	8.66061e+07	8.11223e+07	6.83671e+07	2.01526e+07	1.99968e+08	1.97028e+08	0	1.44433e+07	4.4431e+07
D3ZRN3	0	0	0	0	0	4.26971e+09	2.88181e+09	9.2191e+09	0	0	0	0
D3ZRX7	0	0	0	0	0	0	2.03747e+07	1.29882e+08	8.37954e+06	0	0	0
D3ZSE6	2.58501e+08	2096531278	1.63185e+08	1.00048e+09	5.16416e+07	0	0	0	0	0	0	0
D3ZT20	1.27619e+07	5.50127e+07	2.11892e+07	1.86737e+08	7.5697e+08	4.53773e+07	3.08625e+07	5.34726e+07	1.60516e+08	1.51004e+07	2.36874e+07	6.44943e+07
D3ZT36	0	0	0	0	0	0	0	0	0	0	4.14299e+07	30807927
D3ZTK5	0	0	0	0	0	0	0	0	0	0	9.53708e+06	1.86575e+08
D3ZTN0	0	0	0	0	0	0	0	0	0	0	2.16567e+08	5.3732e+09
D3ZU74	1.12124e+08	2.49899e+07	1.48009e+08	9.26536e+07	0	7.38935e+07	1.61453e+08	1.33072e+08	3.38739e+08	6.45263e+08	3.14382e+07	6.13064e+07
D3ZUE2	0	0	0	0	0	3.45399e+08	0	0	50729577	3.29258e+07	0	0
D3ZUX5	0	0	1.74099e+07	2.26364e+07	2.0954e+06	1.05688e+07	8.75731e+07	1.70874e+09	1.29654e+08	0	0	0
D3ZVQ0	1.50694e+09	1.08159e+08	4.50684e+08	1.69962e+08	7.88232e+07	1.26968e+08	125267074	3.32349e+08	2.52464e+08	9.67348e+07	1.64917e+08	1.44589e+08
D3ZW08	7.95079e+07	1.78026e+07	8.57429e+07	2.99152e+07	1.38125e+07	0	0	0	0	0	0	0
D3ZW55	4.18731e+07	191063661	20367365	1.09905e+08	1.22108e+08	0	0	0	0	0	0	0
D3ZW56	0	0	0	0	0	0	2.45179e+08	1.48106e+09	8.14521e+08	0	0	0
D3ZWA5	0	0	0	0	0	0	0	3.71571e+08	1.81837e+08	8.74171e+07	0	0
D3ZWA8	2.92947e+07	5.13258e+07	5.98712e+07	1.31929e+08	1.36214e+07	1.71049e+07	7.01921e+07	1.57148e+08	1.02833e+08	1.18439e+08	1.88081e+07	5.36666e+07
D3ZWG2	0	0	6.90351e+07	1.09722e+08	1.23563e+07	0	0	0	0	0	0	0
D3ZWL6	9.22373e+07	1.03217e+08	0	8.859e+08	3.2429e+07	0	0	0	0	0	0	0
D3ZWQ0	9.6145e+06	5.58128e+07	3.04701e+07	8.13632e+07	4.86696e+06	3.18549e+07	3.75946e+08	3.76187e+08	1.88309e+08	0	0	0
D3ZWX4	2.62918e+10	8.86076e+06	1.69141e+10	1.63125e+08	2.28426e+10	1.04445e+09	5.2247e+06	9.78043e+09	3.43837e+09	4.41786e+10	0	0
D3ZX42	3.44217e+08	2.97483e+08	0	5.88107e+08	2.0368e+08	0	1.40698e+08	2.87918e+08	1.41909e+08	0	0	0
D3ZXF8	0	0	0	0	0	1.90673e+08	3.91776e+07	29208251	0	0	0	0
D3ZY46	0	0	0	0	0	2.11656e+08	3.90885e+07	2.31713e+09	1.6046e+07	0	3.01218e+08	2.26756e+07
D3ZYN2	0	0	0	0	0	1.09944e+08	0	1.12996e+08	6.36816e+08	0	0	0
D3ZZ54	2.72882e+08	6.0384e+08	0	8.60519e+07	1.82132e+08	0	0	0	0	0	0	0
D3ZZ99	0	0	0	0	0	1.85111e+08	0	6.74504e+08	3.91299e+08	0	0	0
D3ZZM8	0	0	1.03775e+08	1.09131e+07	4.56145e+07	2.58369e+08	0	1713563724	3.12387e+09	9.23751e+07	0	0
D4A054	0	0	0	0	0	6.33977e+08	0	5.15674e+08	3.26979e+08	0	0	0
D4A0A1	5.25707e+08	4.18115e+08	2.3047e+08	3.96771e+09	2.54221e+08	2.75254e+08	6.16582e+08	7.94143e+08	985745876	0	2.02275e+08	1.12111e+09
D4A0E8	0	0	0	0	0	4.54775e+07	1.50212e+07	4.86678e+08	7.83753e+07	4.68431e+06	0	0
D4A0T0	9.49858e+07	4.68121e+07	1.21582e+08	1.62107e+08	5.1383e+07	2.64409e+07	2.54287e+07	9.61297e+07	2.70439e+08	0	1.69102e+07	5.94044e+07
D4A0X3	1.72662e+08	2.08546e+08	1.14462e+08	0	1.07287e+08	8.90112e+07	0	1.31376e+09	4.87685e+07	4.48097e+08	7.73506e+07	2.78345e+07
D4A133	9.45922e+08	1.66913e+08	8.27938e+08	1.41277e+09	7.24598e+08	5.42562e+08	4.69812e+08	1.48896e+09	1.07994e+09	3.44234e+08	6.60094e+08	6.99013e+08
D4A144	0	0	0	0	0	2.39115e+08	7.46181e+07	0	7.19243e+07	0	0	0
D4A1G8	4.2957e+09	3.91062e+08	1.31158e+09	5.28925e+08	4.04642e+08	1.05165e+08	2.31643e+08	9.997e+08	2.95181e+08	5.48864e+07	2.12339e+08	3.84407e+08
D4A2Q3	0	0	0	0	0	0	2.4757e+07	2.62822e+08	0	2.37431e+08	0	0
D4A383	6.79758e+07	6.6424e+06	1.1544e+07	1.60412e+07	9.15955e+06	0	0	0	0	0	0	0
D4A3S6	0	0	0	0	0	3.20728e+08	0	1.68431e+08	6.90418e+08	0	0	0
D4A435	4.77481e+09	2.48018e+09	9.79348e+07	1.0819e+08	6.00159e+08	7.60503e+07	7.86012e+07	1.41986e+09	1.06807e+09	6.81302e+07	4.90159e+07	2.30216e+08
D4A4F9	122969029	1.73019e+08	2.59559e+07	1.14907e+08	7.13462e+07	3.38997e+07	2.59449e+07	1.602e+08	1.20895e+08	2.93586e+06	8.09829e+06	8.73625e+07
D4A565	4.96497e+07	0	2.4962e+07	7.69546e+07	0	0	3.33873e+06	7.18291e+07	4.34798e+07	1.31454e+08	0	0
D4A5G8	3.12565e+08	3.93689e+08	2.39523e+08	0	1.89379e+08	1.5544e+08	9.39534e+07	0	1.18763e+09	4.78095e+08	0	0
D4A5I9	1.512e+08	1.35822e+08	784698347	1.05199e+09	5.54972e+07	5.08481e+07	9.64409e+06	6.13011e+08	7.5637e+07	9.72966e+07	0	0
D4A5J1	1.08294e+08	3.51238e+07	1.25693e+07	1.08525e+08	0	0	0	0	0	0	0	0
D4A5L9	2.19974e+08	1.99927e+08	1.26084e+08	1.5832e+08	1.17369e+08	7.46857e+07	0	3.63338e+08	2.05615e+08	3.83318e+07	9.81286e+07	1.90456e+08
D4A5X7	0	0	0	0	0	1.9368e+07	3.03756e+07	7.8601e+07	2.40241e+07	0	1.45396e+08	1.90097e+08
D4A6H8	0	0	0	0	0	8.97298e+06	1.13519e+07	8.9002e+07	7.19777e+07	0	0	0
D4A6L0	1.04484e+08	2.96107e+07	2371243358	2.39425e+09	3.21155e+08	0	6.45353e+07	2.36409e+09	2.82978e+08	6.7035e+08	0	0
D4A6P1	0	0	0	0	0	0	0	0	0	0	1.8411e+07	75910795
D4A772	0	0	2.57973e+07	5.60893e+08	3.89101e+08	0	0	0	0	0	0	0
D4A781	1.81444e+07	7.4279e+07	6.80169e+07	0	1.45284e+08	0	1.47221e+08	494793680	3.87844e+07	4.6307e+08	2.54015e+07	4.34691e+07
D4A7R0	0	0	0	0	0	0	0	8.62291e+07	384373489	2.14552e+07	0	0
D4A8C3	8.97262e+08	1.44422e+09	3.64174e+08	6.36046e+08	4.32643e+08	4.61136e+06	248197793	9.0599e+06	5.65243e+08	0	9.36495e+08	5.0761e+08
D4A8P9	5.94075e+08	3.36014e+07	3.10354e+07	2.13634e+09	9.20345e+07	0	2.87748e+07	2.7928e+08	1.90607e+08	4.46587e+07	1.72617e+08	3.79038e+07
D4A9D6	0	0	0	0	0	1.15893e+08	2.65874e+08	0	6.27846e+08	7.731e+07	0	0
D4A9D8	4.94474e+08	3.20672e+07	3.26129e+07	2.08896e+08	0	0	0	3.06179e+08	4.23848e+08	1.27152e+08	0	0
D4AA63	2.73476e+07	54656667	1.11709e+08	5.94962e+08	1.25301e+07	1.65606e+08	3.39875e+07	4.93376e+08	3.98333e+07	1.12324e+08	0	0
D4AAR7	0	0	0	0	0	0	9.56205e+07	1.63345e+09	2.90839e+08	0	0	0
D4AB03	4.84894e+07	1.79279e+07	2.38909e+07	4.67288e+08	0	1.79315e+08	6.81197e+07	0	3.33297e+07	7.09983e+07	0	0
D4AB17	0	0	1.35793e+08	1.61946e+07	1.67509e+07	0	0	0	0	0	0	0
D4ABD7	0	0	0	0	0	5.0629e+08	1.18482e+08	1.78988e+09	0	2.06379e+08	0	0
D4ABK1	1.52932e+08	1.99685e+08	1.27729e+08	6.36108e+07	1.64662e+08	5.74837e+07	2.0652e+08	7.5528e+07	7.12516e+08	3.05572e+07	5.12272e+07	9.45846e+07
D4ABN3	0	0	1.30445e+08	2.74286e+08	1.66404e+08	2.02929e+08	1.10909e+09	511999035	8.29016e+08	5.5674e+08	3.90396e+08	2.13453e+08
D4ABR6	2.21233e+10	1.60476e+08	6.50538e+07	1.04932e+08	8.23521e+07	3.78706e+08	7.57779e+07	1.46716e+08	5.26875e+08	4.25111e+08	4.6558e+07	3.82835e+08
D4ABT8	0	0	0	0	0	0	2.49142e+08	1.15858e+08	3.05874e+08	8.46979e+07	0	0
D4AC23	1.25159e+08	1.54535e+07	1.65046e+08	5.62818e+07	7.27073e+07	8.6841e+07	6.00182e+07	1.2602e+08	9.30891e+07	0	3.37247e+07	5.28714e+07
D4AC36	1.18186e+07	5.84394e+07	5.51731e+06	1.47371e+07	3.97938e+06	0	0	0	0	0	0	0
D4ACB8	2.24261e+08	4.94328e+07	7.17227e+07	3.11203e+08	5.18334e+07	1.95982e+08	1.86641e+08	1.30777e+08	1.47866e+08	0	3.59691e+07	2.02155e+08
D4ACG7	4.29961e+07	4.71872e+07	1.73212e+08	5.35725e+07	2.15499e+07	6.58772e+07	0	1.13082e+09	4.8251e+08	0	6.05652e+07	1.24191e+08
D4ACY5	0	0	0	0	0	0	0	0	0	0	2.4274e+08	2.63852e+08
D4AD05	0	0	0	0	0	0	0	0	0	0	6.94504e+08	2.09776e+08
D4AD15	0	0	0	0	0	2.25753e+08	1.0704e+08	2.43657e+09	1.52408e+09	3.51737e+08	0	0
D4ADD3	0	0	0	0	0	5.08479e+07	0	1.39143e+08	0	3.97798e+08	0	0
D4ADE8	0	0	0	0	0	0	0	0	0	0	1.208e+08	8.00856e+07
D4ADS4	0	0	0	0	0	0	6.24177e+07	0	1.36882e+08	7.7701e+07	0	0
D4AE00	1.54408e+08	1.68292e+08	9.46594e+07	4.04512e+08	2.44373e+08	4.90788e+08	3.06149e+07	1.81435e+08	9.60909e+08	1.13974e+08	4.34413e+07	177929916
D4AE96	2.91099e+07	1.33088e+07	4.15911e+07	3.72815e+06	0	1.78173e+08	0	1.5807e+07	2.09402e+08	3.60446e+07	0	0
D4AEH9	0	0	0	0	0	1.93529e+08	2.61153e+07	1.16843e+08	6.78876e+07	4.71644e+08	0	0
E2RUH2	1.13621e+09	1.5803e+09	0	2.07779e+08	3.74599e+09	0	0	0	0	0	0	0
E9PSJ4	0	0	0	0	0	1.86976e+08	0	8.26084e+08	2.6981e+08	4.07973e+08	0	0
E9PSV5	0	0	6.06674e+07	2.17517e+07	5.32323e+07	0	0	0	0	0	0	0
E9PT29	0	0	0	0	0	0	2.8259e+07	1.04672e+08	3.19417e+07	0	1.20697e+07	5.98466e+07
E9PT53	0	0	0	0	0	1.95884e+07	3.14934e+07	0	0	2.24689e+08	8.5027e+07	1.24444e+07
E9PTX9	2.21206e+08	6.63865e+08	1.38394e+08	0	5.07945e+08	8.06016e+08	4.49683e+07	6.90117e+08	6.67077e+08	2.29897e+07	2.35139e+08	4.11628e+08
F1LM42	4.27124e+08	5.87273e+08	2.18135e+08	0	2.53339e+08	0	0	0	0	0	0	0
F1LM47	4.69255e+09	2.03593e+07	2.91435e+08	1.25972e+09	1.40839e+08	1.96989e+08	1.9807e+08	0	1.39543e+08	0	0	0
F1LM55	0	0	0	0	0	0	0	0	0	0	1.98682e+07	8.89842e+07
F1LM82	0	0	0	0	0	1.14762e+08	3.73209e+07	2.35827e+08	2.31702e+08	0	0	0
F1LMP2	4.26985e+09	659167951	9.8315e+07	4.38287e+08	6.54085e+07	0	1.29428e+08	4.54843e+08	1.30531e+08	0	0	0
F1LMW7	0	0	2.72642e+08	1.27026e+08	1.17793e+08	112085746	3.67786e+07	2.29415e+08	5.21674e+08	0	0	0
F1LMZ8	4.23476e+08	1.51174e+08	3.75685e+08	2.44025e+08	2.35491e+07	0	0	0	0	0	0	0
F1LN92	2.91234e+08	1.0306e+08	5.28361e+07	6.95551e+08	1.28114e+07	0	0	0	0	0	0	0
F1LNE4	0	0	0	0	0	0	4.72126e+07	0	498621940	9.11187e+07	0	0
F1LNF0	0	0	0	0	0	0	1.08822e+08	0	1.23649e+09	5.94974e+08	0	0
F1LNF7	3.76193e+08	5.21228e+07	2.65438e+08	3.88893e+08	2.47347e+08	1.32679e+08	8.77304e+07	5.82835e+08	3.26098e+08	0	1.29967e+08	1.96979e+08
F1LNP4	628788465	3.00082e+08	7.2177e+08	5.57779e+08	8.51375e+07	2.06731e+08	2.22657e+08	3.24375e+09	1024540565	0	1.4712e+08	2.36895e+08
F1LNP8	0	0	0	0	0	4.25083e+08	0	2.18841e+08	497999415	0	0	0
F1LNY3	7.88694e+08	3.73763e+08	6.04631e+08	1.06819e+09	4.09337e+08	7.58432e+08	0	2042169278	1.62585e+09	5.24994e+08	1.89685e+08	1.06687e+09
F1LP82	1.15713e+08	1.31224e+08	9.96935e+07	0	9.43803e+07	9.21345e+07	4.77398e+07	1.81769e+08	1.91895e+08	3.92719e+06	0	0
F1LPB9	0	0	0	0	0	0	0	0	0	0	1.12998e+08	1.98972e+08
F1LPG3	0	0	1.53836e+08	3.07769e+08	4.76593e+07	1.80322e+08	0	2.43254e+08	1.6629e+08	1.03855e+08	0	0
F1LPP6	5.00219e+07	7.98855e+08	159445594	1.78231e+08	3.41403e+08	0	3.14797e+07	1.55648e+09	1.46707e+08	4.65281e+08	5.00454e+07	6.09e+08
F1LPP9	0	0	6.61066e+07	2.71759e+08	4.79432e+07	0	0	0	0	0	0	0
F1LPS8	1.88053e+08	4.43276e+07	100344099	2.5612e+08	9.48339e+07	3.16155e+07	3.79427e+07	2.69521e+08	2.00663e+08	8.71504e+06	4.5189e+07	5.4443e+07
F1LPV0	7.24816e+08	3.28063e+07	3.72657e+07	2.28629e+08	1.04486e+08	1.27589e+08	4.85366e+07	1.51952e+09	1.86301e+08	0	7.93358e+06	9.59496e+07
F1LQ45	0	0	0	0	0	0	0	0	0	0	0	3.91911e+07
F1LQ63	0	0	0	0	0	0	0	0	0	0	2.41467e+08	7.24858e+08
F1LQ81	1.38536e+09	1.26885e+08	6.23816e+08	1.47568e+09	583513666	5.24306e+08	4.82306e+08	2.67304e+09	1.2575e+09	2.3421e+09	8.26525e+08	1.19767e+09
F1LQM9	0	0	0	0	0	0	0	1.65639e+09	8.26916e+07	7.29322e+06	0	0
F1LQN3	1.60339e+08	3.07037e+07	1.72115e+08	1.28593e+09	7.55092e+07	1.18083e+08	1.71029e+08	421948591	2.72491e+08	2.1325e+08	9.92707e+07	1.34656e+08
F1LQQ6	0	0	0	0	0	1.73282e+08	3.84718e+07	0	6.71963e+08	1.35082e+08	0	0
F1LQT3	3.49783e+08	1.45034e+10	2.79958e+08	1.63869e+08	1.87638e+08	2.42909e+08	1.50826e+08	8.87291e+08	1.79694e+08	8.602e+07	1.80328e+08	4.92128e+08
F1LRI5	0	0	0	0	0	0	0	0	0	0	5.96394e+07	6.45969e+07
F1LRI7	2.16876e+08	3.3864e+07	3.91366e+08	2.91336e+08	0	1.69225e+08	2.68055e+08	7.88231e+08	0	1.9956e+08	1.8344e+08	2.25582e+08
F1LRL9	4.30548e+08	2.78336e+08	1.11531e+09	4.46568e+08	4.04853e+08	7.12276e+08	4.47788e+08	2.86312e+09	6.32148e+08	6.19871e+08	1.4532e+08	5.44512e+08
F1LRN3	4.28353e+08	1.12998e+08	2.81044e+08	4.95779e+08	5.13168e+08	0	0	0	0	0	1284359246	3.85075e+08
F1LRT9	0	0	0	0	0	261810321	4.80599e+08	1.92037e+09	3.17554e+08	2.99841e+08	1.87836e+08	9.55522e+08
F1LRZ7	0	0	0	0	0	0	4.93101e+08	3.3512e+09	0	5.2696e+08	0	0
F1LS42	2.35518e+08	4.10402e+08	8.00757e+07	2.04371e+08	1.45884e+08	1.74905e+08	2.44182e+08	5.70587e+08	2.33755e+08	0	5.20821e+08	9.18416e+07
F1LS86	0	0	0	0	0	0	0	49449688	4.73943e+07	6.46765e+07	5.91479e+07	1.88673e+07
F1LSE6	1.74613e+09	6.69562e+07	1.01829e+08	1.97401e+09	5.97472e+07	2.83924e+08	1.14274e+08	0	4.81228e+08	0	0	0
F1LSH6	1.54766e+07	3.07502e+08	4.85458e+08	2.24695e+07	1.47575e+08	6.4949e+07	2.5118e+07	8.98035e+08	36038284	1.53011e+07	2.76049e+07	2.46049e+07
F1LST2	2.9243e+08	1.06661e+08	1.44013e+07	7.02646e+07	3.10145e+08	1.86486e+07	2.4318e+07	4.47875e+08	1.34799e+08	4.41261e+07	4.54108e+07	6.09508e+07
F1LSY2	9.88044e+08	3.76007e+09	8.93597e+08	3.52414e+09	2.07342e+09	1.53297e+08	1.15961e+09	1.41817e+09	6.56414e+08	6.33779e+08	0	0
F1LT36	9.52691e+07	1.21403e+08	0	3.19696e+07	1.41145e+07	8.58373e+07	0	4.92262e+07	4.24657e+07	0	0	0
F1LT49	0	0	0	0	0	7.61932e+08	3.6974e+08	1.02763e+08	3.86209e+08	0	0	0
F1LTE0	0	0	0	0	0	4.30649e+08	1.71299e+08	2.27558e+08	1.00788e+08	816234579	0	0
F1LU71	7.27583e+07	3.04874e+09	1.30963e+08	3.09223e+07	1.36892e+08	8.17692e+07	0	6.31845e+08	106889201	0	0	0
F1LUA1	4.96286e+08	9.87662e+07	1.64361e+08	1.05595e+08	3.1447e+08	7.59106e+07	3.25319e+08	5.02012e+08	1.04155e+09	0	2.24121e+07	4.41467e+10
F1LUM5	9.94139e+08	1.87397e+08	1.40126e+09	1.41891e+09	1177341658	7.46395e+08	2.39915e+08	3.68162e+09	1.55082e+09	2.08405e+08	2.14337e+08	1.12889e+09
F1LUT4	0	0	0	0	0	6.85238e+07	7.39093e+07	0	4.67611e+08	2.0227e+09	3.93455e+07	2.05107e+08
F1LUV9	1.9418e+09	7.86413e+08	6.04631e+08	1.06819e+09	4.09337e+08	7.58432e+08	5.93043e+08	2042169278	1.62585e+09	5.24994e+08	1.91715e+08	1.06687e+09
F1LV13	8.92087e+08	1.19635e+08	5.62139e+08	8.08143e+07	5.33753e+07	0	3.18904e+07	6.89621e+08	5.26151e+08	1.32217e+08	1.09907e+08	3.86429e+08
F1LVC3	7.04656e+08	1.29182e+08	3.79849e+08	4.86844e+08	671268770	0	0	0	0	0	0	0
F1LW91	0	0	0	0	0	1.62858e+08	4.65132e+08	1.07433e+09	0	485211574	0	0
F1LX07	1.96583e+08	1.71641e+08	1.6932e+08	4.72046e+08	1.6745e+08	1.40973e+08	4.44166e+07	4.33023e+08	3.26977e+08	4.20918e+07	3.60383e+07	2.15019e+08
F1LXA0	4.48612e+07	3.55904e+08	2.29063e+08	0	2.18572e+07	9.44989e+06	1.12694e+09	0	3.69942e+07	0	1.91077e+07	4.19788e+07
F1LY04	0	0	0	0	0	0	0	0	0	0	2.03154e+08	1.40473e+08
F1LY09	110669241	9.59372e+07	0	2.52008e+08	3.12342e+07	0	0	0	0	0	0	0
F1LYA6	7.3892e+07	4.26684e+08	4.34548e+07	73899328	1.01025e+08	3.2927e+07	6.87043e+06	2.71004e+08	4.95932e+07	7.06347e+07	1.03189e+07	6.06748e+07
F1LYQ8	6.63972e+08	1.53519e+07	8.57006e+07	2.89499e+07	6.37827e+08	9.82237e+07	1.48554e+08	2.43544e+09	1.30987e+08	6.43738e+07	2.0346e+07	2.97813e+09
F1LZW6	1.40116e+08	3.35019e+07	1.62687e+08	1.69532e+08	9.43834e+07	1.06865e+08	7.50157e+07	1.06925e+09	1.67195e+08	6.18443e+08	2.05481e+07	1.72213e+08
F1M324	0	0	0	0	0	0	1.08164e+08	4.70351e+07	6.16342e+07	4.49874e+07	0	0
F1M386	0	0	0	0	0	0	3.51025e+08	6.83385e+08	5.87977e+07	2.22426e+07	0	0
F1M3P6	3.59595e+07	4.69173e+08	1.3759e+07	0	8.27798e+07	0	0	0	0	0	1.24557e+07	1.67818e+07
F1M3W5	0	0	0	0	0	1.13463e+08	0	1.05971e+09	1.50873e+08	1.56695e+08	0	0
F1M403	4.64963e+07	1.25099e+07	6.394e+07	2.09941e+08	3.80063e+07	1.70896e+08	0	0	108887132	5.67339e+06	1.742e+08	5.48988e+07
F1M471	3.80902e+08	5.20382e+07	285513287	0	2.90666e+08	0	0	0	0	0	0	0
F1M4A0	0	0	0	0	0	0	5.65703e+07	9.41215e+08	0	3.60102e+08	0	0
F1M4I4	0	0	0	0	0	0	4.90438e+06	2.06961e+08	2.26255e+07	3.19936e+07	0	0
F1M4R7	0	0	2.14181e+07	2.86892e+07	2.06309e+07	0	0	0	0	0	0	0
F1M542	6.84735e+07	3.4233e+08	4.19183e+07	1.04409e+08	4.17768e+07	0	2.99145e+07	1.80866e+08	9.72629e+07	4.01339e+07	0	0
F1M5M9	82955809	2.95926e+08	7.02006e+07	1.63695e+08	1.91569e+08	0	1.31186e+08	7.85117e+07	0	2.6528e+08	0	0
F1M5N4	4.93915e+07	1.58512e+07	1.02974e+08	1.40582e+08	5.99978e+07	1.97674e+08	4.60486e+07	101021725	2.58556e+08	0	0	0
F1M6V1	0	0	9.85615e+07	4.26072e+07	2.85408e+07	2.82434e+07	0	2.15763e+08	3.72685e+07	6.0032e+07	0	0
F1M6Y8	4.14945e+07	1.18393e+09	5.48225e+08	1.74335e+09	8.17369e+07	1.3739e+09	1.0506e+08	1.26831e+09	3.17348e+08	1.36659e+08	0	0
F1M779	0	0	0	0	0	1.20282e+09	0	4.37849e+09	0	1.24677e+09	0	0
F1M787	0	0	4.77261e+08	2.02338e+08	1.08249e+08	5.37995e+08	7.23897e+07	1.34146e+09	0	1.07344e+08	0	0
F1M7K7	5.18749e+07	7.14151e+08	6.44952e+07	6.09202e+07	0	0	8.38715e+07	1.73936e+08	4.4839e+08	0	5.06108e+07	1.09167e+08
F1M7V6	4.15158e+08	5.4096e+07	3.59403e+07	6.13332e+08	3.84313e+07	1.37493e+08	1.14844e+07	1.37766e+09	1.5206e+08	0	8.25456e+06	2.3742e+07
F1M7X3	4.84737e+07	1.29967e+08	5.0861e+07	1.18375e+08	2.52431e+08	6.27503e+07	2.68156e+07	3.6622e+08	2.60942e+08	3.4186e+07	3.82091e+06	2.99602e+08
F1M842	0	0	0	0	0	0	4.10218e+08	4.1942e+08	1383058709	0	3.96062e+08	1.60682e+08
F1M8A4	3.8731e+07	51093629	5.30727e+07	1.41991e+08	0	5.7333e+07	0	2.94256e+08	2.11763e+09	6.2571e+07	0	0
F1M8G9	5.90686e+08	1.05867e+07	0	1.76286e+08	7.32144e+07	2.15716e+09	6.07704e+08	2.7957e+08	4.12757e+08	5.02504e+08	6.7076e+07	1.2774e+08
F1M8K0	1.50604e+07	1.69587e+08	1.99125e+07	0	4.50921e+06	0	0	0	0	0	0	0
F1M978	0	0	0	0	0	1.51618e+07	1.47556e+07	7.9668e+07	5.43275e+07	0	0	0
F1M9G8	2.13658e+06	7.8999e+08	9.12197e+06	0	4.92141e+06	7.52282e+06	9.35272e+06	2.89897e+07	2.61026e+07	1.20503e+07	0	0
F1M9N9	4.56769e+08	3.8244e+09	2.18135e+08	1.33168e+09	2.53339e+08	3.86378e+08	2.99363e+08	2.62005e+09	7.19619e+08	2.59526e+08	3.95404e+08	559300402
F1M9V7	3.64906e+08	2.34491e+08	2.51428e+08	5.54125e+08	4.40005e+08	1.92962e+08	1.33823e+08	1.01747e+09	4.37184e+08	2.18952e+08	2.58882e+08	3.92122e+08
F1MA36	3.23736e+08	5.43741e+09	4.50418e+08	0	8.36355e+08	0	3.37854e+08	7.39228e+09	9.3797e+08	4.57792e+08	561448448	9.00938e+08
F1MAA3	6.88788e+07	5.98334e+07	0	8.63978e+08	8.51665e+07	0	0	0	0	0	0	0
F1MAA5	0	0	0	0	0	0	0	5.98367e+08	7.96806e+07	4782785	0	0
F1MAH8	0	0	0	0	0	0	0	0	0	0	8.93368e+08	2.43365e+08
F1MAK3	0	0	0	0	0	0	0	0	0	0	6.55054e+07	6.2692e+08
F1MAL6	0	0	0	0	0	0	0	0	0	0	3.92905e+08	1.61838e+09
F1MAQ5	0	0	0	0	0	0	8.86309e+08	2.14652e+09	1.76406e+09	9.08755e+08	0	0
O08557	0	0	0	0	0	3.40421e+08	0	6.50917e+07	1.69569e+08	0	0	0
O08629	3.1904e+08	3.80181e+07	9.51632e+07	7.62294e+08	1.37433e+08	1.70787e+07	0	2.95335e+07	7.22977e+07	6.12329e+08	0	0
O08651	6.85258e+07	8.25195e+07	2.99019e+07	0	7.6362e+07	2.23869e+07	1.19982e+07	9.35963e+07	2.2878e+07	0	0	0
O08662	0	0	0	0	0	1.02305e+09	2.27828e+08	1.60334e+09	1.1647e+08	0	4.8441e+07	167333416
O08679	0	0	0	0	0	0	7.16404e+08	3.60793e+08	1.51955e+08	0	1.51174e+08	1.93083e+08
O08700	0	0	0	0	0	3.9538e+07	1.54983e+07	1.78899e+07	2.0887e+08	0	0	0
O08838	1.1781e+09	2.90312e+07	2.75814e+08	1.98489e+09	9.14917e+09	4.1589e+08	562377149	1.37758e+09	1.01803e+09	6.53318e+08	2.17728e+08	629348913
O08839	0	0	1.59411e+08	2.43162e+08	1.83173e+08	0	0	0	0	0	0	0
O08875	8.77914e+07	2.05699e+08	1.12934e+08	4.98044e+07	6.11204e+07	1.84255e+07	3.48636e+07	4.45143e+07	8.88818e+07	3.0151e+07	3.07037e+07	6.05107e+07
O09175	9.57973e+07	2.48142e+08	2.48278e+08	3.03756e+07	19355218	1.94037e+07	0	66701943	1.35617e+08	2.13013e+07	0	0
O35077	1.41604e+08	9.28886e+06	3.40273e+07	0	1.02149e+07	0	0	0	0	0	0	0
O35095	1.82012e+08	2.66037e+07	1.00061e+08	2.26629e+08	1.06453e+08	1.23476e+08	7.05107e+08	5.64316e+08	2.47606e+08	8.67866e+07	6.55669e+07	2.04617e+08
O35244	1.21278e+08	3.09948e+08	1.50763e+08	1.31448e+08	77762551	4.68574e+07	7.6549e+07	1.16405e+08	1.42292e+08	6.77876e+06	3.98194e+07	1.21489e+08
O35264	2.70489e+07	1.24117e+08	1.22551e+07	2.7569e+07	8051295	1.31829e+07	1.17739e+07	3.05213e+07	2.62099e+07	0	6.20493e+06	3.71227e+06
O35274	3.63419e+08	3.51895e+07	2.78231e+07	1.90225e+08	1.03594e+08	3.83327e+07	3.99473e+07	1.4834e+08	1.14308e+08	1.09289e+08	0	0
O35303	1.59932e+08	2.70024e+08	1.41799e+08	0	1.15515e+08	1.23533e+08	5.47448e+07	5.12133e+08	5.01344e+08	1.36852e+08	1.0306e+08	1.43809e+08
O35356	0	0	0	0	0	1.38084e+07	0	34930056	4.17047e+07	0	0	0
O35430	0	0	0	0	0	5.7513e+07	1.98076e+07	0	3.83407e+07	0	0	0
O35458	6.98269e+07	1.96167e+08	3.97267e+07	9.66463e+07	3.80865e+08	6011571	1.84018e+07	1.77673e+08	8.84571e+07	1.70162e+07	2.97346e+07	8.05122e+07
O35509	4.41087e+08	4.30972e+07	2.79417e+08	4.62547e+08	4.47088e+07	5.11188e+07	8.85586e+07	8.10368e+08	3.19037e+08	0	2.23609e+07	47270768
O35567	2.99737e+08	8.58061e+06	4.6512e+07	0	1.59289e+08	3.77513e+07	1.77323e+08	1.00724e+08	5.34407e+08	0	5.41425e+07	3.24387e+07
O35796	0	0	0	0	0	1.85563e+07	1.38669e+07	4.19638e+09	0	0	0	0
O35814	5.0295e+08	4.86018e+08	5.64629e+08	1.18041e+09	5.35052e+08	2.69083e+08	1.18171e+08	1.81084e+09	3.33017e+08	0	1.70674e+08	4.12614e+08
O35889	0	0	0	0	0	0	1.29498e+09	8.37693e+08	1.18613e+08	2.96884e+08	1.96141e+08	7.47832e+08
O54755	8.33389e+07	8.23331e+06	7.32833e+06	0	5.60477e+07	3.45554e+07	8.08604e+06	242205440	5.26888e+07	9.00302e+06	0	0
O54922	0	0	0	0	0	9.65785e+06	0	5.73518e+08	2.40449e+08	4.6668e+07	0	0
O54924	0	0	0	0	0	1.56161e+09	0	9.49095e+07	1.44353e+07	0	0	0
O54975	1.91451e+08	1.62041e+07	5.91388e+07	0	2.21232e+07	9.75731e+07	0	1.41117e+08	7.32522e+07	0	8.34748e+07	4.39618e+07
O55096	0	0	0	0	0	0	2.16275e+07	6.5166e+07	0	7.40535e+06	0	0
O70196	0	0	0	0	0	6.49728e+07	0	1.41309e+08	0	1.31856e+07	0	0
O70257	2.41776e+07	1.29365e+08	3.84483e+07	0	9.40835e+07	0	0	0	0	0	0	0
O70371	1.13533e+08	1.8132e+07	0	6.73538e+07	3.71704e+07	0	0	0	0	0	0	0
O70511	7.2187e+08	8.03057e+07	1.45817e+09	4.97654e+08	9.29443e+08	6.77693e+08	3.21936e+08	3.17614e+09	5.6143e+08	9.26871e+07	1.30576e+09	7.00672e+09
O88339	1.43848e+08	2.32366e+07	3.76938e+08	1.00428e+08	3.46258e+07	1.18296e+08	6.56613e+07	4.57114e+08	1.97185e+08	1.36394e+08	0	0
O88377	7.25713e+07	3.61302e+08	0	4.51008e+07	1.14017e+09	0	0	0	0	0	2.4232e+07	2.60486e+07
O88407	0	5.61693e+07	1.25167e+07	3.15536e+07	0	1.50897e+08	8450622	1.44724e+08	51249226	0	0	0
O88453	1.71309e+08	1.55466e+08	126984607	0	9.87871e+07	6.89768e+07	5.65367e+07	1.58383e+09	0	2.42992e+08	0	0
O88480	0	0	0	0	0	0	2.03149e+08	9.47924e+07	1.33393e+08	0	0	0
O88521	0	0	0	0	0	0	3.19225e+08	1.26542e+09	1.11186e+09	0	0	0
O88565	6.80999e+07	5.06108e+07	2.96738e+07	0	3.65386e+07	0	0	0	0	0	0	0
O88600	0	0	0	0	0	4.37924e+08	0	1.57343e+09	1.42527e+09	9.67383e+08	0	0
O88767	0	0	0	0	0	3.47759e+08	7.31746e+07	0	1.87896e+08	0	0	0
O88871	4.29471e+07	4.28416e+07	5.87851e+07	2.44026e+08	5.79839e+06	1.57108e+07	0	1.71818e+08	7.19549e+07	1.02689e+08	8.41534e+06	5.2238e+08
O88954	0	0	5.0965e+06	5.18106e+09	2.00975e+07	1.82331e+08	3.76358e+07	8.14666e+07	0	0	0	0
O88989	1.23362e+09	1.91715e+08	8.44666e+08	9.1292e+08	8.46018e+08	3.55245e+08	3.52725e+08	1.57441e+09	1.13214e+09	7.62637e+07	5.48462e+08	6.59843e+08
O89046	5.31069e+07	4.03153e+09	9.51664e+07	946530727	2.484e+07	3.82179e+07	3.46262e+07	3.10849e+07	1.51073e+07	0	1.8132e+07	2.50808e+07
P00388	0	0	1.61455e+08	8.06412e+08	1.0673e+09	2.67613e+07	2.48773e+08	4.80918e+08	5.91243e+07	1.66965e+08	0	0
P00507	1071765497	205782441	6.66974e+08	1.16839e+09	2.52751e+09	3.37628e+08	2.89339e+08	1.24347e+09	8.28759e+08	2.71278e+08	3.88368e+08	6.32316e+08
P00762	6.99766e+10	7.43578e+06	130868653044	1.05422e+11	120853903096	3.50832e+09	1306312279	96628099000	3441825647	5.63383e+10	3.22572e+09	7.2513e+10
P01830	5.48015e+08	2.61615e+08	2.88522e+08	415679828	2.7989e+08	1.6488e+08	8.84254e+07	5.83581e+08	6.59781e+08	50089916	2.87396e+08	2.95996e+08
P01946	1.8964e+09	1.23177e+08	1.20438e+09	2.80697e+09	1.18548e+09	3.92408e+08	3.63439e+08	1.85831e+09	1.43807e+09	2.80655e+08	7.39885e+08	1.06876e+09
P02091	1.98843e+09	4.986e+06	1.32072e+09	3.5598e+09	1.1805e+09	8.08442e+08	5.12149e+08	2.4449e+09	1.46163e+09	3.33776e+08	8.76445e+08	1.59391e+09
P02454	0	0	0	0	0	0	0	0	0	0	5.13625e+07	1.62466e+08
P02650	8.71128e+07	1.35003e+08	6.37444e+07	4.58684e+07	9.11084e+07	3.80035e+07	1.5668e+08	8.01867e+07	2.79905e+08	7.37284e+06	8.7178e+07	5.73085e+07
P02688	7.61921e+09	9.34333e+07	4.51442e+09	7.48127e+09	3.52619e+09	2.77723e+09	1.60744e+09	1.1263e+10	9.93953e+09	2.02641e+09	1.06469e+09	4.18217e+09
P02770	4.93889e+08	2.41467e+08	2.84794e+08	7.8948e+08	3.22731e+08	2.15501e+08	1.62057e+08	1.0052e+09	5.41868e+08	1.40209e+08	3.21253e+08	4.99489e+08
P03994	2.07348e+08	2.34308e+07	1.53595e+08	0	2.01424e+08	0	0	4.02236e+08	2.22212e+08	5.0197e+07	0	0
P04166	0	0	0	0	0	1.47604e+07	3.29924e+07	0	3.29461e+07	0	0	0
P04182	0	0	2.38483e+08	0	2.34188e+08	0	0	0	0	0	0	0
P04636	1.34122e+09	3.07039e+07	9.3032e+08	7.54413e+08	6.33143e+08	4.7956e+08	4.76811e+08	1.63241e+09	9.42839e+08	6.37457e+07	3.70643e+08	7.07651e+08
P04636	1.34122e+09	3.07039e+07	9.3032e+08	7.54413e+08	6.33143e+08	4.7956e+08	4.76811e+08	1.63241e+09	9.42839e+08	6.37457e+07	3.70643e+08	7.07651e+08
P04642	9.41362e+08	1.91101e+08	7.64396e+08	7.97673e+08	5.88466e+08	1.84936e+08	3.70962e+08	1212250224	9.93551e+08	8.4794e+07	6.0384e+08	8.64933e+08
P04762	3.82463e+08	7.67032e+07	0	1.00677e+08	6.59892e+06	0	0	0	0	0	0	0
P04764	2.55446e+09	7.95788e+08	1.25118e+09	1.98764e+09	7.6468e+08	8.52435e+08	8.04438e+08	2.32311e+09	2.08272e+09	0	5.78398e+08	6.77577e+08
P04785	3.49624e+08	8.70881e+08	1.43531e+07	2.04389e+06	2.69901e+07	5.56992e+08	1.95487e+07	6.35819e+07	3.89008e+07	0	4.91027e+07	6.36172e+07
P04797	4.88834e+09	3.92178e+07	3.73869e+09	4.11728e+09	3.17991e+09	2.91797e+09	1.57504e+09	6.53864e+09	5.25328e+09	9.80735e+08	2.52511e+09	4495828656
P04897	7.87772e+08	5.68687e+08	3.95765e+08	9.05694e+08	3.9643e+08	1.98756e+08	1.82151e+08	8.77785e+08	6.51234e+08	0	1.59127e+08	4.0654e+08
P04906	3.53587e+08	7.97169e+07	1.39708e+08	4.36707e+08	1.35225e+08	7.39333e+07	2.82193e+08	2.41884e+08	2.61359e+08	7.09575e+06	5.82605e+07	4.30467e+08
P05065	1.92158e+09	2.35371e+07	1.36268e+09	1.97189e+09	9.52498e+08	2.14149e+09	4.78975e+08	2.73647e+09	1.78652e+09	1.54841e+08	8.80086e+08	1.83079e+09
P05197	3.04358e+08	1.44989e+08	6.38633e+08	5.39037e+08	2.90311e+08	1.30649e+08	8.50253e+07	1.08108e+09	2.69746e+08	3.30506e+08	6.32639e+07	4.2011e+08
P05370	1.86594e+07	1.27987e+08	8.42439e+07	6.36075e+07	3.78062e+07	8.06108e+06	1.57386e+07	3.28784e+07	3.78234e+07	0	0	0
P05696	3.12349e+08	1.522e+08	0	1.27513e+08	4.73762e+07	7.72918e+07	7.03337e+07	1.8248e+08	1.52028e+08	5.52362e+07	0	0
P05708	6.05205e+08	7.33998e+08	4.52581e+08	8.69593e+08	3.76113e+08	5.72589e+08	3.12499e+08	1.87882e+09	1.29157e+09	7.42026e+08	5.39335e+08	1.00999e+09
P06685	4.257e+09	2.92209e+08	2.51475e+09	7.74979e+09	1.29562e+09	4.57448e+09	3.66827e+09	1.32125e+10	6.78017e+09	4.16417e+09	3608389883	5.36054e+09
P06686	4.47044e+09	2.36774e+08	2.65954e+09	9.02958e+09	1.45229e+09	4.92018e+09	3.97442e+09	1.64861e+10	8039929140	5.39051e+09	3.8244e+09	7.38934e+09
P06687	0	0	2.65954e+09	9.02958e+09	1.45229e+09	4.92018e+09	3.97442e+09	1.64861e+10	8039929140	5.39051e+09	3.8244e+09	7.38934e+09
P06761	1.2297e+09	3.53535e+08	1.14731e+09	2.3391e+09	7.25456e+08	5.39002e+08	8.24135e+08	3.04418e+09	1.93373e+09	4.21129e+08	7.53011e+08	1.2719e+09
P07323	2.74063e+09	2.58882e+08	1.11099e+09	1.80154e+09	7.99862e+08	9.06255e+08	8.95635e+08	1914651506	1.83665e+09	1.18017e+08	6.79877e+08	9.5307e+08
P07335	2.73302e+09	6303034	1.78147e+09	4.1759e+09	1.24083e+09	1.63735e+09	1.24921e+09	3.41276e+09	2.38673e+09	3.48405e+09	1.21382e+09	1.35561e+09
P07340	3.21235e+09	3.57163e+07	1.42576e+09	2.28877e+09	1.4681e+09	1.00738e+09	9.22034e+08	7.03904e+09	3.11606e+09	3.56705e+08	1.00471e+09	1.45362e+09
P07722	1.96325e+08	3.36841e+07	1.24554e+08	1.41756e+08	8.76822e+07	1.66585e+08	1.05928e+08	6.44698e+08	4.27965e+08	188241526	2.89496e+07	2.26831e+08
P07825	9.09143e+08	1.02212e+08	6.38804e+08	8.50791e+08	5.05027e+08	2.40814e+08	2.19819e+08	1963686907	1.51418e+09	2.82828e+08	1.25515e+08	8.81787e+08
P07895	2.77517e+08	3.87397e+07	1.77615e+08	2.39122e+08	1.49573e+08	1.86265e+07	9.64991e+06	2.42901e+08	1.35804e+08	0	50891549	9.18006e+07
P07936	4.23706e+08	9.07414e+07	2.90669e+08	3.39721e+08	1.14304e+08	1.10205e+08	6.92478e+07	2.39185e+08	2.53934e+08	8.71434e+07	4.94364e+07	1.52395e+08
P07943	2.11461e+07	3.25814e+07	2.43864e+07	2.35083e+07	1.73944e+07	3.32172e+06	0	4.66243e+07	3.04037e+07	0	0	0
P08009	2.80077e+08	3.47755e+08	2.22409e+08	2.47916e+08	1.69246e+08	8.97968e+07	3.56136e+07	2.68476e+08	2.63777e+08	4.55281e+07	4.771e+07	2.28192e+08
P08050	1.20097e+08	9.33147e+07	7.41766e+07	1.23001e+08	4.81166e+07	1.85678e+07	3.79001e+07	2.6084e+08	1.36539e+08	3.08516e+07	7.97169e+07	8.72477e+07
P08082	0	0	2.96149e+07	1.05011e+08	3.07731e+06	0	0	0	0	0	0	0
P08413	2015924009	3.14382e+07	1.40684e+09	2.19236e+09	1.25012e+09	0	8.79523e+08	4003802269	2.63197e+09	0	4.97965e+08	1.85778e+09
P08461	4.35481e+08	3608389883	3.33613e+08	6.29594e+08	2.56357e+08	2.28227e+08	2.9551e+08	8.65386e+08	5.40872e+08	9.67996e+07	3.00082e+08	4.14271e+08
P08482	1.67809e+07	1.43875e+07	5.95626e+07	1.38888e+07	0	0	0	0	0	0	0	0
P08592	0	0	0	0	0	3.54833e+07	3.4454e+07	5.82735e+07	61786522	1.24779e+08	0	0
P09117	5.44775e+08	9.27824e+07	4.83126e+08	4.83572e+08	4.36888e+08	2.19129e+08	2.38978e+08	6.98739e+08	4.20868e+08	9.50138e+07	3.62929e+08	3.82037e+08
P09456	1.53943e+07	3.91372e+09	1.7722e+08	4.79967e+06	0	0	0	0	0	0	2.15962e+07	1.23274e+08
P09527	0	0	2.93424e+07	5.01231e+07	8.51253e+07	1.54468e+07	1.62107e+07	2.74078e+07	4.13532e+08	0	2.35506e+07	2.23248e+07
P09606	8.82657e+08	4.12294e+08	7.96843e+08	1.37884e+09	8.61182e+08	9.48515e+08	5.56874e+08	2.33487e+09	1367693096	2.20418e+08	3.47755e+08	1.36502e+09
P09951	1.75873e+09	6.05652e+07	1.75724e+09	2.24787e+09	1.39161e+09	9.61762e+08	1.09902e+09	4.44403e+09	1.97748e+09	7.70908e+08	1.37165e+09	1.6835e+09
P0C1X8	2.16876e+08	8.23208e+07	3.91366e+08	2.91336e+08	1.51529e+08	1.69225e+08	2.68055e+08	7.88231e+08	4.30209e+08	1.9956e+08	1.8344e+08	2.25582e+08
P0C5W1	0	0	0	0	0	4.83315e+07	2.3227e+07	0	3.93429e+08	0	0	0
P0C5X8	0	0	1.95216e+07	1.03322e+08	57599003	0	0	0	0	0	3.41998e+07	4.7129e+07
P0C5Y8	9.09864e+08	2.82506e+07	3.80853e+08	1.57972e+09	0	0	0	0	0	0	0	0
P10111	1.02642e+09	5.93016e+07	6.85302e+08	2.37564e+09	4.5746e+08	9.7828e+08	8.17709e+08	2045541063	9.20899e+08	1.50316e+09	279977353	7.41262e+08
P10536	5.29049e+08	3.08431e+08	4.16397e+08	1.97782e+09	2.50277e+08	0	0	0	0	0	7.80384e+07	1.96007e+09
P10687	5.73871e+08	5.46157e+07	2.64948e+08	3.08963e+08	2.4173e+08	108820254	1.935e+08	5.95123e+09	1.57471e+08	1.82069e+08	5.30892e+07	1.08862e+08
P10719	2.37142e+09	3.2099e+08	2.63899e+09	3.83904e+09	2.08581e+09	1.85844e+09	1.44475e+09	4.73503e+09	2.9954e+09	1.7888e+09	1.19742e+09	1.5895e+09
P10760	6.50257e+07	4.05265e+08	1.70887e+08	5.06515e+07	0	0	0	0	0	0	0	0
P10824	5.27821e+08	2.0346e+07	3.86064e+08	9.62094e+08	3.87778e+08	2.04875e+08	1.66131e+08	8.52546e+08	6.0265e+08	0	1.59127e+08	3.83855e+08
P10860	4.9631e+08	2.18921e+08	2.46569e+08	4.48362e+08	2.32393e+08	2.87287e+08	1.62811e+08	734969909	5.40177e+08	7.31087e+07	1.27987e+08	3.46588e+08
P10888	3.71987e+08	2.4424e+08	3.9781e+08	5.53662e+08	3.93612e+08	1.77705e+08	1.97152e+08	8.18986e+08	5.03883e+08	1.10333e+08	7.03034e+07	3.802e+08
P11275	2.20651e+09	3.90396e+08	1.7254e+09	2.70892e+09	1.61061e+09	8.74173e+08	957533704	5.15068e+09	3.10816e+09	3.18599e+08	6.79908e+08	2.56395e+09
P11348	2.13549e+08	1010252013	1.39316e+08	3.43016e+08	1.05888e+08	6.36837e+06	4.7671e+07	3.17158e+08	2.18383e+08	1.66204e+07	3.8414e+07	583953066
P11505	6.74271e+08	7.38504e+08	4.42018e+08	1.06462e+09	3.16075e+08	5.77955e+08	4.96637e+08	1.86635e+09	1.15432e+09	7.36605e+08	3.91047e+08	1.13625e+09
P11506	6.19044e+08	5.50418e+08	3.47788e+08	1.02827e+09	2.84461e+08	7.16772e+08	4.06466e+08	1.81599e+09	1.11573e+09	7.0705e+08	3.08431e+08	1.08111e+09
P11517	1.50794e+09	1.4082e+08	9.76136e+08	2.34539e+09	0	4.01071e+08	2.71151e+08	1.38318e+09	0	0	3.2099e+08	1.01996e+09
P11598	1.61428e+08	1.69502e+08	1.0927e+08	1.33697e+08	8.51786e+07	3.6283e+07	3.72611e+07	5.41512e+08	1.71972e+08	2.65143e+07	1.10088e+08	7.31995e+07
P11608	5.96804e+06	2.4232e+07	2.90046e+07	5.45455e+06	0	0	0	0	0	0	0	0
P11730	1.76768e+09	5.07684e+08	1.22675e+09	0	1.24959e+09	0	0	0	0	0	0	0
P11884	1.22148e+08	2.58496e+07	4.76204e+07	5.5714e+07	3.60343e+07	0	0	0	0	0	0	0
P11980	2.39902e+09	2.47891e+08	2.1113e+09	2.53065e+09	1.07612e+09	1.27633e+09	1.16075e+09	4.68439e+09	2.35455e+09	2.76971e+08	5.07684e+08	1.55129e+09
P12075	0	0	4.55497e+07	2.63971e+07	3.31147e+07	0	0	0	0	0	0	0
P12369	2.5532e+08	4.89333e+08	8.5984e+07	1.70295e+08	1.06197e+08	4.62994e+07	6.43637e+07	100407283	1.51655e+08	0	5.10083e+07	2.50317e+08
P12785	1.28204e+08	3.36043e+08	1.67899e+08	1.9378e+08	0	9.82249e+07	1.52603e+08	654747489	5.45243e+08	2.15649e+08	2.34295e+08	3.80438e+08
P12839	1.23757e+09	1.30757e+08	5.91045e+08	1.01227e+09	4.98401e+08	6.68014e+08	5.31722e+08	2.3107e+09	1.28867e+09	7.61854e+08	3.66124e+08	1.23339e+09
P13086	2.31032e+08	1.79589e+08	1.31882e+08	8.3856e+07	1.36285e+08	4.30393e+07	3.30211e+07	1.5797e+08	6.39898e+07	105485615	4.1817e+07	7.18032e+07
P13221	1.92039e+09	6.97535e+07	6.44317e+08	9.27239e+08	4.20876e+08	4.01052e+08	2.64823e+08	1.20145e+09	7.37021e+08	1.67944e+07	3.08924e+08	5.85486e+08
P13233	2.02019e+09	8.43547e+08	1.24988e+09	1393339841	8.99997e+08	9.17612e+08	6.85492e+08	2.44346e+09	1.97356e+09	2.38528e+08	7.8999e+08	1.75916e+09
P13234	2.93923e+07	4.50743e+08	4.68641e+07	8.11675e+07	1.88671e+07	4.39607e+07	1.6878e+07	1.21459e+08	8.74523e+07	2.09477e+08	8.36684e+06	2.4581e+07
P13264	3.04296e+08	7.08245e+07	2.99769e+08	3.28345e+08	2.06558e+08	1.96791e+08	8.72727e+07	9.4955e+08	3.45647e+08	7.23559e+08	1.51091e+08	4.22654e+08
P13383	8.79753e+08	1.92893e+08	0	4.31872e+08	4.29676e+07	1.15241e+10	5.08291e+07	5.33161e+08	4.84944e+08	0	1.60865e+08	2.92604e+08
P13471	3.97917e+07	3.2765e+07	4.22996e+07	0	32208127	0	0	0	0	0	0	0
P13638	0	0	0	0	0	0	9.15021e+07	5.13708e+08	2.72391e+08	4.86502e+07	0	0
P13676	1.00248e+08	4.8441e+07	1.94722e+07	2.5894e+07	0	1.22567e+08	2.65154e+07	0	1.6586e+08	0	0	0
P13697	2.14668e+07	2.33028e+08	9.26623e+07	0	1.13296e+08	0	0	0	0	0	0	0
P13803	291841152	2.4274e+08	8.81836e+06	7.95143e+06	7.83942e+07	0	0	0	0	0	0	0
P14046	1.38508e+08	3.06976e+07	5.72003e+07	0	6.96961e+07	7.23228e+07	1.90002e+08	2.00807e+09	3.78914e+08	51142238	2.85571e+07	3.04788e+08
P14408	1.70287e+08	1.01143e+08	1.39575e+08	9.53967e+08	9.33444e+07	5.75392e+07	0	1.29623e+09	1.66783e+08	0	0	0
P14562	0	0	0	0	0	0	0	1.73079e+09	5.16919e+08	289521	6.04905e+08	4.2982e+08
P14841	4.06138e+07	2.65153e+07	5.07349e+07	8.13283e+07	3.00327e+07	5.9205e+08	1.27245e+07	0	69356569	3.65445e+07	0	0
P14882	0	0	1.26287e+08	4.17273e+07	1.76211e+08	1.28244e+08	3.34906e+07	5.68417e+07	0	4.07662e+08	0	0
P15650	1.04599e+08	3.04894e+08	2.15306e+07	0	2.48251e+08	0	0	0	0	0	0	0
P15791	2015924009	6.60094e+08	1.40684e+09	2.19236e+09	1.25012e+09	6.52972e+08	0	4003802269	2.63197e+09	0	4.97965e+08	1.83304e+09
P15865	0	0	0	0	0	9.81712e+07	2.67565e+08	0	3.7162e+08	0	0	0
P15943	0	0	0	0	0	2.87372e+07	0	2.38228e+08	1.45988e+08	0	0	0
P15999	2.49465e+09	1.89685e+08	1.87627e+09	2.10969e+09	1.28349e+09	1.0798e+09	9.24879e+08	2.90016e+09	2.17529e+09	1.80582e+08	5.94e+08	1.49482e+09
P16446	1.07754e+08	3.70371e+09	7.41711e+07	1.46945e+09	2.93705e+07	1.3617e+07	3.37045e+07	1.00405e+08	2.714e+07	0	2.38391e+07	4.78319e+07
P16617	9.75665e+08	4.45836e+07	8.58163e+08	9.04541e+08	7.20879e+08	4.44984e+08	3.99944e+08	1.39168e+09	1.0573e+09	1.50953e+08	2.78336e+08	6.89667e+08
P17105	1.31805e+08	4.77697e+07	9.97853e+06	0	5.36014e+07	0	0	0	0	0	0	0
P17764	8.3702e+07	1.27438e+07	6.12739e+07	6.16458e+07	4.24518e+07	3.62786e+07	1.09624e+07	3.10779e+08	8.91812e+07	0	4.80289e+07	3.63084e+07
P18088	1.04549e+08	1.41827e+08	4.04394e+07	0	3.23784e+07	0	0	0	0	0	1.17326e+08	1.19721e+08
P18163	0	0	0	0	0	0	0	0	0	0	3.36841e+07	1.71767e+08
P18266	1.33313e+07	3.53169e+07	2.86026e+07	9.61171e+06	0	2.04799e+08	1.79112e+07	1.11262e+08	1.44802e+07	0	1.88141e+08	9.68606e+06
P18418	2.82816e+08	1.78756e+08	1.38251e+08	2.75207e+08	1.30848e+08	1.45599e+08	6.87383e+07	2.92968e+08	3.26747e+08	3.21028e+07	1.45164e+08	1.91541e+08
P18421	0	0	0	0	0	0	0	0	0	0	1.63017e+07	6.46103e+07
P19139	0	0	9.35706e+07	7.62094e+07	1.33383e+08	0	0	0	0	0	0	0
P19234	1.0987e+08	4.90159e+07	4.35675e+07	2.66892e+08	1.00317e+08	2.90549e+07	2.61257e+07	6.06172e+08	5.79127e+07	0	4.986e+06	3.56152e+07
P19468	0	0	0	0	0	0	2.87093e+07	4.98286e+08	4.89343e+07	0	0	0
P19490	0	0	0	0	0	3.77156e+07	0	4.91744e+08	2.12972e+08	4.59082e+07	0	0
P19492	78695573	1.8344e+08	1.25099e+10	3.10453e+08	3.84657e+07	1.3523e+09	3.98159e+08	4.15128e+08	2.18943e+08	8.76467e+07	829576506	154813965
P19511	1.96555e+08	3.90099e+07	1.49915e+08	1.02518e+08	1.2952e+08	6.55106e+07	2.40902e+07	9.84475e+07	2.25144e+08	0	1.88806e+08	1.29436e+08
P19527	1.87929e+09	1.85673e+07	1.08629e+09	1.56179e+09	8.5656e+08	9.36598e+08	9.12256e+08	3.3161e+09	2.53736e+09	4.30269e+08	4.89333e+08	1.47962e+09
P19627	1.084e+08	3.26035e+07	1.16303e+09	2.49554e+09	7.11915e+07	4.34726e+08	8.54097e+08	46775903	5.6265e+07	0	1.53791e+07	2.74205e+07
P19804	0	0	0	0	0	6.62766e+07	5.88775e+07	6.09064e+08	0	1.77248e+07	0	0
P19945	22703590	5.19416e+08	1.10516e+08	0	3.21883e+08	1.6731e+07	0	1.04204e+08	6.83697e+07	0	3.46435e+06	3.17595e+06
P20059	3.77856e+08	1.1207e+08	0	5.77872e+08	3.85655e+07	0	0	0	0	0	0	0
P20651	0	0	0	0	0	1.86916e+08	8.54413e+07	8.85696e+08	0	0	0	0
P20788	1.79431e+08	3.53615e+08	6.42962e+07	1.1797e+08	1.91796e+08	6.55646e+07	78079413	4.21838e+08	1.7964e+08	5.26331e+07	8.93749e+07	2.9586e+08
P21531	1.54294e+08	2.41467e+08	1.87984e+08	9.90532e+08	8.21895e+07	0	0	0	0	0	2.2844e+07	8.58553e+07
P21575	1.0805e+09	3.46435e+06	8.8641e+08	1.59702e+09	1.80771e+09	8.94649e+08	8.05372e+08	3.26404e+09	1.56488e+09	1.19482e+09	5.68687e+08	1.39726e+09
P21707	1.18915e+09	1.88081e+07	9.1859e+08	1675276436	4.96087e+08	6.13473e+08	5.58782e+08	2.44893e+09	1.5614e+09	2.62304e+08	5.11133e+08	6.00397e+08
P21708	8.54142e+07	3.93235e+08	6.58531e+07	0	1.93546e+07	0	0	0	0	0	0	0
P21913	1.48418e+08	3.66817e+08	1.71309e+08	0	1.01164e+08	3.20131e+07	2.97721e+07	0	5.72122e+07	0	0	0
P22062	1.4324e+08	5.29094e+07	8.03806e+07	4.69538e+07	5.34185e+07	0	1.68413e+07	3.32221e+08	3.29683e+08	0	0	0
P22063	1.86209e+08	1.36045e+08	1.13484e+08	2.04714e+08	1.39333e+08	2.11159e+08	6.90032e+07	2.51512e+08	1.06315e+08	1.72679e+08	3.28063e+07	7.50154e+07
P23565	1.30355e+09	2.41211e+07	7.26231e+08	1.17254e+09	5.73193e+08	7.20447e+08	5.66918e+08	2.29256e+09	1.58906e+09	3.51406e+08	3.04174e+08	1.24163e+09
P23965	0	0	0	0	0	0	0	0	0	0	7.53011e+07	1.23356e+08
P23978	2.35395e+08	8.2659e+07	1.59718e+08	2.85089e+08	1.22841e+08	2.50212e+08	5.56047e+07	6.23236e+08	3.19549e+08	7.64702e+07	1.20259e+08	2.4844e+08
P24155	0	0	0	0	0	2.48124e+08	2.55791e+07	9.8572e+07	1.75128e+08	3.5933e+07	1.51922e+08	583738498
P24268	8.61418e+07	2.36874e+07	4.7203e+07	3.2715e+07	5.7016e+07	2.19084e+07	9.68271e+06	2.68847e+08	4.1508e+07	0	3.37173e+07	5.35701e+07
P24329	6.88198e+07	3.62929e+08	4.11477e+07	8.32954e+07	2.33386e+07	19103580	2.65873e+07	1.64677e+08	6.97711e+07	0	0	0
P24368	4.1086e+07	1.64023e+08	2.88678e+07	0	7.28329e+07	0	0	0	0	0	0	0
P24942	9.42294e+08	9.7778e+07	5.00568e+08	9.6327e+08	427868268	4.44232e+08	3.28458e+08	1.23306e+09	5.86742e+08	1.36452e+08	5.70448e+08	5.60574e+08
P25113	9.94185e+08	6.45964e+06	6.73389e+08	4.83784e+08	4.20036e+08	3.52337e+08	3.54513e+08	1.06601e+09	8.05931e+08	9.13942e+07	2.38934e+08	5.44753e+08
P26772	0	0	9.61179e+06	34530269	5.45524e+06	0	6.78508e+07	623860632	33406990	1.23287e+06	0	0
P27139	2.97265e+08	2.4364e+07	2.58119e+08	1.85846e+08	2.35721e+08	8.99661e+07	2.10483e+07	3.02465e+07	0	2.36118e+07	6.45841e+07	1.34045e+08
P28023	1.12058e+09	1.98277e+08	5.61045e+08	1.5471e+09	5.94295e+08	4.65933e+08	1.16348e+08	2.51365e+09	5.67948e+08	1.96704e+08	2.32509e+08	4.33203e+08
P28037	0	0	0	0	0	0	1.74592e+08	8.31118e+07	3.63333e+08	8.03971e+07	0	0
P28073	6.80796e+07	4.36745e+07	0	1.93044e+09	2.35954e+07	0	0	0	0	0	0	0
P28480	3.16429e+08	3.10277e+06	3.87588e+08	3.462e+07	0	2.46417e+07	0	6.42146e+08	1.78746e+08	0	1.54343e+08	2.92894e+08
P29101	1.88554e+08	1.63017e+07	2.60482e+08	5.46816e+08	1.13917e+08	9.83355e+07	1.11217e+08	1.12489e+09	5.3064e+08	2.64445e+09	0	0
P29147	0	0	0	0	0	0	0	0	0	0	4.95142e+08	7.05277e+06
P29266	125829815	2.91235e+07	1.95292e+08	0	2.83303e+07	0	0	2.8481e+08	1.97432e+08	8.20693e+07	0	0
P29419	1.56382e+08	1.44481e+07	264827085	63949082	5.20314e+07	0	0	0	0	0	1.18688e+08	1.32355e+08
P30009	0	0	0	0	0	0	0	0	0	0	9.87662e+07	1.12116e+08
P30835	2.5218e+08	1.10733e+08	5.18204e+08	4.0017e+08	1.31784e+08	1.5146e+08	1.08716e+08	7.73245e+08	457929973	1.04983e+08	0	0
P31000	6.20626e+08	4.14299e+07	3.5189e+08	0	3.66734e+08	0	0	0	0	0	0	0
P31044	3.63771e+08	1.59127e+08	1.55179e+08	2.95981e+08	1.41283e+08	3.72581e+08	8.52779e+07	3.68672e+08	3.48353e+08	4.35933e+07	1.76119e+08	2.15237e+08
P31421	0	0	0	0	0	1.14577e+08	3.42231e+07	8.69039e+07	1.15673e+08	7.1095e+07	4.05677e+07	4.65339e+07
P31596	0	0	0	0	0	6.15333e+08	9.84499e+08	0	0	4.17305e+08	0	0
P31647	0	0	4.4591e+07	1.57931e+08	3.4745e+07	1.30114e+08	4.66737e+07	3.04951e+08	0	3.54616e+07	6.85422e+06	3.39104e+07
P31662	1.35018e+08	1.97676e+08	1.90327e+08	3.4437e+08	6.53638e+07	2.51389e+07	6.71022e+06	7.36368e+08	6.73761e+07	6.20509e+06	0	0
P32551	3.49832e+08	8.59663e+06	3.16938e+08	3.3551e+08	3.60664e+08	2.05968e+08	1.40907e+08	5.21791e+08	3.08601e+08	0	2.35848e+08	3.37959e+08
P32736	1.50679e+08	1.01326e+09	1.0909e+08	1.81912e+08	1.29228e+08	1.22913e+08	5.87908e+07	2.27176e+08	1.4137e+08	2.37493e+07	9.7778e+07	175376436
P32851	3.70641e+08	2.64422e+07	2.48165e+08	0	2.16515e+08	2.63201e+08	4.81181e+08	7.13899e+08	2.73982e+08	0	2.11343e+08	3.57538e+08
P34058	1.25952e+09	5.94e+08	1.18961e+09	1.67005e+09	9.05659e+08	8.59148e+08	8.41765e+08	3.57084e+09	1.9973e+09	1.2925e+09	9.99816e+08	2314440401
P34926	0	0	0	0	0	7.8437e+08	0	1.266e+09	0	2.04986e+09	3.53535e+08	7.65696e+08
P35213	1.28015e+09	1.40667e+07	5.17047e+08	1.15835e+09	6.63259e+08	3.44017e+08	2.85544e+08	1.68761e+09	1.13608e+09	4.65689e+07	2.4424e+08	9.25099e+08
P35332	7.37502e+07	2.16567e+08	6.68725e+07	1.50682e+07	3.89045e+07	0	0	0	0	0	0	0
P35434	0	0	0	0	0	0	0	0	0	0	40247374	8.07393e+07
P35465	111097176	2.97346e+07	1.9506e+08	2.64142e+07	4.85812e+07	4.57625e+07	7.5938e+07	1.28685e+09	83154762	9.945e+06	2.00363e+07	6.25757e+07
P35565	0	0	0	0	0	1.90764e+08	0	1.42217e+09	4.89152e+08	2.68097e+08	0	0
P35704	2.11446e+08	5.07424e+08	1.81499e+08	1.53691e+08	5.93655e+07	5.21227e+07	2.45788e+07	4.18631e+07	1.87236e+08	0	1.2874e+07	1.3422e+08
P36201	2.58516e+07	8.38253e+07	3.41911e+07	0	1.16424e+07	1.00838e+06	0	2.26528e+08	1.48776e+07	0	0	0
P36876	7.2284e+07	2.39152e+07	3.27472e+07	0	1.56405e+07	0	1.08641e+08	5.60311e+08	4.37739e+07	0	0	0
P37805	9.72801e+07	3.89658e+06	3.66415e+07	4.36769e+08	4.89587e+07	1.39206e+07	2.09985e+07	3.90604e+08	7.14081e+07	0	1.08814e+07	3.15044e+07
P38650	0	0	0	0	0	4.71241e+08	4.56947e+08	1.92037e+09	3.56444e+08	2.99841e+08	1.87836e+08	9.55522e+08
P38652	2.14254e+08	1.29455e+08	7.46843e+07	0	9.19858e+07	5.76644e+07	0	0	1.34833e+08	1.22698e+08	0	0
P38983	3.47844e+07	1.11763e+08	4.40536e+07	0	4.06412e+07	1.83298e+07	1.32746e+07	0	28488189	0	0	0
P39069	6.94736e+07	2.25663e+06	1.11615e+08	8.04405e+07	2.08105e+07	0	9.17169e+06	2.68142e+07	4.24236e+07	0	1.28001e+08	4.50565e+07
P40307	0	0	2.10406e+07	3.58726e+06	1.01394e+07	0	0	0	0	0	0	0
P40329	0	0	0	0	0	5.16312e+06	4.85277e+06	3.77009e+07	7.49574e+07	0	0	0
P41498	7.35161e+07	3246379	7.31113e+06	4.77534e+06	0	0	0	0	0	0	693461	5.3512e+06
P41499	1.06408e+08	1.23965e+08	2.1114e+08	1.32681e+08	3.47895e+07	1.76233e+07	6.65922e+07	3.55542e+08	6.36598e+08	0	5.4096e+07	6.25564e+07
P41542	0	0	0	0	0	9.10806e+06	8.77776e+07	1.60041e+08	9.41823e+07	7.89918e+07	1.18297e+07	2.14013e+07
P41565	2.06735e+08	7.18037e+07	1.35592e+08	5.36994e+07	5.64691e+07	0	0	0	0	0	1.27438e+07	5.74749e+07
P42123	1.23443e+09	8.25456e+06	8.95261e+08	1.04636e+09	5.41915e+08	3.80373e+08	3.27491e+08	1.74277e+09	1.37348e+09	1.09856e+08	5.67001e+08	8.41481e+08
P43244	4.27581e+08	1.14828e+08	2.47483e+08	2.01961e+08	3.48725e+07	4.61108e+07	1.27246e+08	1.72476e+09	2.14112e+08	1.82022e+08	1.62206e+08	5.74758e+08
P45479	0	0	0	0	0	5.54684e+06	2.43754e+07	1.6516e+08	5.97157e+07	0	0	0
P45592	5.38994e+08	2.31937e+09	6.50661e+08	4.10598e+08	3.84355e+08	2.58429e+08	1.75373e+08	1.57931e+09	1.08507e+09	6.87874e+07	2.34491e+08	6.50782e+08
P46462	2.31833e+08	3.91047e+08	1.82711e+08	8.20544e+08	1.7074e+08	1.75083e+08	0	1.86547e+09	4.99226e+09	8.92357e+08	8.26442e+07	2.02073e+08
P47709	0	0	0	0	0	0	1.0339e+08	5.65529e+08	0	1.32057e+08	0	0
P47819	0	0	0	0	0	2.05952e+08	1.54559e+08	695577582	6.19788e+08	0	6.11836e+08	5.32992e+08
P47860	3.94307e+08	3.53535e+08	2.88306e+08	4.75034e+08	1.96143e+08	4.56316e+08	2.10174e+08	1.15957e+09	5.40664e+08	2.43511e+08	1.66913e+08	411600932
P47861	0	0	0	0	0	0	92767997	6.24442e+08	4.45461e+08	7.05051e+07	0	0
P47863	0	0	4.68169e+07	5.69088e+07	3.79905e+08	1.06473e+07	3.85833e+07	8.36257e+07	5.19473e+07	1.80653e+07	0	0
P47875	1.74793e+08	7.80384e+07	5.46558e+07	0	2.66414e+07	1.39284e+07	4.48026e+07	2.96262e+08	1.13779e+08	0	0	0
P47942	3.8356e+09	4.01499e+08	3.31098e+09	4.62255e+09	3.03977e+09	2.2348e+09	2.21606e+09	8.66878e+09	5.34857e+09	9.69015e+08	2.14758e+09	4.03668e+09
P47971	3.72187e+07	9.41554e+06	4.49969e+07	19392273	9.24768e+06	0	3.40823e+07	1.6844e+08	6.33819e+07	0	4.02468e+07	3.21099e+06
P48500	5.1486e+08	8.0693e+07	4.80232e+08	3.57224e+08	4.02932e+08	213533363	2.22089e+08	6.40121e+08	6.54669e+08	3.20393e+07	3.05395e+08	3.34821e+08
P48679	4.29591e+08	2.95572e+07	3.00459e+08	9.09014e+09	1.70765e+08	3.57487e+08	1.85401e+07	7.32879e+07	5.18056e+08	2.77716e+10	4.22122e+08	4.8085e+08
P48721	6.21251e+08	1.08039e+08	2.12174e+08	4.30752e+08	2.18076e+08	344793834	3.27091e+08	7.39456e+08	4.51946e+08	5.71726e+08	2.1308e+08	6.20971e+08
P48768	0	0	0	0	0	0	2.42711e+08	4.64451e+08	0	2.35977e+09	0	0
P49242	1.0401e+08	4.65712e+07	1.68352e+07	0	1.72115e+08	0	0	0	0	0	0	0
P49432	3.9728e+08	7.78462e+07	3.45715e+08	3.84912e+08	1.52573e+08	5.26101e+07	1.42755e+08	4.46804e+08	2.90134e+08	2.05697e+07	8.43648e+07	148946525
P49803	0	0	0	0	0	9.9483e+06	0	5.82034e+07	8.64268e+07	0	0	0
P50137	6.98698e+08	3.92905e+08	2.89133e+08	4.59222e+08	2.29819e+08	1.20836e+09	1.50852e+08	6.22138e+08	4.76545e+08	7.27961e+07	1.69502e+08	3.54355e+08
P50398	4.83067e+09	5.37487e+06	2.6749e+09	6.98541e+08	5.90216e+08	3.77345e+08	8.15259e+08	1.73964e+09	1.1327e+09	2.6891e+07	3.87766e+08	2.08754e+09
P50399	5.82291e+08	4.45387e+07	2.75994e+08	0	2.14253e+08	1.19669e+08	1.13834e+08	7.49148e+08	3.80462e+08	0	0	0
P50475	7.11316e+07	3.56247e+07	2.41126e+07	6.61334e+07	2.74348e+07	1.423e+08	2.31424e+07	2.54867e+08	3.75975e+08	30035233	0	0
P50503	0	0	7.34171e+07	3.95407e+07	1.50098e+07	0	0	0	0	0	0	0
P50554	0	0	0	0	0	1.95329e+07	0	2.00119e+08	1.46984e+08	0	0	0
P50878	2.58656e+07	2.52146e+07	5.11445e+08	3.28468e+08	0	4.27062e+08	1.15674e+08	1.51674e+09	7.18584e+07	0	0	0
P51635	5.50376e+07	24390780	4.45213e+07	4.64169e+07	5.53394e+07	3.2919e+07	3.84591e+07	5.97273e+07	3.66022e+07	0	7.92425e+06	2.41071e+07
P51799	0	0	0	0	0	0	5.60945e+07	0	5.10564e+08	6.7109e+08	0	0
P52296	9.36049e+07	9.95729e+07	5.56747e+07	6.55316e+07	3.98006e+07	4.46961e+07	5.07289e+07	1.82772e+08	1.02816e+08	5.17296e+07	6.45964e+06	4.62488e+07
P52303	3.64146e+08	8.16011e+07	3.54183e+08	3.85795e+08	1.55352e+08	0	0	0	0	0	0	0
P52481	1.10962e+08	4.94364e+07	9.79152e+07	7.90419e+07	6.20314e+07	3.35416e+07	1.56937e+08	1.73389e+08	1.51907e+08	0	7.16186e+07	9.6082e+07
P52873	1.23399e+08	7.82463e+06	6.96417e+07	3.7829e+08	6.84243e+07	7.81805e+07	8.71829e+07	3.75568e+08	1.89956e+08	3.01437e+08	1.47502e+08	1.83188e+08
P53678	2.13343e+07	2.52511e+09	1.60701e+07	0	2.50602e+07	0	0	0	0	0	0	0
P54311	1.01499e+09	3.03792e+07	8.08899e+08	7.87754e+08	6.59198e+08	2.59672e+08	2.77823e+08	9.82365e+08	6.48886e+08	6.48124e+07	4.39609e+08	783180971
P54313	1.01499e+09	4.22122e+08	7.35226e+08	7.87754e+08	5.91225e+08	2.08378e+08	2.77823e+08	9.40851e+08	6.48886e+08	0	4.39609e+08	783180971
P54319	4.37723e+08	1.51077e+08	5.59174e+08	1.04205e+07	2.07658e+07	2.00115e+08	2.03465e+08	8.99935e+07	1.26049e+08	8.58165e+07	7.88795e+07	6.69326e+07
P54921	9.51835e+07	5.35314e+07	9.28068e+07	9.66091e+07	1.01882e+08	5.50636e+07	4.40651e+06	6.17739e+08	5.17321e+08	0	7.80744e+07	4.59099e+08
P55053	0	0	1.6366e+08	1.65763e+08	1.48839e+08	1.78877e+08	0	1.10927e+07	3.9711e+07	0	0	0
P55067	0	0	2.16326e+08	3.89554e+09	7.32492e+08	5.49973e+08	5.58229e+08	3.17263e+09	0	5.08387e+08	4.13382e+08	5.83992e+08
P55068	5.43419e+08	1.1213e+07	4.03824e+08	5.61264e+08	1.35137e+08	3.26353e+08	1.45463e+08	1.27244e+09	7.80902e+08	3.06359e+08	1.17409e+08	4.1332e+08
P55161	0	0	4.12543e+07	7.36152e+07	7.44031e+07	7.02835e+07	8.43825e+07	1.7485e+08	1.67372e+08	5.08693e+07	0	0
P56536	0	0	0	0	0	0	1.30556e+08	1.44299e+07	1.44909e+07	0	0	0
P56558	4.14963e+07	1.54498e+08	2.92631e+07	1.09898e+09	5.5344e+07	2.53047e+07	3.17545e+07	4.1829e+08	5.69108e+08	8.49898e+07	2.3831e+07	8.53579e+07
P56571	3.47228e+08	8.64152e+06	7.96773e+07	8.01797e+07	9.75883e+07	3.91402e+07	4.95393e+07	2.21535e+08	1.75904e+08	9.78568e+06	3.40938e+07	1.65717e+08
P56574	805448596	4.83802e+07	6.35671e+07	0	1.28053e+08	2.63669e+07	3.87345e+07	3.42625e+08	334802780	0	1.01143e+08	1.87273e+08
P56603	4.50693e+07	2.64507e+08	6.43661e+07	7.09934e+07	0	0	1.24874e+07	4.42397e+07	4.67157e+07	0	0	0
P59215	0	0	1.59849e+09	2277136737	1.30841e+09	1.20282e+09	7.10972e+08	0	2.53355e+09	3.16653e+08	8.43547e+08	1866743792
P60203	7.72185e+09	8.16909e+07	4.26345e+09	5.18552e+09	3.37306e+09	4.3872e+09	1.83807e+09	1.73298e+10	1.21645e+10	1.84258e+09	1.73454e+09	5.80547e+09
P60711	0	0	8.66713e+09	1.37677e+10	7.10821e+09	4.81174e+09	3.17841e+09	0	7.53921e+09	0	5.44358e+09	6.87641e+09
P60881	2.875e+08	7.16186e+07	1.77919e+08	359262377	1.30796e+08	4.00623e+08	1.0998e+08	6.43233e+08	2.78081e+08	1.08793e+08	1.30757e+08	1.7746e+08
P60892	4.41037e+07	1.47502e+08	3.00055e+07	0	3.04082e+07	1.83097e+07	9.94798e+06	5.21194e+06	3.1265e+07	0	0	0
P60905	2.75126e+08	1.12756e+07	2.22808e+08	1.06276e+08	7.54223e+07	1.4349e+08	9.54235e+07	2.72273e+08	2.47687e+08	0	1.08159e+08	1.37713e+08
P61206	0	0	0	0	0	1.79721e+08	0	8.01106e+08	5.11261e+08	0	0	0
P61265	7.01424e+08	5.96394e+07	4.71857e+08	8.44029e+08	3.11751e+08	3.2456e+08	2.41047e+08	1.81926e+09	1.04456e+09	3.2158e+08	3.14074e+08	7.49812e+08
P61589	0	0	0	0	0	9.60102e+07	0	4.85824e+08	2.43686e+07	0	0	0
P61765	1.98642e+09	7.55469e+07	1.42261e+09	1.67799e+09	1.09375e+09	7.27563e+08	9.48188e+08	3.66167e+09	1.63884e+09	2.98464e+08	1.01326e+09	1.40116e+09
P61980	2.00883e+08	5.58151e+07	3.01502e+08	1.84657e+08	1.11202e+08	1.20658e+08	1.58213e+08	1.07926e+09	1.55492e+08	2.4419e+08	7.67185e+07	2.11081e+08
P61983	1.38306e+09	1.41432e+09	7.36159e+08	1.48115e+09	8.03115e+08	4.85202e+08	2.07001e+09	2.01409e+09	1.35162e+09	4.88143e+08	2.65623e+08	1.20014e+09
P62138	8.14142e+07	1.45932e+07	4.25026e+07	4.55363e+07	1.05377e+08	5.57709e+07	3.65266e+07	1.03335e+09	9.93038e+07	0	2.35038e+07	6.02198e+07
P62193	0	0	1.90146e+07	4.79297e+07	7.71217e+07	0	0	0	0	0	0	0
P62198	1.03589e+08	480117695	1.33743e+08	1.74267e+08	6.41908e+07	0	0	0	0	0	0	0
P62250	3.0841e+07	3.57219e+07	1.63792e+07	8.63019e+06	0	0	5.68654e+06	1.07515e+07	1.2658e+07	0	4.02531e+07	2.65406e+06
P62260	1.56288e+09	2.05481e+07	6.33304e+08	1.24814e+09	7.05103e+08	7.22837e+08	4.71808e+08	1.78341e+09	1.21286e+09	8.09038e+07	4.01499e+08	1.03207e+09
P62278	4.36435e+07	1.05399e+07	4.92162e+06	4.3785e+06	1.11058e+07	0	4.72479e+06	3.75616e+08	14731146	0	0	0
P62632	3.22274e+10	4.37025e+07	2.35258e+10	5.4643e+10	4.29983e+08	2.24475e+10	220174364	5.56175e+10	9.37071e+08	3.4586e+10	0	0
P62703	0	0	1.37528e+07	1.21612e+08	3.91519e+06	0	0	0	0	0	0	0
P62744	4.35126e+07	3.11948e+08	2.50916e+07	6.37069e+07	2.99499e+07	0	0	0	0	0	0	0
P62747	4.70612e+07	2.45806e+07	3.03034e+07	0	2.34724e+07	0	0	0	0	0	0	0
P62762	1.10715e+08	3.41998e+07	4.3058e+08	5.40185e+09	1.34717e+08	0	7.81589e+07	3.76324e+08	1.67455e+08	5.13074e+07	0	0
P62775	0	0	0	0	0	2.59812e+07	1.32201e+07	0	9.85527e+07	0	0	0
P62804	3.30959e+08	3.96763e+07	2.70187e+08	6.62904e+08	1.95933e+08	1.85901e+08	1.12702e+08	6.01863e+08	4.17894e+08	0	6.10103e+07	4.09569e+08
P62815	9.44156e+08	5.17148e+07	5.25622e+08	5.74967e+08	4.33851e+08	3.11321e+08	2.45792e+08	1.41967e+09	8.25212e+08	3.55718e+07	3.14233e+08	5.4375e+08
P62824	7.04631e+08	1.13297e+09	552469916	7.24125e+08	5.58715e+08	0	1.33526e+08	1.09875e+09	571950534	1.00276e+08	0	0
P62828	1.19496e+08	2.24896e+08	9.83157e+07	5.40635e+07	8.66947e+07	35004796	1.55502e+07	2.24179e+08	4.05418e+09	0	1.41382e+09	1.29169e+08
P62882	0	0	0	0	0	1.2464e+08	1.08732e+08	6.0617e+07	5.33959e+07	0	1.57427e+08	5.57929e+07
P62909	3.38362e+07	4.1238e+07	5.04553e+08	1.14866e+08	2.42594e+08	0	7.99762e+07	0	1.63442e+08	0	0	0
P62944	4.66818e+08	3.39696e+07	4.29001e+08	4.46293e+08	2.192e+08	2.64366e+08	2.63257e+08	1.25797e+09	6.90514e+08	3.03538e+08	1.29291e+08	6.47848e+08
P62963	4.28293e+07	9.02549e+07	5.05665e+07	4.97199e+07	4.56934e+07	1.20711e+08	2.98444e+07	4.14698e+07	3.48891e+06	0	1.39368e+07	1.34702e+07
P62994	3.75185e+08	2.41463e+07	1.76364e+07	0	9.87603e+06	0	0	0	0	0	0	0
P63004	7.81425e+07	4.03153e+09	1.06646e+08	1.08561e+08	6.56589e+07	1.69712e+07	3.97567e+07	5.30428e+08	7.7365e+07	0	44125630	1.18528e+08
P63012	9.57724e+08	4.03168e+07	7.33872e+08	1.05939e+09	5.24097e+08	2.5767e+08	2.40963e+08	1.7391e+09	8.69674e+08	9.79668e+07	2.24896e+08	7.99483e+08
P63018	2.38214e+09	1.76717e+08	1.94739e+09	3.89081e+09	1.68072e+09	1.97174e+09	1.56661e+09	6.7741e+09	4.03518e+09	1.11552e+09	1212161947	2.78447e+09
P63029	7.38767e+07	2.87396e+08	3.16735e+07	4.84419e+07	3.0918e+07	0	1.20775e+07	4.83254e+09	4.01041e+07	0	9.28886e+06	2.65543e+07
P63036	0	0	1.39365e+08	9.42625e+07	1.41488e+07	2.40696e+08	0	3.10692e+07	8.68017e+07	0	0	0
P63039	4.81264e+08	1.60635e+08	2.98926e+08	5.51989e+08	2.45522e+08	2.22689e+08	2.19198e+08	1.11204e+09	5.24435e+08	5.57647e+07	1.73425e+08	3.77814e+08
P63047	0	0	0	0	0	7.86427e+06	0	9.86666e+07	3.00906e+08	0	0	0
P63081	1.63247e+08	7.17497e+07	0	229786946	7.19614e+07	1.06512e+07	6.55129e+07	811281613	1.68743e+08	3.35971e+07	0	0
P63086	1.894e+08	1.62206e+08	8.27904e+07	1.2898e+08	1.07849e+08	8.4801e+07	6.04982e+07	1.9599e+08	2.1176e+08	2.93282e+07	2.17243e+08	4.69151e+08
P63100	2.6378e+07	1.84658e+08	4.88333e+06	0	1.47609e+07	0	0	0	0	0	0	0
P63102	2.53157e+09	7.18179e+07	1.33322e+09	2.40771e+09	1.44862e+09	7.51857e+08	7.05496e+08	2.53118e+09	2.13285e+09	2.45554e+08	1.06757e+09	1893210719
P63142	3.60483e+07	1.6723e+07	1.44756e+07	2.97283e+07	0	2.99393e+07	1.54602e+07	96256433	3.13774e+07	0	0	0
P63170	5.19126e+07	7.11755e+07	9.41086e+07	77839630	5.68874e+07	0	0	0	0	0	0	0
P63245	8.90886e+07	2.96595e+07	1.92002e+07	0	2.14597e+07	0	0	0	0	0	0	0
P63319	6.34758e+08	5.41425e+07	3.83344e+08	2.02566e+08	7.63515e+07	1.16909e+08	6.03853e+07	8.99732e+08	3.09982e+08	7.46751e+07	2.48142e+08	2.41408e+08
P63322	9.82832e+07	6.25714e+07	6.47194e+07	1.24587e+08	2.07584e+08	4.28834e+07	2.28467e+07	1.54896e+08	1.0595e+08	5.34066e+06	7.31432e+07	1.6596e+08
P63331	0	0	0	0	0	0	0	0	0	0	5.24714e+07	4.40499e+07
P67779	9.78966e+07	1.99597e+07	7.28751e+07	6.53794e+07	6.68647e+07	0	2.26276e+07	8.51816e+07	7.69146e+07	0	4.28416e+07	1.31759e+07
P68035	8.67932e+09	2.74326e+07	5.64187e+09	9.73477e+09	0	0	0	0	0	0	3.70371e+09	4.23463e+09
P68136	0	0	0	0	0	3.14717e+09	0	1.25747e+10	0	5.34762e+08	0	0
P68182	4.1522e+07	2.14758e+09	1.77608e+08	2.48735e+08	1.0169e+08	9.8724e+07	1.96361e+08	5.51068e+08	6.54827e+07	0	3.89658e+06	5.11354e+08
P68255	1.1537e+09	1.20955e+08	4.92123e+08	0	6.75024e+08	3.42526e+08	2.82901e+08	2.86495e+10	1.0693e+09	0	0	0
P68370	1.38896e+10	2.44163e+07	1.00254e+10	1.35131e+10	8.2847e+09	8.30439e+09	4.82762e+09	0	1.74302e+10	1.73137e+09	5.43741e+09	1.3451e+10
P68511	1.2675e+09	1.26792e+09	4.81627e+08	1.3889e+09	7.59235e+08	4.42266e+08	2.35284e+08	1.91878e+09	1.32578e+09	4.00095e+07	2.19663e+08	1.09512e+09
P69682	4.53251e+07	1.60523e+08	4.96006e+07	1.31137e+08	5.00514e+07	29614972	1.86612e+07	5.91779e+07	7.09035e+07	0	0	0
P69897	1.02068e+10	3.67407e+08	7.95806e+09	8.95729e+09	5.06363e+09	4.15355e+09	3.81507e+09	1.76806e+10	8.18536e+09	7.45366e+08	4.03153e+09	5.84636e+09
P70483	2.88715e+07	379506711	7.83424e+07	0	8.46208e+07	1.6354e+08	0	1.74385e+08	7.09911e+07	0	4.28071e+07	4.5823e+07
P70500	0	0	0	0	0	1.66617e+07	0	5.07894e+07	69635687	0	0	0
P70566	5.51067e+07	3.47804e+07	8.44542e+07	8.75453e+07	2.31237e+07	4.34463e+07	15357876	6.44398e+07	1.06177e+08	0	0	0
P70580	1.61796e+08	41298933	1.39408e+08	0	3.07331e+06	1.20185e+07	0	1.41661e+09	748232	0	5.92477e+06	6.34798e+06
P70600	4.07875e+08	4.52572e+08	7.34036e+07	1.46056e+09	7.57111e+07	9.69844e+07	2.83641e+07	4.18803e+08	1.32748e+09	5.37048e+08	6.39207e+07	1.2429e+08
P70615	4.95633e+07	3.81863e+07	1.02583e+08	2.89837e+08	1.18929e+08	0	771603805	1.32333e+08	1.48692e+08	0	0	0
P70627	0	0	0	0	0	6.35547e+07	4.08104e+07	0	2.62506e+07	9.65461e+07	0	0
P80254	9.57506e+07	0	3.78174e+07	2.87466e+07	3.29362e+07	4.1928e+07	0	2.71004e+08	1.08442e+08	0	12349581	100553820
P81155	5.74226e+08	2.976e+07	3.77866e+08	3.83085e+08	4.45811e+08	0	0	8.87396e+08	4.65106e+08	4.09379e+07	1.41827e+08	6.43843e+08
P81795	2.75818e+06	3.99588e+08	1.22548e+07	0	3.415e+07	0	0	0	0	0	0	0
P82471	6.056e+07	4.86696e+07	2.61066e+07	2.24805e+07	2.90006e+07	2.64757e+07	1.56493e+07	6.82011e+07	6.15326e+07	0	1.8292e+07	3.77879e+07
P82995	9.8068e+08	6.42257e+08	9.86931e+08	1.73197e+09	9.10308e+08	8.7863e+08	8.41765e+08	3.5356e+09	2.10837e+09	1.2925e+09	1010252013	2.34797e+09
P84076	0	0	0	0	0	0	9.42946e+06	4.381e+08	2.84896e+08	2.16121e+08	0	0
P84083	2.42252e+08	1.79202e+07	1.85499e+08	2.4456e+08	1.4289e+08	0	0	0	0	0	0	0
P85108	1.02068e+10	1.59127e+08	7.95806e+09	8.95729e+09	0	4.15355e+09	3.81507e+09	1.68448e+10	8.18536e+09	7.45366e+08	4.03153e+09	5.84636e+09
P85125	4.2709e+07	1.64751e+08	1.59879e+07	0	2.22689e+07	0	0	0	0	0	0	0
P85515	1.55431e+08	8.34748e+07	1.01415e+08	4.46608e+07	4.87192e+07	3.88569e+07	3.55686e+07	5.04406e+07	6.3698e+07	0	2.08684e+07	4.73302e+07
P85834	1.17135e+08	1.06469e+09	1.48998e+08	0	1.29141e+08	4.40714e+07	5.82038e+07	1.56003e+08	1.41551e+08	1.45969e+07	2.18668e+07	85206871
P85845	3.09285e+08	1.55435e+08	2.76612e+08	2.34057e+08	1.84263e+08	2.74504e+08	9.92432e+07	5.28098e+08	3.90158e+08	6.36225e+06	1.64751e+08	2.57687e+08
P85969	5.50455e+08	5.20821e+08	1.62892e+08	157969070	1.55389e+08	6.7154e+07	1.90913e+08	2.46607e+08	2.19519e+08	2.72972e+07	1.36045e+08	217702236
P85972	3.83468e+08	1.28666e+06	288771412	8.65433e+07	3.72666e+08	1.79361e+08	0	2.43362e+08	5.45575e+07	1.54901e+08	3.97716e+07	9.36639e+07
P85973	134854109	7.03602e+06	3.81291e+07	100840374	13589121	0	0	0	0	0	0	0
P86182	0	0	0	0	0	7.95486e+07	1.53096e+07	3.05874e+07	1.62869e+08	7.96405e+07	0	0
P97536	3.70943e+08	3.8414e+07	1.31335e+08	1.91093e+08	2.25442e+08	7.30814e+07	1.19619e+08	3.33121e+08	2.03188e+08	0	2.74326e+07	2.12511e+08
P97546	4.1324e+08	3.70643e+08	3.84331e+08	5.00256e+08	2.08019e+08	1.71837e+08	1.47607e+08	1.08375e+09	5.77326e+08	0	1.33126e+08	4.18898e+08
P97595	5.76463e+07	5.74035e+07	2.87348e+08	94125928	2.56498e+07	0	0	0	0	0	0	0
P97680	0	0	0	0	0	3.1867e+07	1.17911e+07	0	7.12739e+07	0	0	0
P97685	3.17524e+08	1.17409e+08	2.39273e+08	5.65027e+08	1.8637e+08	3.13167e+08	2.59059e+08	1.48106e+09	8.85658e+08	3.9132e+08	1.87825e+08	6.38979e+08
P97700	6.16427e+07	2.35653e+08	7.86125e+07	9.33169e+07	8.85499e+07	1.4821e+08	2.85215e+07	1.25498e+08	1.40413e+08	0	5.52174e+07	9.47813e+07
P97710	2.24365e+08	4.35918e+07	1.89857e+08	1.56813e+08	1.37544e+08	2.31437e+08	2.7766e+08	3.47104e+08	3.75884e+08	2.15886e+08	1.51077e+08	2.93224e+08
P97834	1.93232e+08	4.81776e+07	1.11699e+07	0	2.03244e+07	0	0	0	0	0	0	0
P97838	8.84653e+07	19378595	1.68358e+08	1.87413e+08	8.86373e+07	1.53205e+07	8.3237e+07	6.62931e+08	1.30161e+08	4.92457e+07	3.47804e+07	8.03968e+07
P97852	4.49445e+08	5.29583e+08	0	1.95581e+08	1.29669e+08	0	0	1.99604e+08	1.55286e+08	5.90192e+08	0	0
Q00981	6.66904e+08	2.62221e+06	6.34882e+08	7.62748e+08	4.74181e+08	2.03059e+08	2.27792e+08	1.09883e+09	4.42082e+08	1.04193e+08	2.03572e+08	6.45793e+08
Q01205	0	0	0	0	0	4.60323e+07	0	5.01707e+08	0	5.3998e+08	0	0
Q01728	2.41899e+08	12349581	9.5264e+08	3.58184e+08	3.40035e+08	7.98316e+08	0	4.68085e+08	2.16407e+08	2.22333e+09	0	0
Q01986	5.46035e+07	4.53931e+07	1.59751e+08	0	6.75035e+07	0	0	0	0	0	2.42151e+07	1.04428e+08
Q02253	5.44104e+07	1.03649e+08	3.09466e+07	0	3.80052e+07	3.73292e+07	2.93553e+07	668204601	3.09986e+07	1.23695e+08	2.03593e+07	4.53406e+07
Q02356	3.78869e+08	2.8014e+07	8.59381e+06	1.8534e+07	0	0	0	0	0	0	0	0
Q02563	3.15506e+08	2.56406e+08	2.46335e+08	9.06724e+08	1.56513e+08	2.3048e+08	2.19392e+08	8.94341e+08	432146092	0	2.19662e+08	4.83104e+08
Q03555	2.72679e+08	2.49245e+06	3.27177e+08	6.12102e+07	0	2.64375e+08	7.65569e+07	1.24033e+09	0	2.72507e+08	3.49876e+07	2.39881e+08
Q04462	3.13362e+08	9.96709e+06	7.35647e+07	2.26024e+08	8.14347e+07	2.75209e+07	2.28524e+07	6.70699e+08	8.53993e+07	2.44305e+08	2.38249e+07	1.39807e+08
Q04931	1.08174e+08	3.95417e+08	2.46799e+08	4.81817e+07	2.46531e+07	5.69776e+07	2.43086e+07	507693593	3.42023e+07	0	0	0
Q05683	3.80319e+08	8.40807e+07	5.79868e+07	6.54041e+07	3.86483e+07	3.2936e+07	5.49675e+07	1.97293e+08	4.4829e+07	1.04632e+08	4.26819e+07	5.66782e+07
Q05764	1.33382e+08	1.69015e+08	1.00804e+08	2.36225e+08	1.09632e+08	135384383	1.23061e+08	9.78875e+08	3.78128e+08	173674950	1.36523e+08	2.20227e+08
Q05962	1.79596e+09	9.98761e+07	9.97699e+08	1.04933e+09	7.40454e+08	4.7718e+08	7.00818e+08	1.7088e+09	1.48892e+09	1.38402e+08	4.19181e+08	8.95145e+08
Q05982	3.31745e+08	2.77635e+08	2.04594e+08	3.25958e+08	2.07108e+08	0	0	0	0	0	0	0
Q05BA4	0	0	0	0	0	0	0	0	0	0	2.84174e+07	9.30112e+07
Q06647	2.44012e+08	8.44704e+07	1.2135e+08	1.70933e+08	89912956	7.46851e+07	5.47778e+07	2.71852e+08	1.81403e+08	2.69877e+07	2.19179e+07	1.29062e+08
Q07009	1.65095e+08	1.13403e+08	8.93711e+07	5.00643e+07	1.58063e+08	0	1.84017e+07	2.223e+08	1.03169e+08	1.00247e+08	0	0
Q07266	1.60435e+08	1.5195e+07	1.92114e+08	4.42223e+08	2.39347e+08	0	1.34288e+08	7.52266e+08	5.15612e+08	3.46727e+08	1.01377e+08	3.5958e+08
Q07647	4.62629e+07	1.56721e+08	4.29715e+07	0	2.73773e+07	3.80498e+07	1.7655e+07	2.29201e+08	1.03003e+08	16430018	0	0
Q08163	4.26311e+08	5.17628e+06	1.55693e+08	1.4116e+08	1.885e+08	2.47647e+07	2.21034e+08	3.6605e+08	3.01225e+08	6.67927e+06	1.18951e+08	1.94962e+08
Q08406	0	0	1.2403e+07	0	8.43989e+06	9.89372e+06	6.83255e+06	0	2.44108e+07	0	2.3253e+06	8.68701e+06
Q09073	1.79596e+09	8.75112e+07	9.39597e+08	9.0728e+08	7.22484e+08	4.02731e+08	7.00818e+08	1.7088e+09	1.41195e+09	1.11513e+08	4.25266e+08	8.0655e+08
Q0QER8	3.06759e+07	7.01648e+07	1.87323e+07	2.6539e+08	0	0	0	0	0	0	0	0
Q1RP74	0	0	0	0	0	1.4034e+07	0	7.19981e+07	8.30919e+07	0	1.23595e+07	1.35336e+07
Q1WIM3	1.36738e+08	6.29169e+07	1.06851e+08	1.26287e+08	1.01724e+08	56985897	6.31227e+07	5.4038e+08	1.70036e+08	0	3.93742e+07	1.15471e+08
Q2I6B2	6.48356e+08	1.17071e+07	4.85979e+08	1.05875e+09	2.97736e+08	0	4.29283e+08	2.086e+09	1.08194e+09	0	4.15842e+08	3.51003e+08
Q2IBD4	3.21757e+08	6.20984e+06	1.98661e+08	6.22976e+08	5.03519e+07	1.67044e+08	5.77751e+07	4.25955e+08	3.16719e+08	2.99787e+08	0	0
Q2PQA9	0	0	0	0	0	1.10197e+09	0	4.33497e+08	0	3.29294e+08	0	0
Q32PX6	0	0	1.6312e+07	11675177	5.87777e+06	1.32428e+07	1.29548e+07	6.7923e+07	4.4553e+07	0	6.0942e+06	1.57202e+08
Q38PG0	0	0	0	0	0	7.4696e+06	2.33729e+09	605430675	0	0	0	0
Q3B8P6	2.296e+07	2.21139e+07	4.21483e+07	1.8459e+07	4.85187e+06	0	1.58812e+08	1.52185e+07	2.31091e+07	0	0	0
Q3B8Q0	0	0	0	0	0	7.26044e+07	0	2.11541e+07	4.20679e+07	0	0	0
Q3KRE8	1.02068e+10	4.25266e+08	7.95806e+09	8.95729e+09	5.06363e+09	4.15355e+09	3.81507e+09	1.68448e+10	8.18536e+09	0	4.03153e+09	5.84636e+09
Q3KRF2	4.64032e+07	2.72383e+07	3.83784e+07	0	1.61704e+07	4.658e+07	0	1.33387e+09	1.54382e+08	7.64078e+07	0	0
Q3MHS9	2.0633e+08	4.85761e+07	5.88905e+07	2.33289e+08	5.47074e+07	1.05392e+08	0	9.46788e+07	1.98199e+08	0	0	0
Q3MID5	137328262	2.64128e+08	9.38962e+07	0	4.19106e+07	6.27161e+07	0	6.77897e+08	0	3.82716e+07	0	0
Q3MIE4	0	0	2.80493e+07	9.65569e+07	1.12447e+07	3.57958e+07	7.26356e+07	2.1543e+08	62135591	5.57258e+07	1.20955e+08	3.80674e+07
Q3T1I4	0	0	0	0	0	0	0	1.94131e+08	6.73846e+07	1.93525e+07	0	0
Q3T1K5	1.17141e+08	6.65745e+08	1.21621e+08	5.9953e+07	6.69884e+07	1.67621e+07	3.07997e+07	149371251	3.67697e+07	0	4.90728e+07	3.46776e+07
Q3ZBA0	3.0711e+08	198436159	2.62441e+07	2.4801e+08	3.83451e+07	5.90128e+07	1.06666e+08	5.51333e+08	9.22344e+07	1.02958e+08	7.65239e+06	3.87549e+08
Q498D4	0	0	0	0	0	0	6.26685e+07	711679915	1.33705e+08	8.8164e+07	0	0
Q499N5	2.57163e+07	6.63388e+07	5.84307e+07	1.69919e+08	1.35491e+07	9.32213e+06	4.65697e+06	5.44717e+08	1.69993e+07	0	8.75112e+07	8.63667e+07
Q499P2	6.93929e+07	6.37663e+07	1.45035e+08	1.55779e+08	3.57472e+07	0	0	0	0	0	0	0
Q499R1	0	0	0	0	0	0	0	1.0303e+09	4735972390	2.27858e+07	0	0
Q4FZT2	7.54457e+06	1.18297e+07	1.20472e+07	2.97561e+07	6.16313e+06	6.24925e+06	1.06033e+07	1.64588e+07	6.47513e+06	0	7.53785e+06	1.87557e+07
Q4FZT9	2.54666e+07	4.5162e+07	2.0729e+07	4.27912e+07	1.15121e+08	1.81174e+07	1.90192e+07	1.00509e+08	2.75838e+08	2.33357e+08	1.33088e+07	3.89908e+07
Q4FZU2	7.73978e+08	1.19384e+07	9.67642e+07	1.37765e+09	1.95564e+08	2.19039e+08	0	5.87927e+08	5.03422e+08	1.22026e+08	5.6448e+08	6.11414e+08
Q4FZY0	0	0	0	0	0	6.76208e+07	1.35408e+08	0	2.97821e+08	0	0	0
Q4G079	1.85406e+08	7.38924e+07	1.66958e+08	0	5.30095e+06	0	0	0	0	0	0	0
Q4KLH4	0	0	0	0	0	0	3.79054e+07	3.04472e+07	2.93093e+08	0	0	0
Q4KM49	0	0	0	0	0	4.92319e+07	1.55041e+07	0	7.53098e+07	0	0	0
Q4KM71	0	0	6.04382e+07	3.53472e+08	1.58804e+08	54726391	4.4571e+07	7.2472e+08	0	1.11995e+08	0	0
Q4KM73	5.36105e+07	5.39335e+08	1.88539e+07	0	4.04094e+07	0	0	0	0	0	0	0
Q4KM74	9.03293e+07	1.37165e+09	7.97523e+06	0	1.50458e+08	0	0	0	0	0	0	0
Q4KSH6	0	0	6.25018e+08	1.01338e+09	1.55808e+08	0	0	0	0	0	0	0
Q4QQT7	0	0	0	0	0	1.01194e+07	0	3.74006e+08	330963566	5.2642e+08	0	0
Q4QRB4	8.98062e+09	2.19662e+08	6.27215e+09	8.95729e+09	5.06363e+09	3.81388e+09	2.93015e+09	1.38941e+10	7.82898e+09	7.45366e+08	3.84555e+09	5.84636e+09
Q4V7D2	2.52018e+07	1.54349e+08	2.40613e+07	0	1.61255e+08	0	0	0	0	0	0	0
Q4V8B0	1.24732e+09	3.80363e+07	5.65613e+08	5.05116e+08	1.26341e+08	7.66394e+07	2.15408e+08	8.905e+08	4.37206e+08	2.19122e+08	6.44007e+07	1.45972e+08
Q4V8C1	2.24791e+10	1.87223e+07	9.98805e+09	4.1792e+10	2.12634e+10	3.63914e+10	0	1.86814e+10	2.23771e+10	1.3137e+10	1.46681e+10	1.23569e+10
Q4V8I6	0	0	0	0	0	4.0755e+07	0	754508258	9.57355e+07	0	0	0
Q52KK2	9.81214e+06	1.44433e+07	1.03216e+07	0	7.93803e+06	2.773e+07	3.40386e+06	1.5275e+08	1.92235e+07	0	0	0
Q52KS1	4.06358e+08	3.10602e+07	2.62591e+08	4.97368e+08	1.93246e+08	3.9248e+08	2.12576e+08	9.03644e+08	5.27274e+08	1.70432e+09	1.92392e+08	3.53476e+08
Q561S0	5.31232e+08	8.15232e+07	1.39159e+08	2.40189e+08	7.11236e+07	4.04152e+07	2.89114e+07	6.10448e+08	249462305	0	5.17148e+07	1.18331e+08
Q562A6	2.12653e+07	5.92341e+07	2.42771e+08	0	1.86342e+07	3.3493e+06	1.65938e+06	5.91655e+07	3.2334e+07	0	0	0
Q566E4	1.1858e+08	1.87836e+08	3.44487e+07	0	4.09341e+07	0	8.94561e+07	4.71562e+08	0	2.8515e+08	0	0
Q568Z9	5.86262e+07	1.45232e+08	7.26356e+07	1.51435e+08	5.9565e+07	3.23761e+07	3.19407e+07	0	6.67106e+07	0	2.80226e+07	6.03548e+07
Q5BJT9	1.23833e+09	2.56259e+08	7.53545e+08	5.4083e+08	5.09209e+08	4.65235e+08	3.50481e+08	1.18381e+09	1.05754e+09	4.0449e+07	3.49623e+08	8.00182e+08
Q5BJU7	3.81502e+07	1.7646e+08	3.3049e+07	154091709	3.68296e+07	66686593	1.64111e+07	1.65293e+08	1.43455e+08	2.84256e+07	1.6723e+07	6.7632e+07
Q5BJZ3	0	0	0	0	0	2.28204e+07	2.15291e+07	8.78039e+08	5.62887e+07	0	3.94713e+06	7.74772e+07
Q5BK63	1.5849e+09	1.50578e+08	1.89886e+08	6.13392e+07	4.46507e+07	5.29009e+07	1.13794e+09	8.80102e+08	1.00292e+08	0	1.05746e+08	6.24355e+07
Q5BKC3	1.57104e+08	2.66453e+07	0	1.95565e+08	5.20525e+07	0	0	0	0	0	0	0
Q5BKC9	3.99417e+07	1.08274e+08	8.18676e+07	1.80718e+08	0	3.58635e+07	6.9942e+06	6.94812e+07	1.96658e+08	0	0	0
Q5EB55	0	0	0	0	0	3.71085e+07	6.56985e+07	1.99802e+08	0	0	0	0
Q5EB62	2.56007e+07	1.94552e+06	0	622217308	1.48947e+07	0	0	0	0	0	0	0
Q5EB77	1.0072e+08	6.55054e+07	1.6517e+07	0	3.36816e+07	0	0	0	0	0	4.75214e+06	9031405
Q5EBA4	0	0	0	0	0	4.17011e+07	4.28647e+07	173844059	5.97217e+07	0	3.28326e+07	1.25112e+08
Q5FVC2	3.26112e+08	1.27981e+07	1.24741e+08	1.07498e+08	3.90809e+07	3.40272e+08	3.74968e+08	7.67013e+08	2.33877e+08	3.3191e+08	5.58128e+07	7.80255e+08
Q5FVI4	0	0	0	0	0	81744169	4.89903e+07	4.75682e+07	5.49673e+07	0	4.25129e+07	6.88181e+07
Q5FVI6	6.50598e+07	5.50241e+07	1.4874e+08	7.17992e+07	5.59423e+07	3.61684e+07	3.52641e+07	1.19181e+08	58759408	0	1.307e+07	1.17997e+08
Q5FVM4	3.47673e+07	1.70674e+08	5.5542e+07	0	3.41167e+07	0	0	0	0	0	0	0
Q5GFD9	2.29057e+08	1.62946e+08	4.82014e+07	3.34623e+08	7.19316e+07	5.8986e+07	3.32129e+07	1.77605e+08	1.05596e+08	0	7.70197e+07	1.91419e+08
Q5HZA6	0	0	0	0	0	0	0	0	0	0	1.59213e+08	4.28112e+08
Q5HZV9	2401044350	8.58548e+06	1.28699e+08	2.57361e+09	3.67619e+08	6.76461e+08	1.39053e+07	8.77104e+07	9.98598e+07	0	1.19769e+08	3.44426e+07
Q5HZY0	0	0	0	0	0	0	4.17148e+07	3.24145e+08	1.04448e+08	0	0	0
Q5I0D1	3.4346e+07	5.67001e+08	9.37545e+06	3.73783e+07	8.1279e+07	0	0	0	0	0	0	0
Q5I0G4	5.1652e+07	4.16696e+08	0	0	2.09229e+08	1.69301e+08	3.33816e+07	3.7977e+08	266571017	3.52e+07	1.12076e+08	3.41739e+07
Q5M7T6	4.07667e+08	2.76049e+07	2.94768e+08	4.94733e+08	2.1406e+08	1.24961e+08	1.21288e+08	4.08663e+08	4.02106e+08	3.30056e+07	1.4733e+08	5.12593e+08
Q5M7U6	3.83767e+08	1.28005e+08	6.78075e+07	1.6465e+08	65662831	2.58182e+08	0	2.06346e+08	7.62674e+07	0	2.76576e+07	5.50167e+07
Q5M7U6	3.83767e+08	1.28005e+08	6.78075e+07	1.6465e+08	65662831	2.58182e+08	0	2.06346e+08	7.62674e+07	0	2.76576e+07	5.50167e+07
Q5M9G3	0	0	0	0	0	0	7.61719e+06	0	2.67847e+07	2.42729e+07	0	0
Q5PPH0	1.0721e+07	3.95378e+07	5.16063e+07	0	4.68014e+06	0	0	0	0	0	0	0
Q5PPJ6	0	0	0	0	0	0	9.17013e+07	0	360288412	4.77743e+07	6.50525e+07	2.30011e+08
Q5PQK2	0	0	2.57708e+07	1.94398e+08	1.46248e+07	2.03318e+07	3.8756e+07	0	2.02931e+08	1.84311e+07	0	0
Q5PQZ9	1.40754e+07	2.44549e+08	6152989	1.07478e+08	0	0	0	0	0	0	4.45387e+07	0
Q5QD51	0	0	0	0	0	0	9.91119e+07	2.88531e+08	0	1.39895e+08	0	0
Q5RJN0	5.23079e+09	2.14411e+10	3.22518e+07	8.31553e+07	2.69756e+07	1.87183e+09	4.38303e+09	9.39806e+07	3.58614e+08	1630916404	1.19956e+07	5.92265e+07
Q5RJQ4	4.40471e+08	2.72972e+08	1.303e+08	4.75744e+08	1.16555e+08	8.86596e+07	1.00527e+08	0	2.80939e+08	2.94283e+08	7.18179e+07	1.8853e+08
Q5RK08	0	0	2.37026e+07	3.38298e+07	1.77717e+07	0	0	0	0	0	0	0
Q5RK27	1.22342e+10	8.05633e+08	2.96203e+07	24844503975	1.16126e+10	1.9122e+10	0	1.02814e+08	1.65705e+10	2.19355e+10	11103910053	2.02577e+10
Q5RKG9	0	0	0	0	0	0	1.81223e+07	1.02227e+08	9.78993e+07	0	0	0
Q5RKI0	2.9253e+08	6.20493e+06	1.64426e+08	1.80288e+08	1.52925e+08	1.5845e+08	2.10765e+08	3.18661e+08	1.66611e+08	0	9.33147e+07	2.13386e+08
Q5RKI1	126486898	1.37909e+08	0	5.2873e+08	8.55434e+07	6.42841e+07	6.58717e+07	0	2.00508e+08	0	0	0
Q5RKJ9	0	0	3.94217e+08	1.93037e+09	2.38952e+08	9.93616e+07	1.90878e+08	7.38036e+08	3.80821e+08	0	0	0
Q5RKJ9	0	0	3.94217e+08	1.93037e+09	2.38952e+08	9.93616e+07	1.90878e+08	7.38036e+08	3.80821e+08	0	0	0
Q5SGE0	2.54902e+08	6.30346e+06	0	4.01903e+08	6.38025e+07	2.5679e+08	0	1.11206e+08	1.32231e+08	3.59208e+08	0	0
Q5U2N3	1.00902e+08	2.04069e+07	7.04605e+07	7.51866e+07	7.51905e+07	4.44591e+08	1.37576e+08	1.25755e+09	4.14931e+08	2.20712e+09	1.70288e+08	3.09265e+08
Q5U2P5	1.13933e+08	6.39207e+07	6.29137e+07	1.94626e+08	5.74734e+07	5.86541e+07	0	1.09791e+08	1.28542e+08	1.14697e+08	2.41463e+07	2.15632e+08
Q5U2S7	5.5879e+07	1.37975e+07	9.59288e+07	0	1.22688e+07	2.34148e+07	3.06123e+07	6.11934e+07	1.08907e+07	0	0	0
Q5U2X8	5.97981e+07	2.17728e+08	3.83565e+07	4.8597e+08	2.26912e+07	0	0	0	0	0	0	0
Q5U2Z3	5.79602e+07	1.2179e+07	0	7.47952e+07	3.615e+07	0	0	0	0	0	0	0
Q5U300	3.41878e+08	3.21253e+08	1.78184e+08	4.64481e+08	1.63925e+08	2.36218e+08	1.63936e+08	7.45356e+08	4.8499e+08	3.49848e+08	1.69587e+08	3.09608e+08
Q5U300	3.41878e+08	3.21253e+08	1.78184e+08	4.64481e+08	1.63925e+08	2.36218e+08	1.63936e+08	7.45356e+08	4.8499e+08	3.49848e+08	1.69587e+08	3.09608e+08
Q5XHZ0	1.7033e+07	6.94504e+08	3.8187e+08	0	3.98705e+08	2.73761e+08	0	2.08373e+09	8.89979e+08	0	4.74079e+08	1.16171e+09
Q5XI32	0	0	4.84298e+07	545196713	7.32565e+07	0	2.77237e+08	2.11263e+08	1.25891e+08	0	4.95767e+07	1.1006e+08
Q5XI34	3.25331e+08	4.50627e+08	3.53874e+08	1.9294e+08	1.33137e+08	1.23046e+08	1.3176e+08	3.42374e+08	2.44529e+08	1.48568e+08	6.90765e+07	1.67744e+08
Q5XI58	8.08127e+08	1.1309e+08	1.52201e+09	6.0594e+07	1.80211e+08	0	0	0	0	0	5.32125e+07	4.90144e+07
Q5XI73	5.27995e+08	1.88253e+09	2.57402e+08	3.9282e+08	2.36345e+08	1.36084e+08	1.39824e+08	2.16709e+08	2.2256e+08	0	6.03452e+07	2.21306e+08
Q5XI77	7.14683e+07	7.00964e+07	2.00759e+07	2.28091e+07	4.39118e+07	2.04878e+07	8.15069e+06	7.17412e+07	8.5827e+07	0	2.37569e+07	61635767
Q5XI78	2.3849e+08	3.36253e+07	1.78609e+08	286179654	1.81562e+08	1.2344e+08	1.81135e+08	5.91404e+08	3.68375e+08	1.76512e+08	1.99927e+08	3.04687e+08
Q5XIF3	3.46921e+07	7.92848e+07	5.08191e+07	0	9.15833e+07	0	0	0	0	0	0	0
Q5XIF6	1.38896e+10	2.07281e+07	1.00254e+10	1.35131e+10	7.49517e+09	8.30439e+09	4.65642e+09	2.86495e+10	1.74302e+10	1.73137e+09	5.43741e+09	1.34001e+10
Q5XIF6	1.38896e+10	2.07281e+07	1.00254e+10	1.35131e+10	7.49517e+09	8.30439e+09	4.65642e+09	2.86495e+10	1.74302e+10	1.73137e+09	5.43741e+09	1.34001e+10
Q5XIG8	1.70792e+07	7.03655e+07	1.74784e+07	0	2.10195e+07	0	0	0	0	0	0	0
Q5XIH3	1.29117e+08	2.54549e+07	9.07949e+07	7.76549e+07	1.00043e+08	9.78466e+07	2.6933e+07	3.08191e+08	1.28544e+08	5.11409e+07	3.87397e+07	1.16303e+08
Q5XIH7	1.14255e+08	4.97965e+08	9.49818e+07	8.62711e+07	7.01919e+07	2.4585e+08	4.85829e+07	4.99156e+07	6.89082e+07	1.55521e+07	1.42742e+08	5.64532e+07
Q5XIM9	2.5166e+08	57449752	3.14172e+08	3.34931e+08	2.30075e+08	7.2266e+07	5.36619e+07	1.36123e+08	6.25055e+08	0	1.32104e+08	1.10439e+08
Q5XIN6	4.25411e+09	211570799	1.2223e+08	5.47278e+08	1.13124e+08	4.12386e+08	1.01174e+08	390396488	2.41465e+08	1.19785e+09	4.12294e+08	1.29437e+09
Q5XIT1	1.95821e+08	2.87174e+08	2.95214e+07	7.11534e+07	8.3199e+07	1.90398e+07	5.63958e+06	4.70079e+07	8.44439e+07	0	1.17071e+07	5.50728e+07
Q62609	0	0	0	0	0	5.32929e+07	0	1.83666e+08	4.06936e+07	1.33173e+07	0	0
Q62634	2.60319e+08	9.16875e+08	9.50026e+07	2.81785e+08	1.14019e+08	1.83032e+08	8.17862e+07	5.45101e+08	3.66433e+08	5.14362e+07	2.53339e+08	3.12925e+08
Q62636	5.19674e+07	4.00528e+10	3.1288e+07	6.81114e+07	3.04765e+07	3.85752e+07	0	5.52219e+07	9.33506e+07	9.10086e+06	2.35371e+07	5.33337e+07
Q62656	6.84012e+09	8.93749e+07	1.19843e+10	11524925388	1.34757e+10	2.03568e+08	3.64554e+08	1.57701e+09	1.1144e+09	5.88399e+09	1.16778e+08	5.32564e+08
Q62658	1.01532e+10	1.53281e+07	3.98241e+07	1.30002e+11	3.05435e+07	0	8.08974e+06	7.08536e+10	3.41686e+10	0	0	0
Q62688	2.42337e+07	5.75568e+06	79776373	4.15447e+08	6.17882e+07	1.08576e+07	2.94633e+07	5.01677e+07	3.70414e+08	4.79557e+07	1.05572e+07	5.19616e+08
Q62698	0	0	0	0	0	4.14016e+07	0	4.17305e+08	1.12282e+08	0	0	0
Q62718	1.53939e+08	1.14657e+07	1.04539e+08	1.5026e+08	1.06787e+08	5.03476e+07	7.0056e+07	396643557	1.61822e+08	2.37713e+07	7.17841e+07	1.1972e+08
Q62812	2.12322e+09	9.81286e+07	8.00511e+09	44311965318	1.49198e+08	1.13976e+08	8.92098e+07	43423051664	4.71279e+08	1.61753e+10	5.50418e+08	1.2942e+08
Q62813	2.1557e+08	1.85753e+07	1.07195e+08	1.10821e+08	1.05794e+08	1.18687e+08	6.90974e+07	4.61881e+08	2.39396e+08	0	8.05633e+08	1.5442e+08
Q62829	0	0	0	0	0	1.48116e+07	0	1.16714e+08	3.65475e+07	0	0	0
Q62847	1.59517e+08	2.34295e+08	2.09911e+08	1.51014e+08	0	0	0	0	0	0	1.5682e+08	8.51647e+07
Q62861	0	0	0	0	0	0	0	0	0	0	3.58829e+06	4021096
Q62936	0	0	0	0	0	0	0	0	0	0	1.31224e+08	1.14063e+08
Q62952	1.29831e+09	3.25346e+08	1.13305e+09	1.66449e+09	7.67299e+08	4.70776e+08	3.7841e+08	3.03513e+09	1605657830	0	3.53615e+08	1.10647e+09
Q63002	0	0	0	0	0	0	4.42809e+08	4.20353e+10	6.65835e+08	0	0	0
Q63011	0	0	0	0	0	8.52958e+07	5.97805e+07	0	2.56327e+08	2.51021e+07	1.92142e+08	4.98135e+08
Q63016	0	0	3.68379e+07	9.88048e+07	7.1019e+07	1.22167e+07	0	1.34778e+08	0	1.36368e+07	0	0
Q63028	2.27814e+08	4.13382e+08	1.65615e+08	3.25702e+08	1.23976e+08	0	0	0	0	0	0	0
Q63081	2.86519e+07	1.87825e+08	1.79355e+08	0	2.37397e+07	1.22174e+07	1.02969e+07	0	5.23709e+07	0	2.82506e+07	6.48822e+07
Q63092	2.8297e+08	1.37337e+07	1.63891e+08	3.89785e+08	1.51394e+08	1.96723e+08	1.26e+08	8.1654e+08	4.51989e+08	2.73393e+08	1.69015e+08	3.17585e+08
Q63100	0	0	0	0	0	0	3.17055e+07	3.46247e+08	0	5.92985e+07	0	0
Q63151	0	0	1.27211e+08	7.48612e+06	2.69855e+07	0	0	0	0	0	0	0
Q63198	1.208e+09	9.70341e+07	1.11306e+09	1.70819e+09	9.71303e+08	2.73434e+08	6.65921e+08	1.58626e+09	9.00777e+08	5.7258e+08	2.38423e+08	9.2356e+08
Q63270	0	0	8.33082e+06	2.55456e+08	7.43014e+06	0	0	2.25449e+08	7.91412e+07	3.61994e+07	0	0
Q63345	7.67268e+08	33188248	4.93798e+08	1996609673	2.53729e+08	1.12697e+09	9.82372e+08	4.55573e+09	1.45779e+09	1.19444e+08	5.87273e+08	4.93937e+08
Q63347	4.46203e+07	1.45589e+07	1.35073e+07	2.63723e+07	9.96964e+06	0	0	0	0	0	2.17014e+08	1.2954e+07
Q63357	0	0	0	0	0	1.74531e+08	0	4.37314e+08	2.4402e+08	2.25635e+08	0	0
Q63372	0	0	2.2897e+07	4.51206e+07	4.94915e+07	5.80648e+07	0	4.10531e+08	9.10975e+07	0	0	0
Q63377	6.75824e+07	5.48426e+07	5.65286e+07	2.55235e+07	2.21883e+07	1.32923e+07	0	3.29209e+08	3.50732e+08	0	0	0
Q63416	0	0	0	0	0	1.58578e+07	2.86669e+07	1.32995e+08	0	0	0	0
Q63460	5.41354e+08	3.60748e+08	1.62059e+09	4.58714e+08	2.41096e+08	0	0	0	0	0	0	0
Q63525	1.80853e+07	2.99874e+08	3.3903e+07	0	1.4161e+07	0	0	0	0	0	0	0
Q63537	1.27632e+09	5.78398e+08	1.15433e+09	1.70374e+09	1.01408e+09	703566218	4.58269e+08	3.18758e+09	1.72405e+09	0	7.95788e+08	1.22653e+09
Q63555	2.51443e+08	1.98466e+07	3.24957e+08	8.9694e+08	1.35242e+08	1.09107e+08	4.52167e+08	1.63951e+09	2.25747e+08	1.22331e+08	1.31481e+08	1.54012e+08
Q63560	7.30763e+08	23935590	5.85161e+08	1.18209e+09	4.91202e+08	4.56604e+08	2.76094e+08	2.14558e+09	1.28664e+09	7.5164e+08	3.60748e+08	1.0102e+09
Q63560	7.30763e+08	23935590	5.85161e+08	1.18209e+09	4.91202e+08	4.56604e+08	2.76094e+08	2.14558e+09	1.28664e+09	7.5164e+08	3.60748e+08	1.0102e+09
Q63564	1.37905e+08	8.51766e+07	3.22767e+08	2.50996e+08	1.41726e+08	8.27793e+07	1.36525e+08	3.51047e+08	2.4219e+08	1.05538e+08	8.54399e+07	2.01426e+08
Q63610	5.28632e+07	1.10223e+08	1.37303e+08	7.9166e+08	0	0	0	0	0	0	0	0
Q63716	1.50831e+08	1.72617e+08	1.07517e+08	1.76433e+08	6.42048e+07	6.07174e+07	36958652	2.62928e+08	2.24302e+08	0	2.39152e+07	1.32383e+08
Q63754	0	0	0	0	0	5.54245e+07	9.15778e+06	1.16385e+08	1.09125e+07	1.89454e+07	0	0
Q63803	2.68223e+08	4.23086e+06	3.00758e+08	503278154	1.85714e+08	0	0	0	0	0	1.1309e+08	3.51489e+08
Q63881	0	0	0	0	0	0	3.32363e+08	4.47019e+09	2.11531e+09	0	0	0
Q63941	6.91098e+08	1.75115e+07	5.64772e+08	7.24125e+08	0	0	0	0	0	0	0	0
Q63965	0	0	0	0	0	3.28895e+07	5.68821e+07	9.01507e+07	0	0	0	0
Q64057	4.24488e+07	65625.1	1.16251e+08	0	4.08776e+07	2.76939e+07	2.1367e+08	1.26139e+09	2.78769e+08	0	0	0
Q641Y2	6.88404e+07	8.49437e+06	1.26923e+08	6.99858e+07	1.49395e+09	1.22141e+07	6.3152e+07	2.60461e+08	5.26056e+07	0	1.85187e+07	3.50891e+07
Q641Y8	1.1645e+08	1.85962e+08	4.26846e+07	2.33994e+07	3.50266e+07	0	1.38343e+08	9.94739e+07	7.94261e+07	3.47217e+07	0	0
Q64361	3.56722e+07	16007492	2.239e+07	0	1.27137e+07	0	0	0	0	0	0	0
Q64428	1.69471e+08	7.76352e+07	6.73032e+07	1.61683e+08	6.06691e+07	3.46928e+07	2.93757e+08	3.88096e+08	2.50128e+08	17918754	4.65208e+07	1.44478e+08
Q64548	3.10256e+09	1.12031e+07	2.32112e+08	3.75764e+08	1.48648e+08	1.40805e+08	1.76424e+08	6.93825e+08	4.27586e+08	4.44923e+08	1.56721e+08	1.77533e+08
Q64560	0	0	0	0	0	1.04318e+09	2.28204e+07	0	0	8.23186e+07	5.00506e+07	1.23339e+08
Q64568	6.74271e+08	1.04123e+08	3.579e+08	9.06957e+08	0	0	0	0	0	0	2.36774e+08	7.60514e+08
Q64605	2.93936e+08	3.84555e+09	6.38458e+07	8.17398e+08	3.04372e+08	0	0	0	0	0	0	0
Q64640	4.23249e+07	3.85572e+07	5.67441e+07	0	5.39071e+07	0	0	0	0	0	0	0
Q66H61	0	0	5.10686e+07	2.53797e+08	5.77424e+07	1.86603e+07	0	9.34392e+08	5.8316e+07	2.10386e+10	0	0
Q66HA6	0	0	0	0	0	0	9.16718e+06	5.81937e+07	1.41689e+07	0	0	0
Q66HA8	1.70356e+08	4.15842e+08	1.17156e+08	1.7316e+08	8.01357e+07	1.21944e+08	9.10989e+07	3.94276e+08	2.31701e+08	2.08841e+08	7.78462e+07	1.37619e+08
Q66HD0	7.39576e+08	2.35526e+08	6.05118e+08	6.14115e+08	2.51016e+08	3.89977e+08	6.14522e+08	2.39807e+09	2.15577e+09	5.08372e+08	1.88253e+09	3.58367e+08
Q66HD0	7.39576e+08	2.35526e+08	6.05118e+08	6.14115e+08	2.51016e+08	3.89977e+08	6.14522e+08	2.39807e+09	2.15577e+09	5.08372e+08	1.88253e+09	3.58367e+08
Q66HF1	2.96122e+08	2.29285e+07	2.10377e+08	3.53844e+08	1.61298e+08	1.87559e+08	2.23191e+08	6.71394e+08	5.7705e+08	2.0943e+08	1.53125e+08	3.51704e+08
Q66HR2	1.73439e+07	5.30579e+07	1.34388e+07	4.37393e+06	4.93429e+06	0	0	0	0	0	0	0
Q66X93	0	0	0	0	0	1.3347e+09	0	0	2.46647e+08	2.47546e+07	4.53931e+07	1.33928e+08
Q68FP1	1.1448e+08	1.51529e+07	7.83957e+07	4.34438e+08	1.3605e+08	7.40792e+07	7.24262e+07	2.67467e+08	3.74194e+08	5.83467e+07	9.16055e+07	2.27931e+08
Q68FQ0	1.23974e+08	1.21554e+08	4.51049e+07	1.8043e+07	4.14036e+07	9.10875e+07	1.4094e+07	5.81795e+08	5.50441e+07	0	2.29285e+07	5.64805e+07
Q68FQ9	3.27949e+07	6.79113e+07	4.00703e+07	2.09559e+09	2.56455e+07	1.70169e+07	5.88431e+07	0	1.6258e+08	0	1.74668e+08	4.87567e+07
Q68FR6	1.04737e+08	7.19389e+07	5.88056e+07	5.99268e+08	6.32784e+07	2.29191e+07	2.56717e+07	1.07593e+09	2.50077e+08	2.85139e+07	2.66453e+07	2.00077e+08
Q68FS4	6.05608e+07	9.51225e+06	118534368	9.94873e+07	3.03545e+07	2.30141e+07	2.10746e+07	8.2077e+07	9.27862e+07	0	0	0
Q68FU3	6.5251e+08	2.07126e+07	2.15889e+07	0	1.42213e+08	0	0	0	0	0	0	0
Q68FW9	4.87234e+06	4.5189e+07	3.89619e+06	7.71325e+07	0	0	0	0	0	0	0	0
Q68FX0	2.58748e+08	1.05082e+09	1.81322e+08	4.48803e+08	1.32659e+08	1.26334e+08	1.69514e+08	5.55842e+08	4.25643e+08	0	1.00165e+08	1.68329e+08
Q68FY0	2.86123e+08	2.19179e+07	2.57665e+08	3.17377e+08	2.61164e+08	1.32017e+08	1.60774e+08	4.47619e+08	3.74251e+08	0	1.43075e+08	2.15785e+08
Q6AXS4	0	0	0	0	0	0	0	0	0	0	7.80823e+06	1.43613e+07
Q6AXT5	3.2419e+08	1.21022e+08	1.31686e+07	0	3.36372e+07	0	3.31431e+08	1.70293e+07	17354132	0	0	0
Q6AXU4	0	0	0	0	0	6.88366e+07	0	6.59338e+07	0	2.80893e+08	0	0
Q6AXV4	2.7783e+07	2.78096e+07	7.40918e+07	2.69663e+07	3.12469e+07	0	1.59188e+08	3.88272e+08	1.69683e+08	0	0	0
Q6AXX6	60182040	4.95767e+07	2.34523e+07	3.29128e+07	5.81522e+06	454365274	0	15321633	3.3382e+07	0	4.2051e+07	5.07505e+08
Q6AY09	2.0799e+08	2.84174e+07	1.24184e+08	4.93662e+08	8.52706e+07	8.15435e+07	7.55995e+07	3.96121e+08	1.41894e+08	0	3.26638e+07	2.7343e+08
Q6AY84	9.48436e+08	7.00592e+06	1.34366e+09	1.88773e+08	7.02293e+08	1.14939e+09	7.7802e+08	1.65441e+08	9.71806e+08	0	4.36745e+07	1.62401e+08
Q6AYD2	0	0	0	0	0	7.81046e+07	6.79975e+07	0	0	2.26835e+10	1.45034e+10	1.53488e+08
Q6AYH5	1.88533e+07	7.66581e+07	0	1.97676e+08	2.3592e+07	1.33477e+07	8.19408e+06	1.17148e+08	2.72418e+07	0	0	0
Q6AYN4	1886158585	1.19956e+07	2.9543e+07	0	2.98927e+07	0	0	0	0	0	0	0
Q6AYS7	11913791	7.71159e+07	5.29715e+07	0	1.64226e+07	0	0	0	0	0	0	0
Q6DGF2	1.20417e+07	1.51091e+08	0	1.73751e+09	1.17891e+09	5.19949e+07	0	2.93852e+09	1.60855e+09	4.5161e+08	2.86813e+08	2.00619e+09
Q6DUV1	0	0	0	0	0	3.23895e+08	1.73985e+07	6.34709e+08	1.12755e+08	0	0	0
Q6GMN2	1.15183e+08	3.87869e+07	1.29774e+08	0	33383324	0	0	0	0	0	2.82792e+07	1.13787e+08
Q6GMN8	0	0	0	0	0	1.9823e+08	3.60659e+08	0	3.49869e+08	0	0	0
Q6GT74	0	0	0	0	0	0	0	0	0	0	1.45589e+07	3.84213e+07
Q6IFV3	0	0	0	0	0	0	1.48489e+08	5.87162e+08	0	1.539e+08	0	0
Q6IG02	2.15865e+08	0	2.5378e+08	2.58188e+08	1.87798e+08	686947140	8.45525e+07	1.30648e+08	1.67248e+09	1.50906e+08	77276287	3.12724e+08
Q6IG02	2.15865e+08	0	2.5378e+08	2.58188e+08	1.87798e+08	686947140	8.45525e+07	1.30648e+08	1.67248e+09	1.50906e+08	77276287	3.12724e+08
Q6IMF3	7.42359e+08	3.64588e+10	0	8.62526e+08	5.58325e+08	3.03362e+08	2.3546e+08	0	0	3.83891e+08	3.55904e+08	1.10575e+09
Q6IRG7	7.78353e+08	3.3579e+07	2.56609e+08	5.07985e+08	1.80154e+08	1.46942e+08	2.3876e+08	0	536710469	2.71021e+08	1.22429e+08	4.1408e+08
Q6IRH6	5146918472	1.30579e+08	6.2694e+08	9.09583e+08	2.50562e+09	2.55112e+08	1.73808e+08	9.93737e+08	2.34313e+09	0	2.80779e+08	5.85982e+08
Q6IRJ7	0	0	2.02227e+07	2.45605e+07	1.44831e+07	0	0	0	0	0	0	0
Q6JAM9	4.33178e+07	1.17326e+08	9.59666e+07	0	3.83835e+07	0	0	0	0	0	0	0
Q6JE36	1.49505e+07	1.34299e+08	19142055	1.4476e+07	3.96821e+06	1.00856e+07	5.7128e+06	4.34624e+07	0	0	1.27501e+07	24892373
Q6KC51	1.29761e+08	9.05429e+07	1.13322e+07	1.31216e+08	0	0	0	0	0	0	1.21403e+08	3.85822e+07
Q6LDS4	1.54987e+08	2.52182e+06	5.58942e+07	1.21829e+08	5.91731e+07	2.21966e+07	1.32861e+07	1.0539e+08	9.70585e+07	8.32437e+06	0	0
Q6MFX8	0	0	0	0	0	1.29454e+07	0	6.7539e+08	3.59099e+07	0	0	0
Q6MG06	5.82597e+07	8.36684e+06	4.35257e+07	3.20882e+08	4.29345e+06	0	0	140115394	2.28601e+07	2.13199e+07	0	0
Q6MG49	0	0	0	0	0	4.01925e+07	1.23156e+07	4.74083e+08	0	0	5.98334e+07	8.81442e+07
Q6P136	0	0	8.45239e+07	8.06491e+08	3.17076e+07	2.91462e+08	1.09287e+08	2.10613e+08	1.14341e+08	2.99019e+07	0	0
Q6P2A7	2.27206e+07	1.14168e+08	0	1.15259e+08	1.74414e+08	0	2.81095e+06	9.6785e+08	2.61263e+07	0	6.76583e+07	3.26469e+07
Q6P502	1.39285e+08	1.34859e+08	8.06761e+07	2.45648e+08	3.55159e+09	2.14578e+08	5.48829e+07	1.78322e+08	6.51108e+07	0	7.96426e+07	7.4134e+07
Q6P503	0	0	0	0	0	3.21435e+07	0	1.82232e+08	1.46995e+08	0	0	0
Q6P6R2	2.19184e+08	2.32509e+08	2.46686e+08	1.652e+08	2.01595e+08	8.26847e+07	8.42324e+07	6.1578e+08	2.33839e+08	0	1.34859e+08	2.15187e+08
Q6P6T0	0	0	0	0	0	0	3.39203e+07	0	6.55073e+08	3.79897e+07	0	0
Q6P6V0	7.43566e+08	1.07484e+07	4.21091e+08	7.28719e+08	6.15924e+08	3.50705e+08	1.9795e+08	1.1068e+09	734496763	2.80814e+08	2.77635e+08	5.99326e+08
Q6P7Q4	5.83503e+07	6.42257e+08	4.1526e+07	2.88748e+07	1.88675e+07	15496595	2.28823e+07	7.34827e+07	5.74204e+07	0	1.78731e+07	8.0262e+06
Q6P7S0	2.25599e+09	4.77697e+07	2.1113e+09	2.33278e+09	1.07612e+09	0	1.16075e+09	4.68439e+09	2.35146e+09	0	3.99588e+08	1.55129e+09
Q6P9T8	9.35921e+09	7.90561e+07	7.95806e+09	8.69541e+09	5.06363e+09	4.15355e+09	4.11642e+09	1.76806e+10	7.82898e+09	2.09778e+09	3.94377e+09	5.84636e+09
Q6P9V1	5.05882e+07	7.26533e+07	1.35987e+07	4.91038e+07	2.02535e+07	4.92625e+07	3.24057e+07	2.54757e+08	1.51902e+08	0	0	0
Q6PCU0	0	0	0	0	0	1.38342e+08	8.99159e+07	3.20859e+08	0	0	0	0
Q6PCU2	2.09009e+08	5.29448e+07	1.37181e+08	1.71937e+08	1.28302e+08	3.74608e+07	5.76677e+07	2.01844e+08	1.94161e+08	0	1.08403e+08	8.33875e+07
Q6PDU7	1.56007e+08	4.86273e+07	6.42127e+07	37104857	5.42087e+07	5.75811e+06	3.39565e+07	1.25343e+09	0	0	7.35949e+06	7.83017e+06
Q6PST4	2.47778e+08	1.08186e+08	4.47259e+07	3.6893e+07	6.93015e+07	0	0	2.30309e+08	4.12493e+07	1.98536e+07	1.05475e+08	3.54765e+08
Q6PW34	0	0	0	0	0	0	0	0	0	0	3.03792e+07	1.66512e+08
Q6Q0N1	4.57783e+07	7.53011e+08	1.66203e+07	0	1.38087e+07	0	0	0	0	0	0	0
Q6QIX3	8.06426e+07	2.33369e+08	0	2.91614e+07	3.17119e+07	1.65567e+08	9.07759e+07	6.99264e+07	1.0462e+07	0	0	0
Q6QLM7	0	0	0	0	0	0	0	7.54087e+08	93763029	1.63765e+08	0	0
Q6QLM7	0	0	0	0	0	0	0	7.54087e+08	93763029	1.63765e+08	0	0
Q6RJR6	2.19764e+08	1.30632e+09	2.88403e+08	0	1.67953e+08	1.5145e+08	1.11469e+08	3.6198e+08	1.7061e+08	1.06687e+08	5.93016e+07	1.27631e+08
Q6RUV5	1.9052e+08	1.4532e+08	9.05348e+07	1.01304e+08	3.91741e+07	0	0	0	0	0	6.47275e+07	1.35997e+08
Q6TUE6	0	0	0	0	0	0	0	0	0	0	1.41432e+09	7.36763e+07
Q6TXE9	0	0	0	0	0	0	0	0	0	0	1.60476e+08	2.76037e+07
Q6XD99	6.03363e+08	8.26525e+08	2.23079e+09	1.35105e+09	2.76482e+08	6.5352e+08	1.33538e+09	6.72643e+09	1.27265e+09	2.66192e+09	1.26792e+09	1.172e+09
Q6XVN8	7.46154e+07	9092221	7.28598e+07	0	2.20256e+07	0	0	0	0	0	4.65712e+07	3.92817e+07
Q75N36	0	0	0	0	0	0	0	0	0	0	4.50627e+08	2.85567e+07
Q75Q39	1.00188e+08	2.17902e+08	8.94362e+07	1.93011e+08	1.37331e+08	1.74826e+08	7.91053e+07	4.06833e+08	2.24137e+08	7.72966e+07	3.3864e+07	3.42178e+07
Q75Q41	0	2.46188e+07	1.01958e+07	1.22686e+07	0	0	0	0	0	0	0	0
Q76GL9	2.41934e+07	11143264	4.17783e+07	0	1.66902e+08	0	0	0	0	0	1.46574e+08	2.10186e+07
Q78P75	5.85538e+07	2.73608e+08	5.92679e+07	1.02816e+08	4.8946e+07	0	2.37957e+06	2.14138e+08	3.79385e+07	0	0	0
Q792I0	3.01631e+07	5.70448e+08	5.98817e+07	1.82898e+07	0	0	0	0	0	0	0	0
Q794F9	1.23796e+08	2.47735e+07	122715822	3.33678e+08	8.63388e+07	1.21469e+08	7.01413e+07	8.10809e+08	2.03577e+08	3.47773e+08	3.95378e+07	1.0992e+08
Q7M0E3	4.79163e+07	2.44205e+08	6.95906e+07	5.72054e+07	4.26255e+07	2.43761e+07	8.65476e+06	7.00535e+08	2.04853e+07	0	0	0
Q7TMA5	1.81231e+09	2.61721e+08	1.39632e+08	1.28808e+09	0	2.61451e+08	1.08109e+08	0	5.31702e+08	0	0	0
Q7TMB7	0	0	0	0	0	1.62387e+08	2.24309e+08	3.79975e+08	1.88269e+08	2.34694e+08	3.20964e+07	1.21585e+07
Q7TNM3	1.25498e+08	1.49027e+08	7.166e+07	3.23783e+08	7.0822e+07	6.29502e+07	1.10938e+08	3.35469e+08	3.46388e+08	1.53886e+08	7.19389e+07	2.95043e+08
Q7TP27	0	0	0	0	0	0	0	0	0	0	1.37337e+07	2.39483e+07
Q7TP54	0	0	0	0	0	0	6.56754e+07	974226397	4.47515e+08	2.693e+08	0	0
Q7TP98	0	0	1.80924e+07	2.2179e+10	32673126	0	0	0	0	0	0	0
Q7TPB1	8.9001e+07	1.46969e+08	2.76381e+08	7.99846e+07	4.96363e+07	5.67241e+07	6.65203e+07	5.3527e+08	1.17293e+08	0	7.8414e+07	4.55098e+07
Q7TPB7	1.03321e+08	1.28001e+08	3.04378e+06	28293957	63029908	4.9774e+07	3.27053e+07	139940194	142447016	1.53555e+07	7.17497e+07	28693237
Q7TQ85	0	0	0	0	0	0	0	0	0	0	5.44135e+07	3.57321e+07
Q7TQ90	8.35245e+07	2.12339e+08	2.14572e+07	28634137	2.03438e+07	115315242	0	3.19777e+07	3.43895e+07	0	0	0
Q7TSP2	0	0	0	0	0	1.69734e+08	8.32379e+07	0	0	4.40973e+08	0	0
Q7TT49	6.60021e+08	2.40939e+08	6.07714e+07	0	6.88852e+08	4.74745e+08	2.79233e+08	1.1751e+09	3.98556e+08	4.31414e+08	1.35822e+08	6.88478e+08
Q80U96	0	0	0	0	0	0	0	0	0	0	2.8014e+07	1.36611e+07
Q80W89	5.21779e+07	5.82754e+08	1.58536e+07	36970623	0	2.04338e+07	1.26031e+07	1.32916e+08	0	0	1.83541e+07	6.35818e+07
Q80WF4	0	0	0	0	0	1.5474e+07	0	9.70922e+07	0	1.09892e+06	1.40099e+08	60443978
Q80Z30	5.10682e+08	5.6643e+07	8.42219e+07	3.05521e+08	1.6259e+08	3.48218e+07	4.29022e+07	4.26628e+08	3.15051e+08	7.88572e+07	1.60794e+08	1.9897e+08
Q80Z30	5.10682e+08	5.6643e+07	8.42219e+07	3.05521e+08	1.6259e+08	3.48218e+07	4.29022e+07	4.26628e+08	3.15051e+08	7.88572e+07	1.60794e+08	1.9897e+08
Q80ZE8	0	0	0	0	0	0	1.21732e+08	9.14546e+08	3.48976e+08	0	0	0
Q812E9	5.10422e+08	8.99164e+06	3.46568e+08	4.83465e+08	3.79123e+08	2.08712e+08	1.03288e+08	8.88492e+08	6.17201e+08	6.00336e+07	2.33585e+08	4.03149e+08
Q8CF97	0	0	10271147572	9.45095e+09	8.00516e+07	2.56005e+10	0	1.87586e+10	5.09713e+08	5.10945e+10	1.02536e+08	3.52813e+10
Q8CFG7	0	0	0	0	0	1.32188e+08	3.53503e+07	9.8851e+08	0	8.37513e+07	0	0
Q8CFN2	5.38475e+07	6.62075e+07	5.34353e+07	1.81939e+07	3.06892e+07	0	0	0	0	0	0	0
Q8K4K5	0	0	0	0	0	0	6.91424e+06	1.94203e+08	3.49537e+08	0	0	0
Q8K4M9	0	0	0	0	0	0	2.33842e+08	2.0791e+09	1.54347e+08	0	0	0
Q8K4V4	1.91946e+08	2.69608e+07	3.89952e+07	0	3.08011e+07	0	0	0	0	0	0	0
Q8K4Y5	8.13423e+07	3.98194e+07	5.346e+07	7.82079e+07	4.23008e+07	3.40517e+07	1.09147e+08	1.59065e+08	3.47883e+08	0	1.99752e+07	8.44453e+07
Q8R2H0	0	0	1.01052e+08	9.59833e+07	6.08381e+07	2.10269e+07	1.36882e+06	1.24717e+08	1.33704e+08	1.01544e+08	5.35314e+07	4.62974e+07
Q8R491	8.07571e+07	3.30991e+07	1.01387e+08	5.54401e+08	2.24945e+07	0	0	0	0	0	0	0
Q8SEZ5	2.66937e+08	4.771e+07	2.96036e+08	3.05738e+08	2.01494e+08	8.09605e+07	1.17589e+08	5.1694e+08	2.94427e+08	3.20208e+07	0	0
Q8VBU2	1.54627e+08	9.87201e+07	8.71488e+07	3.37839e+07	1.0351e+08	1.1506e+07	6.74374e+07	1.0937e+08	6.13887e+07	1.90493e+08	4.41672e+07	1.59952e+08
Q8VHF5	4.75791e+08	8.42202e+07	2.37785e+08	5.10299e+08	2.25774e+08	8.36525e+07	2.88687e+08	6.28562e+08	3.38003e+08	5.55163e+07	1.97676e+08	3.36986e+08
Q8VI04	69054635	4.81886e+07	8.35718e+07	211149437	4.90669e+07	6.38403e+07	7.75907e+07	8.66731e+07	7.20329e+07	0	2.34308e+07	1.7718e+08
Q8VIJ5	3.74845e+08	1.78731e+07	3.30459e+08	1.23425e+08	4.07072e+08	0	0	4.67171e+08	4.13432e+08	2.51342e+09	0	0
Q91XV6	0	0	0	3.94171e+07	2.28764e+08	4.75088e+07	2.89011e+06	0	4.91553e+07	0	1.14168e+08	339727130
Q91Y81	1.58652e+08	3.75759e+07	4.43164e+07	1.76641e+07	3.47917e+07	44748709	1.29249e+07	1.47207e+08	2.67707e+07	0	1.53025e+07	7.69025e+07
Q91ZN1	9.6711e+07	4.15308e+07	1.72071e+08	1.40213e+08	2.66658e+08	7.08496e+07	4.13522e+07	2.03347e+08	1.69799e+08	2.04316e+07	9.01534e+07	1.38058e+08
Q920J4	1.8939e+08	2.24121e+07	1.41e+07	2.60765e+07	4.31599e+07	1.27953e+07	1.14458e+07	5.85398e+08	1.11805e+07	0	7.00592e+06	2.39141e+08
Q920L2	2.36968e+08	1.55805e+07	2.58314e+08	9.77151e+07	1.7973e+08	1.25743e+08	7.06191e+07	773675936	3.31724e+08	4.06046e+07	1.03454e+08	1.55906e+08
Q921A2	0	0	0	0	0	0	0	0	0	0	1.94161e+07	1.07302e+09
Q923S8	0	0	0	0	0	20574698	0	8.03029e+08	0	6.09695e+07	0	0
Q924N5	3.19644e+07	6.0942e+06	4.58958e+07	205044873	1.72843e+07	2.21132e+07	2.24304e+08	3.63641e+08	1.0523e+08	1.89521e+07	2.66037e+07	1.45704e+08
Q924S5	2.6028e+08	1.40943e+08	8.63103e+07	2.16628e+08	9.36314e+07	1.00885e+08	4.68858e+07	3.1735e+09	3.38419e+08	8.23208e+09	1.09399e+08	1.39783e+08
Q99ML5	3.03752e+07	6.46987e+07	2.85454e+07	1.7187e+07	32337341	1.51249e+07	0	35304932	4.27792e+07	0	2.29318e+07	1.10487e+07
Q99MZ4	7.31366e+06	2.08459e+07	2.48847e+07	4.21352e+07	295453318	2.68188e+07	7.80572e+06	1.40295e+08	3.58701e+07	7.40355e+06	0	0
Q99PD4	1.72617e+08	1.09907e+08	4.30034e+07	5.40521e+07	7.05416e+07	2.41681e+07	3.24186e+06	8.73596e+07	3.05821e+08	0	3.67407e+08	1.0536e+08
Q99PF5	8.62788e+07	7.01834e+07	5.11866e+07	2.35587e+08	6.75603e+07	1.04115e+08	3.05656e+07	8.35391e+07	5.75289e+07	7.57504e+07	0	0
Q99PW9	0	0	0	0	0	0	0	2.61308e+09	1.01636e+09	3.45166e+07	0	0
Q9EPC6	1.66188e+08	7.9033e+06	6.99393e+07	0	4.73312e+07	0	1.59241e+07	1.95227e+08	1.45441e+08	0	0	0
Q9EPH8	7.71411e+07	2.44963e+08	4.8495e+07	1.21338e+08	9.0399e+07	4.36359e+07	0	1.4777e+08	210451460	0	2.7973e+07	129885090
Q9EPR9	1.19718e+08	1.41564e+07	4.91049e+07	1.00487e+08	2.86845e+08	3.00739e+07	1.2824e+07	2.44613e+08	3.14392e+08	0	0	0
Q9EQS0	0	0	1.688e+10	2.86056e+08	125030199	3.32491e+07	0	9.82107e+07	1.91309e+08	0	0	0
Q9EQX9	9.52027e+07	2.26313e+08	1.90248e+08	4.19558e+08	8.09864e+07	1.24798e+08	3.46451e+07	1.22766e+08	7.70998e+07	0	1.44481e+07	3.80082e+08
Q9ERB4	1.38418e+08	2.41056e+06	1.06848e+08	2.12505e+08	2.97992e+07	1.19534e+08	1.02605e+08	1.32789e+09	2.55534e+08	2.18472e+08	0	0
Q9ERH3	1.65016e+09	279977353	5.41833e+07	2.60502e+09	1.48243e+08	8.46195e+07	3.22092e+07	2.79306e+08	2.07249e+08	3.04368e+08	2.10942e+08	9.29914e+07
Q9ERQ6	0	0	0	0	0	0	0	0	0	0	6.82849e+07	5.79322e+07
Q9ERS3	0	0	0	0	0	0	0	0	0	0	7.76352e+07	1.59753e+08
Q9ESW0	1.11857e+08	7.16408e+07	2.80225e+07	558352946	4.91637e+07	0	0	0	0	0	0	0
Q9JHL4	8.32429e+07	1.62812e+08	2.65206e+07	0	2.86307e+07	0	0	0	0	0	0	0
Q9JHU0	0	0	0	0	0	1.06573e+08	8.51077e+07	4.73141e+08	0	0	0	0
Q9JI12	0	0	6.14749e+07	1.04882e+08	2.1955e+07	0	0	0	0	0	0	0
Q9JI66	1.9238e+08	1.25515e+08	5.39987e+07	8.98827e+08	5.46137e+07	6.06768e+07	1.54551e+08	7.54915e+08	1.45802e+08	4.57874e+08	46894257	1.62588e+08
Q9JIR4	0	0	0	0	0	0	7.71517e+07	0	6.65525e+08	1.57544e+08	4.35456e+07	1342737377
Q9JJ54	1.06777e+08	3.918e+08	1.21505e+08	4.47798e+08	8.05557e+08	0	1.85111e+08	1.71643e+09	1.02371e+08	0	0	0
Q9JJW1	1.92526e+07	1.19906e+08	5.70648e+06	2.2385e+07	0	1.85713e+06	4.48165e+06	1.59553e+07	3.30681e+07	0	0	0
Q9JKB7	2.45909e+08	6.52845e+06	1.34519e+08	213406249	1.50579e+08	1.77459e+08	4.24894e+07	6.2284e+08	3.00627e+08	1.04926e+07	6.69244e+07	1.90023e+08
Q9JKE3	9.43134e+07	1.05572e+07	9.77228e+07	0	1.01474e+08	6.34813e+07	0	3.43672e+08	0	4.84747e+07	4.51312e+07	1.2335e+08
Q9JKS6	1.12691e+09	1.2978e+08	0	5.29193e+08	2.77673e+08	1.05754e+08	2.85275e+08	1.8993e+09	6.58956e+08	1.07957e+08	1.13403e+08	2.43096e+09
Q9JLA3	5.66379e+08	1.82008e+09	0	3.64426e+08	7.12622e+07	1.86905e+07	0	3.21513e+08	3.54853e+08	6.69209e+07	0	0
Q9JLA3	5.66379e+08	1.82008e+09	0	3.64426e+08	7.12622e+07	1.86905e+07	0	3.21513e+08	3.54853e+08	6.69209e+07	0	0
Q9JLJ3	2.29705e+08	1.5143e+08	3.81846e+07	1.05046e+07	3.66061e+07	4.50158e+07	0	2.80399e+07	2.21245e+07	0	1.16135e+08	6.4338e+07
Q9JLJ3	2.29705e+08	1.5143e+08	3.81846e+07	1.05046e+07	3.66061e+07	4.50158e+07	0	2.80399e+07	2.21245e+07	0	1.16135e+08	6.4338e+07
Q9JLT5	3.21539e+07	1.73425e+08	5.73741e+07	1.19371e+08	0	0	0	0	0	0	0	0
Q9JLZ1	1.1051e+08	7.81947e+08	6.31621e+07	1.11681e+08	5.39477e+06	0	0	0	0	0	0	0
Q9QUH6	3.9652e+08	6.79877e+08	2.8775e+08	3.97725e+08	2.6949e+08	1.66978e+08	2.62719e+08	9.08594e+08	2.91971e+08	2.23477e+09	0	0
Q9QX69	8.89358e+07	1.37482e+08	9.68904e+07	7.69203e+07	8.06273e+07	6.59428e+07	5.75781e+07	2.08218e+08	1.6287e+08	3.6352e+07	3.56086e+07	1.05876e+08
Q9QXQ0	3.3176e+08	1.67071e+08	1.43092e+08	4.3077e+08	2.01056e+08	1.5961e+08	3.02277e+08	1.05488e+09	500963429	2.37972e+08	1.00157e+08	2.80591e+08
Q9QXU8	0	0	2.95869e+07	6.4178e+06	1.91762e+07	2.93908e+07	2.54431e+07	1.3532e+08	2.06732e+08	0	0	0
Q9QYU4	1.23359e+08	17693286	1.18564e+08	1.27858e+08	1.09692e+08	3.93882e+07	2.39076e+07	1.5072e+08	1.08072e+08	0	4.30972e+07	2.77703e+07
Q9QZA2	1.89789e+08	7.67185e+07	4.62633e+09	9.07305e+07	1.68037e+07	2.26433e+08	2.19371e+07	474482598	7.74048e+08	2.97739e+08	1.12034e+08	6.54118e+07
Q9QZM5	0	0	0	0	0	0	3.66287e+06	2.74829e+07	1.20312e+08	0	0	0
Q9QZM6	0	0	0	0	0	0	0	0	0	0	0	0
Q9R063	1.50873e+08	8.67914e+06	5.98077e+07	1.7676e+08	8.38534e+07	9.15519e+07	4.89762e+07	1.10159e+08	1.18233e+08	0	4.68121e+07	7.51766e+07
Q9WU82	1.15676e+09	1.21554e+08	8.40843e+08	1.83735e+08	4.52363e+07	4.62582e+07	7.29722e+07	1.26431e+09	1.88723e+08	8.83622e+07	4.13533e+07	9.76739e+07
Q9WVR7	0	0	1.57541e+07	1.07028e+07	3.37844e+06	0	0	0	0	0	0	0
Q9Z0J8	4.20544e+07	3.87766e+08	5.79788e+07	39503870	4.58139e+07	5.89769e+07	3.53093e+07	235327669	1.16545e+08	0	6.61771e+07	2.75441e+07
Q9Z0V6	4.96234e+07	9.15784e+07	8.66172e+07	0	1.81439e+07	1.46273e+07	1.99592e+07	2.74127e+07	0	13808298	1.71163e+07	2.9208e+07
Q9Z0W5	4.53548e+08	8.8793e+06	2.99681e+08	5.69852e+08	8.43485e+08	4.01615e+08	1.38037e+08	1.03304e+09	0	8.03273e+07	0	0
Q9Z1B2	2.44787e+07	1.0384e+08	1.67214e+07	1.34891e+07	2.70046e+07	1.54592e+08	5.67327e+06	2.43096e+07	2.39847e+07	0	4.86273e+07	4.16241e+07
Q9Z1X8	2.83525e+07	1.45396e+08	49878064	0	2.98924e+07	0	0	0	0	0	1.26015e+07	2.6604e+07
Q9Z1Y3	7.83152e+07	1.74668e+08	5.0723e+07	1.82958e+08	1.26458e+07	2.61693e+07	1.69125e+07	8.83499e+07	3.10561e+07	6.96029e+07	0	0
Q9Z214	5.85712e+07	1.29291e+08	1.58031e+07	0	1.60853e+07	2.03692e+07	40343743	1.5081e+08	2.89151e+08	0	1.82659e+07	8.03596e+07
Q9Z270	6.75778e+08	3.15212e+07	3.27725e+07	0	5.30149e+07	3.67487e+07	2.4631e+08	0	9.83123e+07	0	1.12516e+07	9.08959e+07
Q9Z272	1.59914e+08	6.79908e+08	6.76648e+07	3.31889e+07	2.42604e+08	1.06875e+08	6.6286e+08	2.12886e+08	1.54684e+08	1.07527e+08	2.33417e+08	2.86537e+07
Q9Z2F5	1.09382e+08	7.65314e+06	7.51958e+07	7.59169e+07	2.9412e+07	3.60566e+07	0	9.23678e+07	8.43992e+07	0	4.79715e+07	2.45964e+08
Q9Z2L0	1.05437e+09	0	9.06272e+08	7.85093e+08	6.45652e+08	3.91929e+08	2.54819e+08	1.37149e+09	8.84682e+08	8.12464e+07	2.92209e+08	966079123
